# Supplementary material for: Genomic-Wide Identification and Characterization of the Uridine Diphosphate Glycosyltransferase Family in Eucommia ulmoides Oliver
Source: MDPI journal article supplement (doi:10.3390/plants10091934), 2021-09-17
Supplement: s1 [file s1]

## List of the amino acid sequences of *Eu*UGTs

>GWHPAAAL000151

MVPISTPIRKCHVAVPYPRGHVNPMMNICKLIASKFDPDRLVITFVVTEEWLGLIGSEIKPANVRFA  
AIPNVVPSERVRAADMVGFVTAVMTKMEQPFEEVLDRMQSPASV IADTFLRWAVEVGNRRSIPVASLWT  
MPAMVFSVFYNFELVVENGQFPIELCERGEERVDYLPGIPSIRLSDLPTI IHRDQNLRLCLTAFANVS  
RARYLLFTTCSDELPQVIAALKTQFPFPLYCLGPTIPYFNLQQPPPITPNHHDYLNKWLDSKPPNSVLVVS  
LGSFLSVSTSQMDEIEAGLGGSGVNYLWVNRGHAGGVGGGRMVVRWCDQLRVLCHPSVGGFWTHCGWNS  
TMEGIYAGKPMLTLPILMDQVPNSKCVVEDWKIGWEVKREEGNLVSREKIVEVRRFMDEGSEEREEMMR  
RAEELRRLCRTALVRGGSSHENLQAFVDGIAKF

>GWHPAAAL000153

MAERGEERVDYLPGIPSIRLADLPTI IHQSDQNLRLCLTAFANVSRAQYLLFTTCSDELPQVIATLKTQ  
FPFPLYCLGPTIPYFNLQQPQTTPNHHDYLNKWLDSKPPNSVLVYSLGSFLSVSTSQMDEIEAGLGGSSV  
NYLWVNRGDAGGVGGGGMVVRWCDQLRVLCHPSVGGFWTHCGWNSTMEGIYAGKPMLTLPVMDQVPNS  
KCVVEDWKIGWEVKREEGNLVRREKIVEVRRFMDEGSEEREELVRAEELRRLCRTALGRGGSSHENLQ  
AFVDGIAKF

>GWHPAAAL000493

MEQREYRAHVLAIPFPAPGHVNPLLQFCKRLEFKGLKATLAITKFLSKSMQSRLGSIKIDTISDGYDEIG  
RHNAESLGWISTFKEVGSKSVADLIHKFRSLGHPIDCIVYDSFLPWVLDVAKENGVAGASFMQKCAVN  
HINYHVYHKKIPYPFSSPTYSIPGLPSLDLEYMPGFMLVHPDYELVLSQFSTVDRADYVFVNTFYKLEA  
EVLDEMSKVLVPKPIGPTVPSFYLDNRVEDDKNYGLNLHQLDSSVCLNLWSSKPARSVVYVSFGSVAISS  
PAANEMEEIAWGLKNSNCSFLWVVKANEEPNLPQNFKEEMSEKGLI VAWSPQIEVLSHHSVGCFLTHCGW  
NSTIEAICLGVPMAVPKCTDQTTNSKSIQDVWVKGVKVKASEDGIARREEIERCIKVVMEGESGEELKK  
NAAKWESELAKEAVSEGGTSDENINEFVSQLTNNSSTQS

>GWHPAAAL000531

MERDLDEMGSKKPHVLVIPFPAQGHFSPALQLSKRLASKGLRVTFVTSMSSAKSSSSIRMEQIGDGYEEG  
EEPESKEAFTEHIQTVFSQSLGDIIEKQKQIGYPIKLVYDSVMPWALEIAHKLGIYGAPFFTQPCAVCA  
IYYHMQGTLEVSLEGTKVSLPSLPPLEKNDLPSFISNMF SHEFLT KTILGQFSNFHEADWILNFTFDKL  
EDEVVKWMASQWPIKTMGPTIPSLYLDKRLKEDKEYGLSLFTPNTASMRWLDTKEQGSVVYVSFGSLAI  
LDETQMEELSWGLLQTNNYFLWVVRASEESKL PNNFMAKTSEKGLVVDWCPQLEVLAHQAVGCFVTHCGW  
NSTLEALCLGVPMAVPQWVDQTTNAKFVADVWKTGVRVEVNDKGIVTREEIKKRIGEVMVGETREELRN  
NASRWKNLTREAVDEGGSSDKNIEEFISKLVC

>GWHPAAAL000532

MERDLDEMGSKNPHVLVVPFPAQGHFSPALQLSKRLASKGLRVTFVTISNAKSRGSIRMERITDDYEEG  
EEPESIEAFIERMKVVISQSLGDIIEKQKHAGYPVKLVVYDSIMPWALEIAHKLGVYGAPFTNPCTVCA  
IFYHMQGTVEVPLEGTKVSLPSLPPLEENDLPSFISNLVAPEFIKKMSLGQFSNFHKADWILLNFTFDKL  
EDEVVKWMASQWPIRTIGPTIPSMYLDKRLKEDKEYGLSLFTPNTKASKMWLDTKEQDSVVYVSFGSLAT  
LDETQIEELSWGLVNSNNYFLWVVRASEESKLPSDFMAKTLEKGLVNVWCPQLEVLAHQAVGCFVTHCGW  
NSTLEALCLGVPVAMPQWGDQTTNAKFVADVWKGVRVEANDKGIVTREEIEKQIGVVMAGETREELKK  
NASSWKNLAREAADEGGSSDKNIEEFVYELVCS

>GWHPAAAL000534

MARDLDEMGSKKPHVLVVPFPAQGHFSPTLRLSKRLASKGHRVTFVTTISSAKSSGSIRMEQITNDYEEE  
IAHKSQVYRALFFTQPYDVCAIFYHMQGTLEVPLEEIKVSLPSLPLEENDMPSPFISNLSHEI I KKT

LGQFSNFHKADWILLNTFDKLEDEVVKWMANQWPIKTIGLTIPSMYLDKQLKEDKEYGLSLFTPNIETSM  
KWLDTKEQGSVSNNYFLWVVRASEDSKFPNNFMAKTSEKRLVVNWGPQLEVLAHQAVGCFVTHCGWNSTL  
EVLCLGVPMVAMPQWTDQTTNAKFVADVWKAGVRVEVNDEGIITREEINKRIGQVMAGETREELRKNASS  
WRNLAREAVDEGGSSDKNIEEFVSKLVQMPMYNL

>GWHPAAAL000847

MASKPHFILVPLLAQGHMIPMIDTAKLLAHQGVLITITTPVNADSIKPTVNRAVNTGLEIRVARLRFPC  
AEAGLPEGCENLDMLPSPEAGIKFFNALGMLKAPMENLLGEIEPSATCIISDICPPWTMHVAKKFASREL  
FSPAPIELTKVQVPCTTNPTSAGLKDLSQIVEAEQAAYGMVNSFEEMEPEYVQYYKQVTGKKVWCIGP  
VSLCNKLDSDKAERGKRASIEDTDCLKWLDShNPDSVIFACLGLHSLSTSQLIELGLAESSNRPFIWV  
IGFVSDDELGKWLSEQRFEERNKGKGLIIHGWAQVVLILSHPSIGGFLLTHCGWNSMLEGLSAGVPMITWPL  
HSEHFYNEKLILQVLRVGVVGVVEFPVLIGEALNVGFIVKKEEIEAAVERLVGGKEAGEIRKRVGELQKG  
AKMAMKDGGSSHMRLMFIQDMVEQSSSLQKI

>GWHPAAAL001759

MENKELVFIPIPAMGHLISMLETAKLLVNRDQRLSATVLLFKLPQDAGFATYMQSLSSSAFAARLRLVIL  
PVPEKPPSESSKPDIIESHMPNVRNAVREIGESRVAGFVDMVCYKIDVADEFGFPTYTYFTSSAGYLG  
LLFHFQSLKDPYNLASNYKDWDSDKKELLVPSFVNVPPEKILPLEMLDHQVPLVLELARLLEPKGVLVN  
TFSELESHALHSLSGGNPPVYPIGPIILLASEPRYNCLQGNEESIMKWLKGKQLPSSVVFLCFGSAGSFPE  
AQIKEIAYALENSGHRFLWSLRRPQAEGQRYPTDYDDPSEVLPEGFLERTINTGRVIGWAPQVAVLSHPS  
IGGFISHCGWNSLLESLWFGVPVAAWPIYAEQHVNAFQMVRELGLAMEIKMDYRKTNSVLVTAEEIESGI  
RRLMAEECGGGGGIREKLDMKENGRMAVAEGGSSYISLSRFIENVLGPHQT

>GWHPAAAL001760

MENKELVFIPIPAMGHLVSMLETAKLLIKRDQRLSVTVLIFKLPFDTGIDTYIQSLSSSSSATRLKLVNL  
PDPQKPPSEEEEEIPKSFLSDLIDSHKPHVRNAVRIGESRVAAFVDMVCYNMIDVAGEFGLPTYTFFP  
SSAGFLGLLFLHLQILMDHHRDVS DYRDWDLKELSVPSYINPVPKVLPLAMLDKQEGGVSPVVTLARR  
LRETKGILINTFPELESHALHYLLSGGNPPVYPIGPVLLVPERSFNGVHGYNIGIMIWLENQRPSSVFL  
CFGSAGSFNEAQIKEIAHALENSGHRFLWSLRRPPPEKKIELPTDYTDPLEVLPEGFLERTVNTGRLIG  
WAPQVAVLSHPSVGGFISHCGWNSVLESLWFGVPMAAWPNYAEQQINAFQMVRDLGLAVDIKMEYRKENP  
VLKAEIEIESGIRRLMTEESGGGIREKLREMKKGRMAVAEGGSSYITALAQFIENVLRPSQMIDRKW

>GWHPAAAL001761

MENNELVFIPIPMVMGHLISMLETAKLLINRDQRLSVTVLIFKLPFDTGVDNYIQSLSSSASTSRLRFINL  
PDTEKPSSEEIPKTFMIDLKSLKPHVRNAVREIGESRVAGFVDMFCHDMIEVAEEFGLPTYAFTSSA  
GFLGLVFHVQILKDHNRQDISDYKCDKELSVPSFVNVPKVLPTTMLEKEEGGLSIVLSLARRLRETK  
GILVNTFAELESFAFNSLSCGNPPHYPIGPILLEPERSDESQGYEESIMNWLDQPPSSVFLCFGSM  
GSFKEAQIKEIAHALENSGHRFLWSLRRPPPEGKKIGFPTDYDDPSEVLPEGFIERADNGRVIGWAPQV  
AVLSHPSIGGFVSHCGWNSLLESLWFGVPVIAAWPIYAEQQINAFQMVRDLGLAVDIKMEYRKENPVLVTA  
EEIESGIRRLMAEESGGGIREKVREMKKGRMAVAEGGSSYTALSRFIENVLQPHT

>GWHPAAAL002229

MKSDAIVLYPAPSIGHLVSMVELGKILNRYSHKLGFSIIIVFLTGTGNSDNETTSYIHHVSNTNPSITFR  
RFPFVSVDTSPTRSPAAIHFD FIRLNADNVLHAIREIPNVIRALVIDFFCASAIP IARELRHPVYFFFTS  
GAYALAFYLYFPTVHKQVDQSFKHLNKTFLQFPGFPIRASHVPEPVLDRDDPAYADMVCFDHLPKSDG  
II VNTFDAL EPMACEAIASGACVPDATTPPIYICIGPLIANTSEGGGENGNASLRSSEREAKHEWLSWLD  
AQPKGSVVFLCFGSRGSFTRRQLKEMAHGLERSGQRFMWVLKSPPCDAAAPATEFCLEDVLEPGFLERTK  
KTGMVVRSWVPQVAVLNHGSVGGFVTHCGWNSVLEAVVAGVPMVAWPLYAEQHVNGAALVENMKMAIPLG  
QEKEEDDDG FVSAAELEKALRELMESEGGREERSLKMREMAA WENNGSSTSLAKFVEWLEGS

>GWHPAAAL003558

MALIPASDKPHAVCIPLPAQGHINPMLKLAKILHSRGFHTFVNTHFNRRNLLRSRGPSALDGLPDFRFD  
SIPDGLPPSDADATQDIPSLCESTPKHCLEPFCDLITRTNEDAGVPPVSCIVSDAVMSFTLKAERFGLP  
EVLFWPTSACGLLGYTYHKLVERGYTPLKDISYVTNGYMETTIDWIAGMKDIRLRDLPSFIRTTDPKDT  
MLNFLISECAAIPTASALILNTFDALERESIDALSAVHPRIYTVGPLNLMRNQINDDRIESIGSNLWKED  
PGCIEWLDSKEPGSVVYVNFSGITVVTGQLTEFAWGLANSRPFLLWILRPDIVAGDKAMIPPEFLAETK  
GRGMLSSWCLQEQLVRHQAVGGFLTHSGWNSTVESLCCGVPVICWPFFAEQQTNCRYSCREWGVGMEIDN  
NVKRDEVEATVRELMEGEKGKEMKRRAAEWKKAEEATGAGGSSQVNLEKLFSEVLLVNSDE

>GWHPAAAL004075

MSDSGNKRPHVLVPYPAPGHIIPLLDLTQLLLSSGLTVTVIVTPEFVSLLDPLLSSHPSSSIQPLVLSL  
PKAPASLVPSLRATGELYDPIQWFKSHSPPPVAIVSDFFLGWTEKLGKELGVPRLVFWASCALSSLISS  
SIWRDRPKVDDPADENFLLSFPEIPNSPKYPLWQMSTLFRMFKEGDPDWEFIREGMVANTVSWGCVFNSF  
TELEGVYIDHTKKEMGHDRVWAVGPLLPLDGAPTSRGSSAVAPHKVTWLDKDDPDDSVVYICFGSRMEL  
TTAQRDALAAALESSGVHFIWIVKAGIDGDPINPGFEDRVAGKGLIRGWAPQVPILMHRATGAFVTHC  
GWNSVLEGISAGVMMLTWPMGADQFYNANLLVDELHVAARACEGGDEKVPDSSELARLLAESVSGKRLER  
SRVVQLRDAAVEAVRGGSSSKDIDDLVKELGELGCGKA

>GWHPAAAL004076

MAISGSGKHVLIFFPYPSQGHILPLLHLAHLAARGLTITILVSPQTLPLHPLLSDHPSMETLVLFPSTH  
PSIPAGIYDCRGHLPDSVRSTLFAISDLYEPVLDWFRNHPSPPVAILSDKFMGWTIKISHANSEFIDWRSP  
LSAPWPSHWFIPIGEYRRETSAAVKMTHWFHFMRSYVEGDPISSEFIKEGMQANMASWGLVINTFNELEG  
VYLDHLKEKMGHDRVWAQMEATAIGLEKSEAYFLWSIRGSTEGVIDGEFGEVPAGFEDRTSARGLVVKGW  
APQLSILRHRAVGSFLTHNGWNSTLEALVAGVPMPLAWPMGAEQFMNATLLVDQAKVAVRVAEGARDVNP  
FELARAVTRVMDGRSVERVQAVRLREEALNAVKEGSSYQNFDDLAMHLFNNE

>GWHPAAAL005635

MATFQSESSPHILLFPFMSKGHTIPIILHLARLLIHRNAAVTIFTTPANRPFVCHSLSDTTATVVDLPFPE  
NIPGVLPGVESTDKLPRLPWLDRGIGGRIHPAARYYGMNNFSGAICHVDMTHRDLEPGSGDELFPVPG  
FPWIKVAGNDFEPALSASPPAGDGYGLQWEFTIEVVEATSKSYGVVNSFYELEPAYLNYWNSNIRPKAW  
CVGPLCLAERPRVKPENHRKPSWIQWLDEKLEEGKPVLYVAFGSQAEISPEQFREIKTGLEKSESNFLWV  
VRGGLSELIDDDGFEERVRRERGLVVREWVDQREILGHGSVKGFLSHCGWNSALESICAAVPIAWPMAE  
QPLNARMVDEIKVGLRVEACDGSVRGFVKWESLEKMOVRELMEGEMGKEVRKKVKEVGAAVAAVRGGGS  
SWKTLNELINELS

>GWHPAAAL005636

MATFQSESSPHILLFPFMSKGHTIPIILHLARLLIHRNAAVTIFTTPANRPFVCHSLSDTTATVVDLPFPE  
NIPGVLPGVESTDKLPRLPWLDRGIGGRIHPAARYYGMNNFSGAICHVDMTHRDLEPGSGDELFPVPG  
FPWIKVAGNDFEPALSASPPAGDGYGLQWEFTIEVVEATSKSYGVVNSFYELEPAYLNYWNSNIRPKAW  
CVGPLCLAERPRVKPENHRKPSWIQWLDEKLEEGKPVLYVAFGSQAEISPEQFREIKTGLEKSESNFLWV  
VRGGLSELIDDDGFEERVRRERGLVVREWVDQREILGHGSVKGFLSHCGWNSALESICAAVPIAWPMAE  
QPLNARMVDEIKVGLRVEACDGSVRGFVKWESLEKMOVRELMEGEMGKEVRKKVKEVGAAVAAVRGGGS  
SWKTLNELINELS

>GWHPAAAL005637

MAYPPPSPALHIALFPFMSKGHTIPIIHLTRLLNRGHKTTVFTTPANRPFISDSLGTGDASVIVLPFPE  
NIPGIPSGTESTDKLPMSLFFVQFANATKLIQPHFEQAISLPNLNCMISDGFLSWTLQSASKFGIPRLV  
FYGMNYSMALNYDVTNRLLSIPKSDNEPFVVPNFPWIKLTKNDFEFPFNEVEPKGPYVEFTIEQSLAT  
FNSYGLIVNSFFELEKPFVEYWNRAKPKAWCIGPLCFAEPEMIERKRKPKPKWIDWLDQKRDQGKSVL

YVAFGSQAEISQKQLHEIAMGLEKSEVNFLWVMRKDDTAIEGVPERGMVVRDWDQREVLAHEGVRGFLT  
HCGWNSVLESIWARVPI LAWPMIAEQHLNARMVVEEIKIGLRVETIDGSVRGFVKRESLEKMVRELMEGD  
MGKEVRKKVEEVGEAAGKAMTEGGSSWDALNQLIDEIKST

>GWHPAAAL005638

MASPPRSPTPHIALFPLMSKGHTIPIIHLTRLFLNHGFKTTVFTTPTNRPFISDSLSTASVILPFPE  
NIPRIPSGTQSTNKLSSIGSHQVSPQSR LHDI GR LPHKND FDEPFNEIEPKGPYAKFIMEQGVADSNSYG  
MIVNSFYELERPFEVYWNREGKLKAWCVGPLCFAEPEMI IKRQSNPKPKWIDWLDKKRDQGKSVLYVAFG  
SQAEISPEQLHKIVMGLEKLEVNFLWVKRMKDTYIVGMTERGMVVRVWVDRREALAHEGVRGFLT HCGWN  
SVLESIWARVILVWPMMAEQQLNTRMVAQEIKIGLRVEMIDGSLRGFVKRESLEKMVRELMEGDMGKEV  
RKKVEEVGRVLLGCSESVY

>GWHPAAAL006268

MTRKEVHVLVVTLPFQGHINPMLRLAKRLVSKGLYVTFATTETARQRLGSSAATSITRFQFEFFKDGL  
GPEVDRDKNLDILLLEALPTKGVENFSNL IADLSKRGRKFSCVINQFPVPWSAAVAAEHGIPTATLFIQP  
FSLFSIYYRYHKGLNLFPSLENPNNTLKLPLG LPMKVS DLP TFVRPESPYHFRKLLAESVKSLEKVKWL  
GNSFQDLEKGVLEAMEEDSINNWLPGPFLASALLGEKEEGNAVGGADMWKAEDSCLEWLDGKPVSSVY  
YVAFGSITVLDGKQMESMAAALKNSGKPFLWVVRSPAKDSDEKKSNGLPEGFIEEMKGRGLVVPWCHQEK  
VLMHPAVACFVSHCGWNSSLEAVVAGVPVIAFPEWTDQPTNAQIGVRLGENDRDFSSEEVERCIRAVTDG  
PGAAEIKRRAELKEAARKAVADGGSSERNLNR FISEISA

>GWHPAAAL006282

RHQRRRVFLPLPLQGHIPMVQLANILYSKGFQISIVHTHFNCP SRLKYPHFTFHQISDGLSETEASTED  
IIALVSLLNKKCVGPF RDCLIQLLSDDSDPIACLITDAIWHFSQAVAEG LKLRRLVLR TSSVCSFLAFA  
ALNLMRDKGYPKQDSRLEEIVPKLPLLKMKDLSFIKTKNPEDLYH SVGGMITNTRESSGII LNSFKELE  
ESSLSILKHDFPIPNFPIGSFHKYFSATSSSLLEQDRRSISWLD TQKPN SVIYVSFRSIATIEETEFLEI  
AHGLVNSNQPF LWV VQLKLVRRSDWVELLPDGLIECINRREHIVK WAPQQEVLAHPTTRGFWTHCGWNST  
LESICEGVPMICSPCFGDQFVNSRYISDVWKIGVELKNLEKEDIKRAIRRMVEKEWEDMRFRIMELKEK  
VDCSIKRGSSTESLQSLINYILSL

>GWHPAAAL006284

MDQETTLPPHVLIFPLPLQGPVNSMLKLAELLSISSRFHITFLVTDHIHRRLQHTDIKSRFEKYPGFRL  
ETISDGLSEEHPRSGDRLMELFDSLNTETKKLFRELLNSGRLISGNCRPITCIIADGIMGFTCDVANEFR  
IPIIYARTVSACCLWVFFCLPKLIEVGEIPFQGNLDVPIRSVPGMEGYLRRRDLP SFCRSGNVAGPNVQ  
VYLSSEQENPRAHGLILNTFEDLEGPILSQIRTLCPNLYTIGPLHAHLKTKLAALRSLAPASSNSLWEED  
RSCLAWLDVQPPKSVVYVSFGSLAVMSKDQLEFRHGLVNSGQRFLWVIRPD SGAGEGLIPADTNNGYI  
VGWAPQEEVL SHASVGAF LTHSGWNSTLEATIEYEGKPMICWPYFLDQQVNSRFVEKVGWLGVD MKD ICDRV  
VIEKMVRDLMDERGGGYKQADQIAKLANECFKAGGSSYSLENLVKDIELMMKSYCAEFGHCVKVRTRK  
NQPHKREREREERVV LKPCALFRSNADWRTI HRLIKLKFGQQVRNSVLYNLNGGNRILGSATTVSAGLF  
WVVFKPAPW

>GWHPAAAL007266

MASKTDRLQFLLIPLMSQSHLIPLTDFAKLVARRGISVTIITTPLVNHRFKSIIGRTPNADLKIHLLSIP  
FPCKEAGLPEGVENVDSLDSPE SAGKFFLASSLLKYPLEKLVSEMDAKPNCIVSSNALPWTVKLGEKFGI  
PTYFFNPISCFTVVCSTNIIAGKPHEAVSSDSEPFVDPMPHRIEFTRAQLPENMRKGDSTDDVKAVMQQ  
IRDAVSSARGVLNSFEELEAPYIQSYKKT VKNLWCVPVSLSNDESPPSSTTDERIDCLKWLDSMNPS  
VIYACFGSISRIPASQLIEIGLGLASRTPFLWIIKEKDISEPVQKWLDDEKFEERIRGRGLIKTWAPQ  
VQILAHPAVGGLTHCGWNSTLEGVCAGLPMITWPMIAEQFYNEKFIVNVLGVGVRIGAEGGMESGAFVG  
REEIKKAVVELMGGEEERE GGGDRRRKARELGEMAKRAVADGGSSHLNISFLIQDVMQQS

>GWHPAAAL007326

MGSQKPHVLVVPFPAQGHFSPALQLSKRLASKGVRVTFVTTMSWAKSIGSIRMEQISDGYEERENPESIE  
AFAKRIKTVISQSLRDLIEKQKQVGYPVKLVVYDSAMPWALEIAHKWGVYGAPYFTQHCTVCAIYYHMQQ  
GNLKVPLEGTKVSLPSLPPLEKNDLPSFICNLFPEFLMKEMLNQFSNFHNADWILFNTFDKLEDKVVKW  
MASQWPIRTVGPTIPSMYLDKRLEGDKEYGLSLFTPNTASMKWLDTKEQGSVVVVSFGSLATLDETQME  
ELSWGVLQSNNYFLWVVRTSEESKLPSNFMDKTFEGLVNVNCPQLEVLAHQAVGCFVTHCGWNSTLEAL  
CLGVPMVAMPQWVDQTTNAKFVADVVRVGVVVEANDKGIVTKEEIEKRIREVMAGETREELRKNASGWKN  
LAREAVDEGGSSDKNIEEFVSQVCS

>GWHPAAAL007393

MADDSKHLFVMFPWLAFGHIIPFLELSKFLAQKGHKISFISPRNIDRLPKIPTNLPIKLVKIPLPIEE  
LPENAEATMDVRTDDIHYLKKAYDGLSEGLTRFLESESPDWIVMDFAPHWLPPIAAKLGISRFFSIINA  
WFLVFLGASSEAMINGSDELTAPEDFTVPPKWVPFPTKAAYKLYEANWAFQSTKLNASGFTDMYRCGSI  
QGIDAILVRHCNEFEPEWLTLENLHGRRVIPVGLMPRRQNNQDDTNETWVSIRDWLDQNRCSVVVVA  
LGSEVALSQEQLSELALGLELSGLPFFWALRIPRNPVDLPDGFEEPMKSKRQGMVWKAQVQVQKILSHD  
SVGGFLTHCGWSSIEGLMFGKPLIMLPFLVDQGLNARLLAAKEAGVEVDRDEESGAFTKETVAEALRLV  
MVESERGGKVLNRGKAKEMGVVFGDKDLHDLYLENLVVYFENHRLCKES

>GWHPAAAL007798

MASQKNDNGAHVLAIPWPAPGHMNPLLQFCKRLVFRGGIKATFAITKFQSKSMHSRLDSIQIDTISDGYD  
DGGFFITAGIQESVEQFKAAGSKSLAELIKKHESMGQPFDCI IYDAFVPWVLEVAKEHGIAGAAFFTQTS  
AVNCVNYHVYHKLIPYPFDSPPYSLPGLPPLGLQDMPGFMTVDPYVYELVLSQFSTPQQADYLFVNTFYH  
LEAEAVEAMLKVHPLLKTIGPTVPSYYLDNRIENDKSYGLHATHLMFQEKNSQTDPSLVLDWLNTKPHA  
SVVYVSFGSIALASPSTDEMKEIAWGLKNTGCYFLWVVKANEEPNLPKNYREATREKGLIVSWSPQLEVL  
EHEALGCFVTHCGWNSTIEALCLGVPMVAMPKWADQPTNGKYVDVWKIGERVKVDENGAVAGKEEVERCI  
RAVMEGESGKEFKKNAKWKELAKEAVNEGQTQDNIDEFASKL ISSSHRS

>GWHPAAAL007799

MATQTKEYGAHVLAIPWPAPGHMNPLLQLCKRLVLKGGIKATFAITKFQSKSMYSTLDYIQVDTISDGYD  
EGGFFIVDGITASVEKFKAAGSESLAELIRKHEGLGQPFDCI IYDAFLPWVLDVAGEFGISTAAFFTQKC  
SVNCINHHVLKKLIPYPFTSEPI SIPGLPLLNIEDMPGF IHVDPELYELVQSQFSTPELADYRLVNTFYE  
LESEAVEAMSKIHLRTIGPTIPSYLDKRIENDSSYGLHATHLMFQEKNASRVEPSVVLNWLDAKPTGS  
VVYVSFGSVS IASPGPDEMKEIAFGLKNTNFHFLWVVKPNEEPNLPENFKEEMADKGLIVSWSPQLEVL  
HKALGCFVTHCGWNSTIESLCMGVPMVAVPKWADQPTNAKYVEDVWVGIRVKVDENRFAGRDEVERCIR  
AVMEGERAEDLKRSALKWKELCIKAVAEGSSDKNMEEFASELITRKSASK

>GWHPAAAL007800

MEEKQGTSDRVHVLVVPFVQGHINPMLQFAKRLASSGLKITVIGTTKTTVSR SIPNIEIERIPDAPGEA  
ADQQNTETIEHCERLTTVLSNFSVKLIEKQSGLGCPYRVLVYDSVMPWALELAHRRGLKAAPFFTQSCS  
VSALYYHMNRGSLKVPPVGSSEFVEVPALPPLKVGDLPSFIYDMGSYPFILKMVVNQFLNFEKADCLLFN  
TFDKLETMTWMANQCPTIRTIGPTLPSVYLDKRLNEDTDYGLSLFNPRESSIQWLHKSPTASVVYVS  
FGSLANLSETQMHELAFGLERTDSHFLWVRSELTKLPPGFPTAPEKCAVVNCPQLEVL SHPAVGC  
FVTHCGWNSMLEALSLGVPVAMPQWTDQTTNAMLAVEVWGVGVRTAADKKGIVRREEVEMRVREVMENGR  
EGLKSNAGRWKELAREAMDGGSSD

>GWHPAAAL007936

MAENTHVVMLPWSAFGHIIPFFHLSIALSKAGIHVSFVSTPKNIRRLPQIPDSVPFIDIVELPLPEIDR  
SLLPEDAEATVDIPTENIQYLK IAYDLLKKPFSRFVADRSPDWIVIDLMPYWAADVAKFEDIPVIYFSMF  
CAAASAFFSRPEFIAGEGQKMKRSTPESLTSTPEGVDFPSTVAHRHHEPLSFHGENASGISDASRFARTL

HSCRALAIRSCPEFEHDDLNLLEKIHQKSVIPVGLLLPEQKSEARNSGDEFKIFKWLDQQKPKSVIFVGF  
GSECKLTENQIHEIAYGLELSELPFLWSLRKPSYSTDEVDPDPPDFHRRIAEKGLVHVGWAPQTEILAH  
SVGGSLFHSGWGSVIETLQFGHRLVVLPLIIDQPLNARLLVEKGLATEVERGGDGSFGRDAIAKALREAM  
VMEGGERVREAMEIFGDRKLQENYVERFAEYLKNGVAKKNQ

>GWHPAAAL007941

MAKNTHVVMLPWSAFGHIIPFFQLSIALTKAGIHVSFVSTPKNIRRLPQIPSDSVPFIDLVELPLPEIDR  
SLLPADAETVDIPTENIQYLKIAVDLLKKPFSRFVADRLPDWIVIDMMPHWAVDVAKEFDVPVIYFSVF  
GAAAAVFWGPPEYIAGEGQKMKRSTPESLTSTPEWVDFPSTVAYGHNEAVSFHAGAYGENASGISDAGRT  
ARILHSCRALAIRSCPEFEHDYLNLEKILQKPVIPVGLLPPEQKSEPRNSGYEFKIFKWLDQQKPKSVI  
FVFGGSECKLTENQIHEIAYGLELSELPFLWSLRKPSYSTDPLPPDFHRRIAEKGLVHIGWAPQTEILAH  
PSVGGSLFHSGWGSVIETLQFGHRLIVSPLIIDQPLNARLLVEKGLAREVERGGDGSFGRDAIARALREA  
MVMGGERVREAMAIFGDRKLQENYVERFAEYLKIGVAKEN

>GWHPAAAL008406

MSVHVLIFPYPAQGHLLPLDLTHQLALHGLTITILVTPKNRPTLDPLLSTHPSIGTLVLPFPHHPAIPS  
GVENVKDLGNSGNVLVINALSCLRDP IIQWFKAHNPVPVAIVSDFFLGWTNDLAGQLGIPRAFYSSGAF  
LTSILFHFIYRELRSAAAPVL TAVKFTDLPRSPSFTEAHLPTIVRHYRESNPEWELLKEGVIANSSWSGSIL  
NTFDDLEGEFLEYLKKKMGHNRVYGVGPLNLGRVNTDPDADPSNTVLGWLDGCPDGSVIYVCFGSQKFLK  
KAQIEALALGLERSKARFIWVVKPITAQQEADGYGSILDGFEERVSGRGMVIGWAPQVKILSHRVVYGF  
LSHCGWNSVLEAIAAGVMILGWPMEADQFVNARLLVDYMGAAIRVCEGADSVPSDELARTIAESVDGNK  
QEKGRARELRDKAWEAVGPCGSSTKDLVG FVKDLAQLDENG V

>GWHPAAAL008407

MGNPHVLVVPYPAQGHV IPLMELAHSLAQHEFRVTFVNSDFTQDRV TGSSPEKNGFGEDSIRLVSI SDGL  
EPSEDRNELGNLTESI FRVMPAKLEELIMEINGSDGEVACVIADISMAWMEVAAKMGIRRAAFCPMSA  
AMLGLVYNVPKLMEDGI INDDGTPTKNEVIKLTDPMPAMNTANFPWACIGDLATQKKIFDVTLTGRPALD  
LADRIICNSSSGLEPAVFDQYPQFLPVGPLLRSSGGNFWQEDSTCLDWLDQQPPKSVIYVAFGSFTVFD  
TQFRELAKGLELTDRPFLWVVRDSAVKYPEGFEKI IGTGRRGKIVEWAPQKKVLSHPSVGCFLSHCGWN  
STVEAVSNGVPLLCWPYFADQSFNQSYICDVWVKVGLGFGKDENGLI IFEEIKKKVDEIFGDENYRERALD  
LKQKVM DGVKEGGCSNRNFSKIMGWITQINNGLSS

>GWHPAAAL008878

MASPSPHFVLLPFLAQGHLIPMIDISRLAKRGVVVTIITTPLNAKRFERIITREIDSGLQIRVVQLHFP  
CVEAGLPQGCENFDHLTTMASAGQFLEATRMLQKPVEDLFEGLSPPTCLLSDMCYPWTTLVAEKFSVPK  
LVFHGMCCFSLFCNHVLYTSRVFDTVASETEPFAVPGMPDHIELTKTQVPTLVNMNTSSGVKDVRKEIKE  
GELSAYGVVVNTFEEMEEKYVKEYAKAMGKKVWCIGPVSLCNKNNLDKADRGNKASIDEHHCLKWLDSWE  
QGSVVYVCLGSLTRLATSQMIELGLGLEASNRPVWVIRYEIVEFEKWILEEGYGERIKGRGLLIHGWA  
PQVLILSHRAIGGFLTHCGWNSTMEGICAGVPMLTWP IFAEQFVNEKLVVHVLKTAVSVGVKIQIYPGNEE  
EVGILLRREDVKMGIDKVMEEKEEGEERRRRARKFGEMAKWAIIEGGSSHNL TMLIQDVMESNQLRKD  
G

>GWHPAAAL008879

MASPSPHFVLLPFLAQGHLIPMIDISRLAKRGVVVTIITTPLNAKRFEGIIARAIDSGLQIRVVQLHFP  
CVEAGLPQGCENFDHLISMASAGQFFEATRMLQKPVEDLFEGLNPPPACLLSDMCYPWTTLVAEKFSVPK  
LVFHGMCCFSLFCTHVLQTSRVFDTVSSEIEPFAVPGMPDFVELTKNQVPAFVNMINIPSGQKDVRKEIKE  
GELSAYGVVVNTFEAMEEKYVKEYARAMGKKVWCIGPVSLCNNNNLDKADRGNKASIDEHHCLKWLDHWE  
QGSVIYVCLGSLTRLATSQMIELGLGLEASNRPVWVIRYEIVEFEKWILVEGFGERIKERGLLIRGWAP  
QVLILSHRAIGGFLTHCGWNSTMEGICAGVPMLAWPMFAEQFVNEKLVVHVLKTAVSIGAKIQISIGKEE

EIGILVRREDVKMGVDKVMEEENEERGEERKRRARKFGEMAKWAIEEGGSSHNSLTMLIQDVVEKSNQLRKH  
G

>GWHPAAAL009069

MAYPPSPALHIALFPFMSKGHTIPIIHLTRLLNRGHKTTVFTTPANRPFISDSLGTGDASVIVLPFPE  
NIPGIPSGTESTDKLPSMSLFVQFANATKLIQPHFEQAIKSLPNLNCMISDGFLSWTLQSASKFGIPRLV  
FYGMNYSMALNYDVTNRLLSIPKSDNEPFVVPNFPWIKLTKNDFEEPFNEVEPKGPYVEFTIEQSLAT  
FNSYGLIVNSFFELEKPFVEYWNRAKPKAWCIGPLCFAEPEMIIERKRKPKPKWIDWLDQKRDQGKSVL  
YVAFGSQAEISQKQLHEIAMGLEKSEVNFLWVMRKDTAIEGVPERGMVVRDWDQREVLAEHGVRGFLT  
HCGWNSVLESIWAVPILAWPMIAEQHLNARMVVEEIKIGLRVETIDGSVRGFVKRESLEKMVRELMEGD  
MGKEVRKKVEEVGVAAGKAMAEGGSSWDALNQFIDEIKAQGSNPIN

>GWHPAAAL009324

MDRSASSKLHIAMFPWFVAVGHLTPFLHLSNEIAQRGHKISYLLPRKAHIQLSQNQHPDLITFYPLAVPP  
VAGLPSTGTETASDIPISQTGLLATAMDHMRGEVEEIFRSLRPDFVFYDLAHWITELGSSIGFKTVCYNVV  
SAASLAIALVPARVVPKDRKVTVDLAVPPKGYPSSSVLRPHEARSLLFISSEFGAGGVTFYERVIAAM  
KNCDAIGIRTCRETEGSLCDYMGTYNKPVLLTGPILPEPSKAQLDDRWSWLNKFPPKSVILCTFGSQI  
VLEKQGFHELVLGLESTALPFLAAVRTSAGEALPEGFENRVGERGVVYGGWVQQPLILNHPVSGCFVSH  
CGFGSMWESLMSDCQIVVPHLGDQILNARLLAEEMKVAVEVERDEKGFWSRERLGGAIKTMERESEAG  
EVVRKNHAKWKEIMVKPGFMSNYVENFIEKLHEL

>GWHPAAAL009436

MGSIPASDKPHAVCIPYPAQGHINPMLKLAKILHSRGFHTFVNTHFNRRLLHSRGPSALDGLPDFRFD  
SIPDGLPPSDADATQDIPSLCESTPKHCLEPFCDLIARTNEDAGVPPVSCIVSDGVMSFTLKAAERFGLP  
EVLFWTTSACGLLGYTQYHKLVERGYTPLKDVSYVTNGYMETTMDWIAGMKDIRLRDLPSFIRTTDPKDT  
MLNFLISECAIPTASALILNTFDALERESVDALSIAHPRIYTVGPLNMLNQNINDRIKISIGSNLWKED  
PGCIEWLDSKEPGSVVYVNFSGSITVVTAGQLTEFAWGLANSRPFVWIVRPDIVAGDKAMIPPEFLAETE  
GRGRLSSWCPQEQLRHPAVGGFLTHSGWNSTVESLCSGVPVICWPFFAEQQTNCRYSREWGVGMEIDN  
N

>GWHPAAAL010110

MGEKQPELQKQQRQLRLVLFPLPFKGHINPMLQLAAILHANGFPISILHTTFNSPTPSDHPHFDHPIS  
VDGLSETDSPTPDLVDLLELLNQCAAPFRDCLEKLTSEEPVACLISDAILHCTATVADSLRIPRIVLRT  
GGVASFLAFASFPLLLDKGYLPIQESRLEEAVPELPPLRIKDLPVINTGKPEALYHLLAEMIKTAKNSSG  
LIWNTFDELEQPELSKLRRFPPIFPIGPFQKHLTSTHEDRSSISWLQNQPSSVIYVSFGTIASMS  
EESQFTEIAHGLADSLHPFLWVVRPGLIRGSEWLKNLPDGFLEGRGKIVKAPQAEVLAHPAVGAFW  
THSGWNSTVESISEGVPMICMPCFTDQLVNARYVSHVWVGLTLEGGIERGKIERVMRRVMGEEGKEMRK  
RIILCMKERVNVCLRKGGSSHQSLHNLVSYISSL

>GWHPAAAL010292

MEDVPAGKPHAILVAYPLQGHVIPAVHLALNLASRGFTITFVNTQSIHHQITHRPSGKAAAAVDDIFAA  
IRESGLDIRYTTVPDGLPAGFDRSLNHDQFMAALLHVFSAHVEEAVDEIVRAGPPVSCLADTFFVWPGK  
LAKKLGVVYASFWTEPALVFTLYYHLDLLRIHGFGCIELRDDIIDYIPGVKSIEPKDLTSYLQQSDSST  
VCHQIICNAFNDVKTAADFVLCNTVQELEPQTITALQSKTPFFAIGPIFPGSGFTTNVSTSLWSESDCTH  
WLDKAPDGSILYVSFGSYAHVEKNDLVEIANGLLLSKIEFLWVLRPDIVNSDDSDPLPEVLKEEIGNRGM  
IIPWCNQRLVLAHRAIGGFLTHCGWNSVLESVWCQIPLLCPLLTQFTNRKLVDDWKIGTNLCKRPI  
TRGEVCEKIKEVMSEKSGNEFREKIKEVKNKLENALGANGSSTKNMDQFIKDLKATIQQKRGGTS

>GWHPAAAL011043

MENNIEKPPHAIMFPYPLQGHVIPFVHLAIKLASNGFVVTFVNTQSIHHQISQSRTPDAGADIFAGARNS

GLDIRYKTVSDGLPVGFDRSLHHDQFMESLLHIFSAHVDELVGEMVASGDPPVSCLVADTFYVWPSTVAK  
KYNLVNGSFWTEPALVLTLYHLDLLRQNGHFGTTDSCKDNIDYIPGVPSMKPTDLMSYLQIDTSTVVHR  
I IYKAFNDVKSADFILCNTIQELEPETISALHKKQPTYAIGPIFPVAFNTSSVATSLWAESDCSQWLNTK  
PHGSVLYISFGSYAHTTKHDIMEIAYGLLLSGVGFVWVLRPDIVSSDDVDFLPVGFDENIKGQGLIVPWC  
RQIEVISHPAIGGFLTHCGWNSILES VWYEIPLICFPLLTQFTNRKLVDDWKIGINLRDEKSITREEV  
SKKINYLINETSQNRKEIRKVRVLLLEDALANDGSSQNNFNQFIRNFKDKLVNKKK

>GWHPAAAL011200

MTIGGAGDHILVFPYPAQGHMIPLLDLTHQLAIRGLTITVLVTPKNLPLLDPLLSEHESVATLVLPFPVH  
PSIPAGVENVKDLPVGGFRAMMVALGELHDP LLRWFNQPSPPKAIWSDMFLGWTHHLARRLGIRRFVFS  
PSGAMALSVIYSLWREFRRRDSNDYNEKFSFPKIPNSPIYPWWQLSPIFRSYVAGDPDEFIKDGFLAN  
IASWGLVINSVSELERVYLEYKLGELGHRVWTVGPLLPPDGDLSRTVERGGSSSVLTNQISSWLDKCN  
RTVVVYCFGSQAVLSNDQMEHLASGLEKSGSKFVSVKGATTGQEKGSCGQVPLGFEEVSGARGLVIRGW  
APQLLILNHRVGAFLTHCGWNSLLEGLIAGVPMALWPMGADQFANASLLVDELRVAIRLCEGAQVVPSS  
NELARLVTEATGGDWPERGRAEELRKVALGAIKDGGSSFNNLNDLVRHISEIV

>GWHPAAAL012110

MEESKKEEHIVMLPFMAQGHILPFLELATQIHQSTAFTVTIATTP LNTQYLKSTAAKQNPSPESPAPAI  
HFVSLPFNSSDHGLPPNTENTESLPTQIISLFHASSSLKPHFQDLIAGIADKEGKPPICVISDVFMGWA  
NEVALSFGTVNVSFTTGAYGTAAYVSIWQNLPHRSRDSNDEFSLPGFPESRRFHISQLHQFLRAADGTD  
EWSLFFQPQISLSMGSFGWLCNTVEDIEPLGLEILRRYTKLPVWCIGPLLPRKMLQRSSSSNSGVIGPRS  
GKLPGV SPEKCI EWLEFHPPASVLYISFGSQNTISATQMMELAHGLESSGKPFIVVVRPPVSGDPNSQFK  
SSEYLPEGFERRAAENNRGLLVHKWAPQLEILSHKSTGAFLSHCGWNSTMESLSQGVPIIGWPLAAEQSY  
NAKMLEEEMGVCVELTRGVQSTIERDKVKKVIELVMGEKGKGEEMRKAAAIGEVIRASVMEEGEGRKKG  
SSVQAMDDFISTLISNREQSFPHPL

>GWHPAAAL012139

MEERRENIVMFPFMAQGHMIPFLALALQLEKKGYGITFVNTPLNVKLKRLQCLPPDSSIRILEIPFNSSDH  
GLPPNSENTDVLPTYLIVNLLHASLSLESSFRKLLSDLIHEQGGVRPLCVIADIFFGWSAGVARELGVFH  
AIFSGAGGFLACYSAWLSLPHRTTDSIEFTLPDFPEASKFHVTQLPASMLAADGTDLWSIFQRKTLPA  
WTNSDGVLFNTVEGFDKGLAYFSRKIGKPIWAIPTLLSVHHRARVGGREAAITPEQCAEWLDSKPPNS  
VIYVSFGSQNTISASQMMQLAKALDKSEKNFIWVVRPPLGFDINSEFKPEEWLPEGFTDRIKDQNRGLIV  
IKWAPQVEILSHKSIGAFISHCGWNSVLEALSNGVPLIGWGMAADQFFNVKMLEEAVGVCVEVARGTIFE  
VRHEDIMEKIEVVMGESEKGKRIKRAGELKEI IKDATRDEEGFKGSSVKAMDEFLSAAAMSMKEKKTLL  
VETQ

>GWHPAAAL013261

MASEFHHAHFVLIPLMSPGHIIPMVDMAKLLARRGVTVTLIMTQHSATRFASVVDRAIKSGLPIRLLEFR  
FPSKEAGLPEGCDSDVDIPSYDLLNFFNAIDMSQNPLEQLIEHLEPNPSCIVCDKHIAWTAETAKKFNI  
PRIIFDGMSCFSQLCVHNLHVSKVHERFQGSEPFVLPGLPDEIVITRAQLPGTFNPGSMKNLDEIRKVR  
ETEKEAYGVVNSFEELEQRYVNEYKKVREDRVWCIGPLSLCSNETSDMANRGNTASIDANHCFKWLD  
SRQPRSVIYACLSLRLTPPQFIELALGLESTNQPFILVIKAGDKVKEIETWISENGFEERTRE RGLLIRG  
WAPQVLILSHAAVGAF LTHCGWNSTLEAVCAGVPLITWPLFSEQFLNEKFAVQVLKIGESVGARVAVGLG  
EEKSGVKVEREEVEAAARLMEEGEEGGRRRRARELAEMAKRAVEEGSSHLNMTVMIQDIVSIKREE  
T

>GWHPAAAL013365

MSTPTDNGEKLHIVMFPWLDFDHMIPFLELAKLIAKKGHKLTYVSTPQNIRWLPNPPLNWWLLPLPIVES  
VPD NAKATVDVPSGKVSCLVDAFDRLETELTRFLEASMPDWIIYDFAPPWLP TVVGNLGISRAFFNVRNA



SFVYSMIKGCPLNDIIIGPLGVHRLWSRCDVFATRDCTEFEPHCLNTRLKVTQKPVIPVGLMPSLVHDSE  
DDKTYTWLAINDWLQKQNKESVAYVALGIEVFKNQESLSEMAIGLELSSLPFLWALRRPHGSTELGSVKL  
SLGFEERTKARGIVCRTWVPQAKVLAHGLVGCMTGCGWSSVIEGLQFGRSLLMMPFTEEQRNLNTRVCVK  
KNMGIEIAQVGSLTRNSVADTLKLMSNDNNEGKLIREKVKMMNWIFGDKARHDLYMDNFVDYLQNYRSL  
NKVP

>GWHPAAAL013653

MTSPSSSPSLPHVFMVSFPGQGHVNPLRLGKYLASKGLLITLCTPEIFGKQIRKSNPIIAGENPIKIG  
EGFIRFEFIQDDLEEDDPIFKDFDLYFPDLEMKGKAALQRMIEENKVMGRPVSCLINNPFIWVSDVAEA  
MAIPNAMLWVQSCACFAAYYHYGKGSVPFPSELELDVQLPAMPLLKHDEIPSFLHPTTPYTVFRRAIM  
GQYRNLSYPFCILMDTFMELEELIENMSEICPVKPVGPLFRNAGGYGSEIRGDMMRADDEECLKWLD SMP  
ECSVVYVSFGSIVSLKQTLDEFAAGILNSGV SFLWVVKPVPEKPVKLPEVFLEKAGDRGKIVEWSPQE Q  
VLAHPAVACFVTHCGWNSSIEAVANGVPVVAFPQWGDQVTNAKYLVEVFGVGLRLSRGEAENRTVTAKEV  
ERCLLEATSGGKAAELKEKALKWKKKAAEEAVAEGGSSNRNMKDFVEEVKRRSI

>GWHPAAAL013654

MVSPFPSSSLPHVFMVSFPGQGHVNPLRLGKYLASKGLLITLCTPEIFGKQIRKANPIIAGENPIKIGEG  
FIRFEFIQDGLEEGDPIFKDPDLYFPDLEMKGKAALHRMIEENKEMGRPVSCLINNSFIPWVSDVAEAMA  
IPNAVLWVQSCACFAAYYHYGKGSVPFPSELELDVQLPAMPLLKHDEIPSFLHPTTPYTVFRRAIMGQ  
YRNLSYPFCILMDTFMELEELIENMSEICPVKPVGPLFRNAGGYGSEIRGDMMRADDEECLKWLDLMPEC  
SVVYVSFGSIVSLKQTLDEFAAGILNSGV SFLWVVKPVPEKPVKLPEVFLEKAGDRGKIVEWSPQE QVL  
AHPAVACFVTHCGWNSSIEAVTNGVPVVAFPHWGDQVTNAKYLVEVFGVGLRLSRGEAENRTVTAEEVER  
CLREATSGGKAAELKEKALKWKKKAAEEAVAEGGSSDRNMKDFVEEIKRRSI

>GWHPAAAL013655

MVSPFPSSSLPHVFMVSFPGQGHVNPLRLGKYLASKGLLITLCTPEIFGKQIRKANPIIAGENPIKIGEG  
FIRFEFIQDGLEEGDPIFKDPDLYFPDLEMKGKAALHRMIEENKEMGRPVSCLINNSFIPWVSDVAEAMA  
IPNAVLWVQSCACFAAYYHYGKGSVPFPSELELDVQLPAMPLLKHDEIPSFLHPTTPYTVFRRAIMGQ  
YRNLSYPFCILMDTFMELEELIENMSEICPVKPVGPLFRNAGGYGSEIRGDMMRADDEECLKWLDLMPEC  
SVVYVSFGSIVSLKQTLDEFAAGILNSGV SFLWVVKPVPEKPVKLPEVFLEKAGDRGKIVEWSPQE QVL  
AHPAVACFVTHCGWNSSIEAVTNGVPVVAFPHWGDQVTNAKYLVEVFGVGLRLSRGEAENRTVTAEEVER  
CLREATSGGKAAELKEKALKWKKKAAEEAVAEGGSSDRNMKDFVEEIKRRSI

>GWHPAAAL013658

MVSPFPSSSLPHVFMVSFPGQGHVNPLRLGKYLASKGLLITLCTPEIFGKQIRKANPIIAGENPIKIGEG  
FIRFEFIQDGLEEGDPIFKDPDLYFPDLEMKGKAALHRMIEENKEMGRPVSCLINNSFIPWVSDVAEAMA  
IPNAVLWVQSCACFAAYYHYGKGSVPFPSELELDVQLPAMPLLKHDEIPSFLHPTTPYTVFRRAIMGQ  
YRNLSYPFCILMDTFMELEELIENMSEICPVKPVGPLFRNAGGYGSEIRGDMMRADDEECLKWLD SMPEC  
SVVYVSFGSIVSLKQTLDEFAAGILNSGV SFLWVVKPVPEKPVKLPEVFLEKAGDRGKIVEWSPQE QVL  
AHPAVACFVTHCGWNSSIEAVTNGVPVVAFPHWGDQVTNAKYLVEVFGVGLRLSRGEAENRTVTAEEVER  
CLREATSGGKAAELKEKALKWKKKAAEEAVAEGGSSDRNMKDFVEEIKRRSI

>GWHPAAAL014206

MAKNTHVVMLPWSAFGHIIPFFQLSIALTKAGIHVSFVSTPKNIRRLPQIPSDSVPFIDLVELPLPEIDR  
SLLPADAEATVDIPTENIQYLKIAYDLLKKPFSRFVADRLPDWIVIDMMPHWAVDVAKEFDVPVIYFSVF  
GAAAVFWGPPEYIAGEGQKMKRSTPESLTSTPEWVDFPSAVAYGQNEAVSFHAGAYGENASGISDAGR  
ARILHSCRALAIRSCPEFEHDYLNLEKIHQKPVIPVGLLPPEQKSEARNSGDKFKIFKWLDQQKPKSVI  
FVGFGSECKLTENQIHEIDYGLELSELPLWLSLRKPSYSTDELPLPPDFHRRIAEKGLVHVGWAPQTEI  
LAHPSVGGSLFHSGWGSVIETLQFGHRLVVLPLIIDQPLNARLLVEKGLAIEVERGGDGSFGGDAIAKAL

REAMVMEGGERVREAMAIFGDRKLQENYVERFAEYLKNGVAKNR

>GWHPAAAL014233

MEERRENIVMFPFMAQGHMIPFLALALQLEKKGYGITFVNTPLNVLKLRQCLPPDSSIRILEIPFNSSDH  
GLPPNSENTDVLPTYTLIVNLLHASLSLESSFRKLLSDLIHEQGGVRPLCVIADIFFGWSAGVARELGVFH  
AIFSGAGGFLACYSSAWLSLPHRTTDSIEFTLPDFPEASKFHVTQLPASMLAADGTDLWSIFQRKTLPA  
WTNSDGVLFNTVEGFDKLGLAYFSRKIGKPIWAIGPTLLSVHHRARVGGREAAITPEQCAEWLDSKPPNS  
VIYVSFGSQNTISASQMMQLAKALDKSEKNFIWVVRPPLGFDINSEFKPEEWLPEGFTDRIKDQNRGLIV  
IKWAPQVEILSHKSIGAFISHCGWNSVLEALSNGVPLIGWGMAADQFFNVKMLEEAVGVCVEVARGTIFE  
VRHEDIMEKIEVVMGESEKGKRIKRAGELKEIIKDATRDEEGFKGSSVKAMDEFLSAAAMSMKEKKTLL  
VETQ

>GWHPAAAL014996

MEITDGETGSSQNRVLVIPFPSQGHINPMLQFSKRLAAKDRRRSLGITLVTSTTKFSALSQPPTSVSVE  
YLPDDSDDDQDDVGAFRRFEKTVTEGLPGLVERLKNSGSPARVVYDSIIPWVLDAHPLGLKGACFF  
TQTCAVCAIYYHVHRGTLTPSEEEEEEDHRSSVTLPGMPLMEIKDLPSFVYDIDQYPYALRLLLAQFSNT  
GEAEWIFFNTFDKLEHEVIDNWAAREWPRMKSIGPTIPLAYLEEDNTLQNDIDYGLNLLDSNFEACMNW  
LDAKETASVAYVSFGSVANLNNEQMEELAWGLISSGTHFLWVVRASEESKLPPNFTDQALENGLIVNWCP  
QLQVLAHRAVGCFVTHCGWNSTLEALSLGVPLVAMPHWSDQTTNAKYVSDVWKVGVRARGVEKGAGVVGR  
AEIERCVKEVMEGESGDEVRRNAVWKEAREAVAAGGSSDNNIQEFVSQVLVKL

>GWHPAAAL015368

MTNTNRVELVFIPSPGMGHLVSAVEMAKLLVDRDQRLSITLLIMKAPFKTKANYSPAQSLSTAAASRIRF  
VDLPGELESDAKFSPHTFLSGFISGQKTLVRDAVAQISSSPEAPLAGFFIDMCTSMIDVADEFVRVPT  
YVFFTSGAAFLGLVFHLQTMRDDHNHDVTELKDSADLLVPCFVKSVPTKVLPSVVLKKEGGSEMFDLV  
RRIRETKGILINTFSELESHAIHSINTPPVYPVGPILNVAGDNDNESTASAAILKWLDQPPSSVFLCF  
GSMGCFGVDQVNEIAHALERSGHRFLWSLRRPPPEGKLEFPDYNLEEVLPERFLERTAEIGRVIGWAP  
QAAVLAHRAVGGFVSHCGWNSTLESVWYGVPMAAWPQYAEQQLNAFLMVEELEMAVEIKMDYRNGFYSKS  
GVALRSEEIEKIGIRLMECGENGMRKKVEEMREKSRVAVREGGSSYLSIGRLIEDVMKIVEQ

>GWHPAAAL015516

MAYHHPRQTQPQVAVVVVPFPAQGHLNQLLQLSRLISFYHIPVHYVGSATHNRQAKLRNHGWDPLSATNI  
HFHEFSTPHFLSPPPDPHAAVKFPSHLQPSFEASSHLRRPVAALMRELSQKFRRIIIVNDSLMSGSVVQDF  
VSLQNADAYTFHVSFAFAMALFFRESTGKHFSVHAELLNGVPSLDGCFTADFLNFLKTQHYYTQFSSGRI  
YNACRLIEAPFLDILSQDHDTAINKNKKHWALGPFNPISITHNKRPNRHKCLEWLDKHDQNSVILVSFG  
TTISLSEEQIKELATGLEQSGQKFIWVLRDADKGDVFNEEDEVRRAELPKGFEEDRVEGRGLVVREWAPQL  
EILGHPSTGAFMSHCGWNSCMESITMGVPMAAWPVHSDQPRNAVLTKFLKIGLPVKDWARREDEVVIALT  
VENAVKKLMAAEEGREMRKRAEELGGAVRRSAAEGGASCKEMDAFIAHITRI

>GWHPAAAL015754

MSGDRKLHIVMFPWLAFGHMIPYLELAKLIAEKGHKISFLSTSRNIDRLPKLPPHLTPVIDFVKLQLPHV  
EGLPENAEATSDVPYNKVYKLVAYDLLQEPIARFLRISSPDWVLFDFVSYWLGPIASELRIPSAFFSIF  
IPAFLGIFGPVPVLKGTDEARTKPEDFTVSPKWVPFKSTVAFRLFEIQRIFDSVTGDEMNPDTYRAGCT  
IESCDIIAIRSCHEFVPEWIKVLEEIHQKPVIPVGQLPTTAYDGGEDDKDGWEKMKEWLDTKEKKSVVY  
VAFGSEAKPSQAELEIALGLELSRLPFFWVLNRNRGNADTEPIQLPEGFEERTRGRGWVCTKWAPQLKI  
LSHDSVGGFLTHSGWSSVEAVQFERALILLTFLADQGLNARVLEEQKMGYSIPRDDRDSFTRDSVANS  
VRLVMVEEGGKIYREKMKEMLGVFGDRDRQDGYVENFLRYLQNYKIPTSDEPNKKE

>GWHPAAAL015755

MELIIPSNGRKLHIAMFPWLAFGHLIPFLELAKLIAQKGHQISFISTPQNVHRLPKLPPNLTPLINFVQI

PLPAVENLPDGAETIDVPYDKVKYLKIAYDGLQEPITKFLHYSSPDWII FDFASYWVGPVASELEVSSA  
FFSIFTAAFMGFCGPAEILKGTVEGRTPEDFIVKPNWVPFESRVAFRLFEILRVFDGVTGDEDNVSDGL  
RMGCTIEGCDLIIIRSCYEFESDWLRVIEEIHRRKPLIPVGQLPTTVYDGGVDKDGAWREIKDWFDQKEK  
GSVVYVAFGSEAKPSQTELTEIALGLEVSGLPFFWVLRLKQRGSADIELTQLPEGFEGRTRGRGIVCTTWA  
PQLKILNHVSVGGFLTHSGWSSVVEAISLEKALILLTFLADQGPNNARLLEKKMGYSVPRDERDGSFSRD  
SVADALRLVMASEEGKIYRDVKVEMKWAFGDRDLQDRYVHNLLGYLQTHNRKKGR

>GWHPAAAL016884

MAASTFHIAIMPWFALGHLTAFLHLSNKLAKKGHKISFLIPTKTQPKLNPFNLYPNLITFIPITIPHVDG  
LPPGAETTSIPYLSGTHLMTAMDQTQAHIELLLRDLKVDIVIFDFAYWIPAVAKWLGKSIHYCTISPA  
TVAYTMVPARNLKGKVTETDLMQPPEGYPVSSIKLHAHEAPAFVARRSMRFGGDKQFYERQFLSFSQCD  
ALGFRACREIEGQFCDYIESQFRKSVLLSGPVIPEPPTSPLEEKWVKWLGKFEAGTVVYCTFGSECTLKK  
DQFQELVLGLELAGKPFLAALKPPAGVESTAALPENFKERVQGRGIVHGGWVQQQLILEHPSVGCFTITH  
CGSGSVSEALVNKCQMVLLPHVGDQIINARMMSRDLKVGVEVEKGEEDGVFTRESVCRAVRAAMEEGSEV  
GKEIRANHAKLREFLLHKDLESSYIENFLMKLQELLQ

>GWHPAAAL016885

MAASSFHIAIMPWFALGHLTPFLHLSNKLAKKGHRISFLIPTKTQHKLNPFNLHPDLITFIPITVPHVDG  
LPPGAETTSITPPQSLTHLMTAMDQTQHHEHLRLDKPDVVFDFTYWIPVAKRLGKSIHYCIISPA  
TIGYTMVPTNLRKNEVMEIDMRPPEGYPASSIELHAH  
EARAFVARRRRVAKSRANFVTTLKANSEXTSPLEEKWVKWLGKFEAGTVVYCAFGSECTLKKDQFQELVL  
GLELAGKPFLAALKPPAGVESTAALPENFKERVQGRGVVHGGWVQQQLILEHPSVGCFTITHCGSGSLSE  
ALVNKCQLVLLPHVGDQIINARLMSRDLKVGVEVEKGEED

GVFTKESVCRAVRAAMEEGSEVGKEIRANHAKLREFLLHKDLESSYIDNFLMKLQELPQ

>GWHPAAAL017403

MEREIDEMGSQKPHVLVVPFPAQGHFSPALQLSKRLASKGIRVTFVTTISSAESSGSIRMEHISDGYEEG  
EKPESIEAFTDRIKTVFSQNLGDLIEKQKRVGYPVKLLIYDSVIPWALEIAHSLGVYGAPFFTQTCAVCA  
IYYHAQKGNLEVPLEGTKFSLSPLPLERNDLPSFLSDMNSYQFFLKMVLAQFSNFQNAWILFNTFDKL  
EDEIVKWMASQWPRTVGTIPSMYLDKRLKEDKEYGLSLFTPNIESSMKWLDKEPGSVVYISFGSLAN  
LDEGQMKELSWGVLKSNYYYLVVVRDSEESKLPNNFMAETSEKGLVSWCPQLEVLAHQVAGCFVTHCGW  
NSMLEALCLGVPVAMPQWTDQTTNAKFVADVWRAGVRVEANDEGVVTREEIEKRIREVMEGETREELRK  
NASNWNLAAREAVDEEAVIFPANPSQKNNPMTQFSKCLATTGHR LAVTLVNTTATKFSYLSQPPSSISIE  
RMYLMMIN

>GWHPAAAL017405

MEITDRETGSSQNRVLVIPLPVQGHINPMLQFSKRLAAKDRHCRLGITLVTTTATKFFALSQPPNTISIE  
SLPDDSDDDQLVDTVALIRRFVKTVTEGLPRLVERLKNSGSPVRVVYDSFIPWVLDIAHQGLKGACFF  
TQTCAVSAVYYHVHGTLTPVSEEEQDHRSSVTLPGMPLMEINDLPSFVYVVYDQYPAALRFLLAQFSNA  
GKADWILFNTFDKLEHEVIENWAAREWPRMKSIGPTIPSAYLEEDKTLQNDKDYGLNLLDPNIEACMNW  
LDAKETASVAYVSFSSVADLKKEQMEELAWGLIGSGTHFLWVVRASEESKLPNFTDQALENGLIVNWCP  
QLRVLAHRAVGCFVTHCGWNSTLEALSLGVPLVAMPQWSDQTTNAKYVSDVWVKVGRARRVEKGEVVG  
EEIERCVKEVMEGESGDEVRRNAVRWKELAREAVAAGGSSDNNIQEFVSQVLKL

>GWHPAAAL017961

METRGPKEVVLVPYPAQGHMSPMLQLGTLHSLGFSITVAYASLNSPDSTHPEFDLPISEDLSDRDT  
SSGAVFSLITSLNADCAEPLRECLVRVTEDRGAVACVVYDSLIFYPEEVAHRMKIPSMVLQTCSAAYVLA  
CRLFPKLKEEGLPAESEDPSMEDLVPKLHPLRFKDLPI TKFDTTALQILMDLNDVGTSSAVIWNTTDYL  
EHPSLCRLRQHYQVPFPLGPLQAMAPTSSTSFLKEENGCLNWLENQAPKSVIYVSFGSNATMEPKELSE

VACGLANSDQPFLWVVRPGSVKGSKWVEHLPEGFIEAVGERGCIVKWAPQKKVLAHGAVGGFWSHCGWNS  
SLEGLSEGLPMICRPCFGDQRANARYLAHVVRVGLELELELERGAIERAVRRLMTGKEGEELKRRAMD  
MKQNIIEESVQKDGSSYNLSIELADFISDFHKTRQCV

>GWHPAAAL018171

MGKQLHVVFPPFMAHGHIPTLDMAKLFSSRGVKTIIITPLNAPVFSKSIQRSNQLGLDISLKIFDFPA  
VAAGLPEGCESADQITSEDMLPKFFVATALLREPLERLLSDHRPDCLIAGMFFPWTTESAAKFGIPRLVF  
HGTSFFALCAGESLRTHKPFQVTSDEPFVLPPELHEIKLTRTEVSPFELHDTETAISGVLKQVSESEK  
TCYGI IANTFYALEPDYADHYRNAMGRTAWHVGPLSLCNRGIEDKAERGKSSIDEHECLQWLDSKKPKS  
VLYVCFGSMKAFADSQLYEIAAGLESSGQQFIWVVRKSKDEEEQKEETWLPHGFEERTQGKGLIVRGWAP  
QMLILDHEAIGGFVTHCGWNSTLEGACAGLPMVTPAFAEQFYNEKLVTDVLKIGVSVGAKWKTPREG  
VKREAIEKAVRSVMEGEKAEEMRRRAALKEAAMEAVEEGSSYSDLTSLIEELTSSQKINGT

>GWHPAAAL018716

MEMEMEKREYRAHVLAIPFPAPGHVNPLLQFCKRLEFKGLKASLAITKFQSKSMQSRLGSIQIHTISDGY  
DEIGHNAESVGWISTFKEVGSKSVANLIQKFRSLGHPIDCIVYDSFLPWVLDVAKENGVAGASFMTHK  
CAVNHINYHVYHKKIPYFSSPTYSIPGLPSLDLEYMPGFMHVHPDYDLVLSQFSTVDRADYVFNFTFY  
KLEAEVLDEMSTLPVKPIGPTVPSFYLDNRVEDDKNYGLNLQQLDSSVCLNWLSSKPARSVVVSFGSV  
ATASPAANEMEEIAWGLKNSNCYFLWVWNANEENLPQNFKEEMSEKGLIVAWSPQLEVLSSHVSGCFLT  
HCGWNSTIEAICLGVPMAVPKWADQTTNSKFIQDVWKVGKVMPSENGIARREEIERCINV

>GWHPAAAL019177

MDHHRRRHHFLLISLPAQGHFNPTLQLAKVLARAGVTVTFATTVYGLNQLKVNSFTVDGIAYASFSDGHD  
EDRSKASSDFAGYLEDQRRVGSQNLIKLLENLANDGRPVTFIVYTVLLPWVAQVAREMHVPSAFFAIQCA  
ATLAVYHRFFNSSDGLLGGENEINESLSVELPGLPPLSSGEIPSFLMPADQYHSSVSPSFREHILTLEED  
PNPTVLINTFDAL EEDSIRAVRNMKIIAVGPLVPSAFSDGIDGSDKSFGCDLFRNSDDHHLRWLDSKSES  
SVIYVSFGSLAILGKPQKEEILNGLIDTERPFLWVIRDTAGEEEEEMAVPENGLVVPWCTQVEVLAHSSIG  
CFVTHCGWNSTIESLVAGVPVAMPQFSDQLTNAKLVEEVWNGVVRARKSEEKGVVEREEIRRCVEVVVG  
GGERGEEIRGSARKWRGLAMAAVREGGSSSKNLRFDLDSL

>GWHPAAAL019178

MDHHRRRRLHHFLLISLPAQGHINPTLQFAKVLARAGVTVTFATTVYGLSQLKANSSTVDGIAYTSFSDG  
YDEGGAKANIIFPDYMEDLKRLGSQNLIKLLKNLAGEGRPVTFLVYTVLCPWVAHVAREMHVPSAFFAIQ  
CAATLAVYHRFFNSSDGLLGGENEINESLSVDLPGLPPLSSGEIPSFLMPANQYHSSISPSIREHILTLE  
EDPNPTVLINTFDAL EEDSIRAVRNMKIIAIGPLVPSAFSDGIDSSDKSFGCDLFRNSGDHYLRWLDSKS  
ESSVIYVSFGSLAVLGKPQKQEILNGLIDTGRPFLWVIRDTAGEEEEEEEETAVPENGLVVPWCTQVEVLA  
HSSIGCFVTHCGWNSTMESLVAGVPVAMPQFSDQLTNAKLVEEVWNGVVRARKSEEKGVVEREEIRRCV  
EVVVGGERGEEIRGSARKWRGLAMAAVREGGSSSKNLREFLDSL

>GWHPAAAL020336

MFTSNRVELVIPSPGMGHLVSAVEMAKLLVDRDQRLSITILIMKVPSKTKANYSPSLSLSTAAASRIRF  
VDLPESESTPQFSPQSFISGFIPSQKTRVRDAVAKIAAAPGAHRLAGFFIDMFACTSMTDVADEFGVPTYV  
FFTSGAGLLGLMFHLQTMRDDYNHDITELMDSDTDLIVPSWIKPVPLKFLPSVFVNKEEGSHMFLDLTRR  
IMKTGKIVINTFFELESQAINSLNTLPVYPVGPILNVAGDNNSASAGAIMKWLDSPSSVFLCFGSMG  
CFDQVQKEIACALEHSGHRFLWSLRPPSNSETSELPEEYTNLEEVLPGEFLERTTKIGKIVGWAPQTAI  
LSHRAVGGFVSHCGWNSTLESVWYGVPPLATWPLFAEQQVNAFMMVEELEMAVEIKMDYHKS FYLKNGIVL  
KSEEIEKGIRRLMESGDIEIRQKVEQMRDKSRVAVKEDGSSFRSIERLIEDVINGAKMK

>GWHPAAAL020411

MVIPDFLIVEDNNSSEALSWVDSCTGDGYGGQMHHESSESNEWWSQSLPSKTLKGIHGEEDGVDKHESK

QSNNTILIKSFKEIEGKYDYHSLAKKKFVPVGPVQEPVCEEGFSKINELNKKDYGSTVLVSFGSEY  
FLKKEDNIEIAHGLELSNVNFIWVLRFPKGEKLVAQETFPLGFFYRVGDRGMVVEGWAPQVRILGHPSTG  
GFASHCGWGSVIESMSFGIPIIAMPMLDQITINARVVEEVGIGAEATMYISGKLKRENCGGDQGGGGGDR  
RGRREEKGKRDEG

>GWHPAAAL021381

MTIPHVLAIPYPAQGHVMPFMELSQCLVQHGVVRTFVNTDFNHKRVTKSMSEKESLTGMMHLVSI  
PDGLE PWEDRNDVGKLFESIFQVMPSKLEQLIEKINASEGKKISCVISDQCLGWALEVAEKMGIKRVTFWPASTA  
TMALTMNIPKLIDDGVINENGTSFSSWNRYEITHLYHFFFILKFHTARTPISKQIIQLLPTMPAMNTA  
NFYWACFGDLSTEKSIQMMVKNNKFLKLADRVICNSIHELEPAAFTLCPEVFPIGPLPLINKVGRSGAN  
FWPEDPTCLKWLDQPPQSVIYLAFGSFTIFDQTQFRELALGLELTNRPFLLWVVRPDITDQTKDPYPEGF  
IQRVSDRAQIVGWAPQQSILGHPSVACFMSHCGWNSTIEGVSNVGPFLCWPFYFADQFVNQYICDVWKVG  
LGFARDESGIIVQDEIRNKVEHLLGDESFRARATVLKEKAMETVKEGGSSHRNFSDLIGWMKEIKHD

>GWHPAAAL021402

MSDVAGRPPHIALFPGAGMGHLPFLRLAAMLASHNCKVTLIAVHPTVSAEASSQISAFFAANHHINRLD  
FHILPHNPPDSEVNDPFFVQFEAISRSVHLLGPLLSAASPPISAVFSDFPVAASMAQITDDLTIPNYIVS  
TTSARFFSLIAYFPLLNLQNHNSQIEIPGISPLPFSTLPPPLFSPNNLFTTGLATNSKYLPAKAGILVN  
SFHGFEPETIEAFNNGKIENLPPLLPIGPLLPHEHIPQCHEISWLDKQAEESVYVVSFGSRTAMAKEQ  
VRELGDGLERSGCPFLWVLKTKILDKDESEEEFSLSNSFLERTRRGVVLKEWVNQERILSHPAIGGFV  
SHCGWNSVMEAAKEGVPILAWPIGEKIREVMEDEKLRAKARKVGEEARKAVGMVGGSSEMVLQGILQSI  
A ETCH

>GWHPAAAL021780

MASKPLVHVFLVSFPGQGHVNPLRLSNLLASGGFFVTFSTTVSFGKMQSVNPVAVTGEPTVGDGFIRF  
EFFDEELALDDPRRRDNLFFYHLELAGKENLRLVENQSSSEDGRTPVSCLINNPLFPWADVADSLGIP  
CAILWVESCASLSAYYHYHGLVPFPDGEQPELDVEIPFLPLLKHHEIPSYLHPNDPCTFLKKLVLGQIK  
RLPKIFCVLIDTFEELEPQIIIRHVSDLIPIRSVGPLLRYRKSSSWITGDRLKTDDCIEWLDSKPPSSVLV  
MSFGSVAQVKQEIDEIAHGLLSSCVSFLWVMTPPMAGSPDKPRILPDGFSEKMGDRGKVVEWSPQERVL  
AHPVSACLVTCHGWNTTVEVLSNGKPVLAFPQWGDQVNNAKFLVDVFGVGIRVYRGEDRGSIVSRDEFEK  
CVREAMSGPKAVDIKENAMRWKVAEEAFAEGGSSRRNMLDFMEEIKRRSVD

>GWHPAAAL021819

MVPISTEPIRKCHVAVPYPRGHVNPMNICKLIASKFDPDRLVITFVVTEEWLGLIGSEIKPANVRFA  
AIPNVVPSERVRAADMVGFVTAVMTKMEQPFEEVLDRLMQSPASV I IADTFLRWAVEVGNRRSIPVASLWT  
MPAMVFSVFYNFELVVENGQFPIELCERGEERVDYLPGIPSIRLSDLPTIIHRRDQNLRLCLTAFANVS  
RARYLLFTTCSLEPQVIAALKTQFPPLYCLGPTIPYFNLQQPPPITPNHHDYLVKWDLSKPPNSVLVVS  
LGSFLSVSSSQMDEIEAGLGGSGVNYLWVNRGHAGVGGGGRMVVRWCDQLRVLCHPSVGGFWTHCGWNS  
TMEGIYAGKPMLTLPILMDQVPNSKCVVEDWKIGWEVKREEGNLSREKIVEVRRFMDEGSEEREEMMR  
RAEELRRLCRTALVRGGSSHENLQAFVDGIAKF

>GWHPAAAL022080

MTFLCSSFLVAYVWSPETPGSQKPHVLVVPFLAQGHFSPALQLSKRLASKGLRVTFVTTISCPKSNGSI  
RMEQISDGYEQREKPESIEAFAEGIKTAISQGLHDLMEKQKQVGYPVKLVVYDSGMPWALEMVHKS  
GVYGVLFFTQPCVVCALYYHMQQGTLEVPFEGTKVTLPSLPPLEKNDLSSSFISNLPHEFLVKGLLDQFSNIHR  
ANWILFNTFDKLEKEVVKWMASQWPVRTVGPTIPPMYLDKQLKRDKEYGLSLFTPNTASMKWLD  
TKEQG LVVYVSFGSMAILDETQMEELSWGLVQSNNYFLWVIRASKESKLSKFMAKTLEKGLMVNWC  
PQLEVLAH QAVGCFVAHCGWNSTPEALCLGVPMVAMPQWVDQTTNAKFVADVWGGGRSGRGGQ

>GWHPAAAL022859

MEMEMEKREYRAHVLAIPFPAPGHVNPLLQFCKRLEFKGLKASLAITKFQSKSMQSRLGSIQIHTISDGY  
DEIGRHNAESVGVWISTFKEVGSKSVANLIQKFRSLGHPIDCIVYDSFLPWVLDVAKENG VAGASFMTHK  
CAVNHINHYHVYHKKIPYPFSSPTYSIPGLPSLDLEYMPGFMHVHPDYDLVLSQFSTVDRADYVFNFTY  
KLEAEVLDEMSKTLVPVKPIGPTVPSFYLDNRVEDDKNYGLNLQQLDSSVCLNLWSSKPARSVVYVSFGSV  
ATASPAANEMEEIAWGLKNSNCYFLWVVNANEENLPQNFKEEMSEKGLIVAWSPQLEVLSHHSVGCFLT  
HCGWNSTIEAICLGVPMAVPKWADQTTNSKFIQDVWKVGVKMVMPSENGIARREEIERCINV

>GWHPAAAL023009

MIPTLDMAKLFSSRGVKTITIITPLNAPVFSKSIQRSNQLGLEISLKIFDFPAVAAGLPEGCESADQITS  
EDMIPKFFVATALLREPLEQLLSDHRPDCLVADMFFPWTTESAAKFGIPRLLFHGISFFALCAGESLRTH  
KPFRQVTSDEPFFVLPELPHEIKLTRTEVAPFDLYDTQTAISGVLKQVRESEKTCYGIANTFYALEPDY  
ADHYRNAMGRATAWHVGPLSLCNRGIEDKAERGKKASIDGHECLQWLDSKKPKSVLYVCFGSMKAFADSQ  
L YEIAAGLESSGQQFIWVVRKSKDEEEQKEETWLPHGFEERTQGGKGLIVRGWAPQMLILDHEAIGGFVTHC  
GWNSTLEGVCAGLPMVTWPAFAEQFYNEKLVTDVLKIGVSVGAKENRGPREGVKREAI EKAVRSVMEGE  
EVEEMRRRAAALKEAAMEAVEEGSSYSALTS LIEELSSRQKINGK

>GWHPAAAL023788

MERKTSILMFPWIA YGHISPFLELAKKLSQRDFFIYLCSTPANLASVKPKIDEKYSLLIKLVEFHLPTLP  
DLPPCFHTSNGLPPHLMHTLMTAVDMSNPSFSDILETLKPDLLIYDFVPHWAPATAAAHNIPAVEFITSS  
ATVYFRHYEKAHQDEMIESDRYQYNKNLSVKSPQQSNNIILIKSFKEIEGKYDYLSLLAKKKIVPVG  
PV VQKPFCEEGFSEIIEWLNQKDYGSTVFVSFGSECYLKKEDIEIAHGLELSNVNFIWVLRFPKGEKLGAQ  
ETLPLGFLDRVRERGMVVEGWAPQARIL AHPSTGGFASHCGWGSVIESMSFGVPIIAMPQYDQPINATV  
VEEVGLGVEATRDITGKLQREKIAAVLRKVMVEREGE GVRKKAREMRDDIRIKGDEEIDNVVLELQQLCK  
IK

>GWHPAAAL023789

MERKTSILMFPWIA YGHISPFLELAKKLSQRDFFIYLCSTPANLASVKPKIDEKYSLLIKLVEFHLPTLP  
DLPPCFHTSNGLPPHLMHTLMTAVDMSNPSFSDILETLKPDLLIYDFVPHWAPATAAAHNIPAVEFITSS  
ATDYFRHYENAHQDEMIESDRYQYNKNVSVKSPQQSNNIILIKSFKEIEGKYDYLSLLAKKKIVPVG  
PV VQKPFCEEGFSEIIEWLNQKDYGSTVFVSFGSECYLKKEDIEIAHGLELSNVNFIWVLRFPKGEKLGAQ  
ETLPLGFLDRVRERGMVVEGWAPQARIL AHPSTGGFASHCGWGSVIESMSFGVPIIAMPQYDQPINATV  
VEEVGLGVEATRDITGKLQREKIAAVLRKVMVEREGE GVRKKAREMRDDIRIKGDEEIDNVVLELQQLCK  
IK

>GWHPAAAL023791

MESKTSILMFPWIAHGHISPFLELAKKLSKRNFLIYLCSTPANLVSVKPKIDEKFSLSIKLVELHLPALP  
DLPPCFHTTNGLPPHLMFTLKDAFDMSNQNFSDILETLKPDLLIYDFLQWPAPATAAAHNIPAVEFITSS  
ATMTSLMLHVFNDPDKDFPFSDTVYFRDNERAHLDRMIESARNQHKKKNPAIECLKQSNNIVLIKSFKEI  
EGKYCDYLSLLAKKKLVPGPVVQEPVCEEQFSDIEWLNKKDHGSTVFVSFGSEYFLKKEDITEIAHGL  
ELSNVNFIWVLRFPKGEKLAAQETLPLGFLDRVGERGMVVEGWAPQARILGHPSTGGFASHCGWGSVIES  
MSFGIPIIAMPMHLDQPINARVVEEVGIGVEATRDITGKLKREKIAAVIREVVVETEGE GVRKKARKMRD  
DIRIKGEEEIDNVVLELLQLCKKK

>GWHPAAAL023813

MDTTRERSSERMILMFPWIAHGHISPYLELAKRLNQRNIKTYLCSTPINLSVKNKIDNNSDLLQLVE  
LHLPSTPELPPQYHTANGLPRHLMIPKATIEASGPPKFSAMLETLPDLVLYDFNLPWGATVAASHNIP  
AVQFIIVGAVMISFALHTLEKPATEKYPPAITLSSESQSHMRKLLDESVLGISDKDRFREGVDRSQDII  
LIKSTIEIESNYLNYLSELAGNKKIVPGQLVQQADDRRRDFNEDQIIKWLDKKEKANSVVFVSFGSEC  
FLSKEEIQEMGRGLELSRVDFIWVVRYPVGDKTRVLEDELPEGFRERVLGGERGMVVEGWAPQSKILGHP

NLGGFLSHCGWSSVMESMKMGVPIIGMPMGVDQPLNCKVVEDAGVGVEVKRSDGKIKGEVIGEAIIRRV  
AEMGGESVRKKAKELGEKLRETGEREVEAAVQEILKFSSNKQ

>GWHPAAAL023819

MGMAAKNDDESGDNQTVAEYGEKRRWGGCSLPVRRRRWRRGIGDERESGNSGEFSEWLDGKEELSTV  
SFGSEYFLSKEEIVEIAHGLELSEVNFIVVIRFPMGEEKKTRVGEALPLGFKERVRRERGMVVEGWAPQAK  
ILGHKSVAGFVSHYGWNSVLEGMKFGVPLVAMPMLDQPVNARLAVEVGVAVEALRDEDDGGVQRKEVARV  
IREVVVGENC GGVRERARELSENMRRLRGDVEVHGLVEVLAQLHQKNAQSC

>GWHPAAAL024115

MAEDRNEGNIVMFPFMAQGHILPFLALARQIEQRHGGYTITIVNTPLNICKLKCWLPPETTIRLVEIPFS  
AADHGLPPDSENTDMLSREQALYLFEASESLEKPFENLISEIATGDGRQPICIVSDMFLGWTNVNAKKG  
IFHSVFIAGDGYMGLYFSLSLNENLWTVAADEFLPVDPGAARIHWSRIPIDLKYEEAAESWFRFRKR  
QFSYCLCSDSILLNSIKELGQKGVEYFRRTGGKPVWTIGPVSNLTVKNKIFTKISTNPISDWLDLHPPG  
SVLYISFGSQCSLLASQMKELAMGLEESRCPIVWVRPPVEFDLTGDFRSEWLPVGFEERMRLNQGLI  
HGWGPQLEILSHRSTGGFLSHCGWNSVVEGLCGGVVILGWPMAGEQFFNSEMLAEVGVCEVREKNNGC  
GIVGHQRIAEVIEAMGKSEKGEEMRRKAREMSEKMEAAVKVEEGFRGSSVKVMDEFISTAISSKKR

>GWHPAAAL024577

MAANHQNNGSLTFTGPVSIVAVPFAHGHNLQLLHLSCTFFSSAGLPVHFASTATHNRQARLRATSLNFEK  
IHFHDLPHPHFQSPPNPTAAIKFPAHLQPSFEAALHLRQPLAALLREISTVSRRVIVIHDPMLSSVAQE  
AASILNPETYVFSCLSVLFQLAHLCENKFQAEIPANLPTMDGCLTPEFMESASQFQLLGTEEGKFRAGY  
LYNSCKLIEGRYIDLSSYDQYQDKKIWAIGPILPKSVTKTSNWSHKSIEWLDKQEPSVIVVSFGTMT  
SISDEQIRELAVGLEQSKQRFIWWLREADRADIFSCEEQRKVEVEGFEERVKGIGMVVRDWPQPEILG  
HRSTGGFMTHCGWNSLESVTMGVPVAAWPMHSDQPRNAVLLTEVLKVGVPVREWTGKGEIVGSSEIEEA  
VRLMASEEGEIRKRAEELGGEIRRSTAEGGVCVELDSFVAHITRN

>GWHPAAAL024578

MEAFGFSGRDHSSRHDVVMVFPFAQGHNLQLLNSRLTSHGIPVYFAGTAIHNQARLRAHGWDP  
TPNMHFHDFTPSFQSPPNPNDASTSFPTHLLPSFNASLDLRQPFADLLRDFSPEARRVVV  
VVDVVGSTPNAESYTFHSVSAFTIFWYLWEAKGRFPFVEGEILKDIPPTDGCFASEFPEFIQNHAYMKF  
NSGDLYNTSKVIEETYIDYLCKEPIKGNKKQWPIGPFNPVEPVETKKPNRHFCLNWLKQAINSVIFVS  
FGTSTSLKDDQIEELANGLDQSEHRFVWVRDADRGDVFDMPPRRVELPVGFEERVREKGIIVRDWAPQP  
EILRHPSTGGFMTHCGWNSCMESITMGVPIAAWPMHSDQPRNAVLIKLLKIGIIVKDWGRRGERVVAET  
VEKAVKSEEGDKIRHGGGLSDAVRESVAEGGSTRELDVSFVAHITRS

>GWHPAAAL025080

MEDIAVLVPSPGIGHLISMVELGKLILNHRSFSINILITTPPYNTGRTAPYIDRVSAANPSIHFHHLPS  
VPLSVSTTSLNHETLAFQLLLLNPNPHVHQALTSISQTSTPCAFIIDFFCASALSAKDLNIPYFFYTSG  
AGALASFLYLPTIHRSTAGNLKDLKTSLHIPGLPPFRASDMMKPVLDKAYEFFLDVSLNFPKASGII  
INTFEYLEPRSIKAISSGLCVSNSDGPPPIYICIGPLIAAGDRSDGKTLNRHECLRWLDSQPSKSVVFLC  
FGSLGLFPMQDLREIAIGLERSGCRFLWVVRSPPPPENQTERFLAPADPDGALLPDGFMDRTEGRGFV  
VKSAPQVEVLSHDSVGGFVTHCGWNSVLEAVCAGVPMVAWPLYAEQKFNRVVLVEEMKLALPMEESDG  
FVCAGEVEKRVTELMDSVDGRLVRKHVLAARDAAKAAIGDGGSSRLDLGQLIELWTQN

>GWHPAAAL025081

MEDIAVLVPSPAIGHLISMVELGKLILNHQPTFSIIILITPPYNAGNTAPYINQVSATTPSIHFHHLPS  
VPLSLSTASRNHETLAFQLLLLNPNPHVHQALTSISQTSTPRAFIIMDFFCTPALSVARDLNIPYFFYTSG  
AGGLASFLYFPTIHRSTAGNLKDLKTFHIPGLPPFRATDMPKPVLDKAYEFFLDVSLNFPKASGII  
VNTFEYLEPRSIKAISSGLCVSDSDGPTPIYICIGPLIASGDRSDGEIVNKECLRWLDLQPSKSVVFLC

FGSLGLFSLEQLREIAVGLERSGCRFLWVVRSPPLPLENQTERFLAPADPDLGALLPDGFMDRTEGRGLV  
VKSWAPQMEVLNHDSVGGFVTHCGWNSVLEAMCAGVPMVAWPLYAEQRFNRVVLVEELKLALPMEESD  
FVCASEVEKRVTELMDSVEGRSVRTHVLAARDAAKAAIGDGGSSRLNLGRLVDSWTRN

>GWHPAAAL025228

MSVHVLIFPYPAQGHLLPLLDLTHQLALHGLTITILVTPKNRPTLDPLLSTHPSIGTLVLPFPHHPAIPS  
GVENVKDLGNSGNVLVINALSKLRDPIIQWFKAHPNPPVAIVSDFFLGWTNDLAGQLGIPRVAFYSSGAF  
LTSILFHFYRELRSAAVLTAVKFTDLPRSPSFTEAHLPTIVRHYRESNPEWELLKEGVIANSSWSGSIL  
NTFDDLEGEFLEYLKKKMGHNRVYGVGPLNLGRVNTDPDADPSNTVLGWLDCPDGSGVIYVCFGSQKFLK  
KAQIEALALGLERSKARFIWVVKPITAQQEADGYGSILDGFEERVSGRGMVIKGWAPQVKILSHRVVYGF  
LSHCGWNSVLEAIAAGVMILGWPMADQFVNARLLVDYMGAAIRVCEGADSVPSDELARTIAESVDGNK  
QEKGRARELRDKAWEAVGPCGSSTKDLVGFVKDLAQLDENG

>GWHPAAAL025545

MIPTLDMAKLFSSRGVKTIIITPLNAPVFSKSIQRSNQLGLEISLKIFDFPAVAAGLPEGCEADQITS  
EDMIPKFFVATALLREPLEQLLSDHRPDCLVADMFPPWTTESAAKFGIPRLLFHGISFFALCAGESLRTH  
KPFRQVTSDEPFVLPPELHEIKLTRTEVAPFDLYDTQTAISGVLKQVRESEKTCYGI IANTFYALEPDY  
ADHYRNAMGRATAWHVGPLSLCNRGIEDKAERGKKASIDGHECLQWLDSKKPKSVLYVCFGSMAKFADSQ  
YEIAAGLESSGQFIIWVRKSKDEEEQKEETWLPHGFEERTQGKGLIVRGWAPQMLILDHEAIGGFVTHC  
GWNSTLEGVCAGLPMVTWPAFAEQFYNEKLVTDLKIGVSVGVKEWKAGPREGVKREAIKAVRSVMEGE  
EAEEMRRRAALKEAAMEAVEEGSSYSDLTSLIEELSSRQKINGK

>GWHPAAAL025754

MENQKKGNGGAHILAIPFPAPGHMNPLIQFCKRLVFKGGVKATVAITRYQAKSIQTRLDTIQIDTISDGY  
DEGGFYVIDSIEDSIEKFKVAGSQTALAEIEKYEKLGNPIDCIIYDAFLPWVLDVAKKFGKIVAAFFTQP  
CAVNCINYHVYHKLLPYPFSSPPI SVSGLPPLNLEDMPGFIYVDPGHYVLVQSQFSKADEADYRFVNTFY  
DLEAEAVDAMKKIHSLRTIGPTVPSFYLDKRVPNDSNYGLHSSNLIMQQKKSTSTPDADPLACLDWLSTK  
PPRSVVYVSFGSVAVASPVSEEMKEIAWGLRNSNCFLLWVVKGNEEPNLPENFKEETADKGMIPWSPQL  
EVLAEATGCFITHCGWNSTIESLCLGVPMVAMPKWADQTTNAKYIEDVWKAGVRAKVGENGVASREEIE  
RCIRAVLEGESGKYKSNAMKWDLATHAVSEGGTSDKNIAEFLSELKAR

>GWHPAAAL025999

MEKTHVAIILPTPGMGLIPLVEFAKRLIDGYNFSFTLILPTDGPLSKAHKEFVDSLPAIDHVLPPVS  
HDDMTVENRIALTISRSLPAFRDAFKTLVDEKKVAALVIDLFGTDGFDVAIEFGVSPFIFFPSTAMALSL  
FLHLSKLDAAETVGEYRDQPEPIRIPGCIPIQGKMDLPVQDRKNDAWKLLHHAGRYKLAEGIMVNSFRE  
VEPGPITALLKKEPGKPIIYPVGPLIKMSSNADDAESECLKWLNQPSGSLFVSFGSGGTLSVQLNEL  
AMGLEMSEQRFIWVVRSPNDGTSAAATYFNVNSQTDYPYSFLPEGFVGRTRGRGLLVPSWAPQAAILSHGST  
GGFLTHCGWNSTLESYNGVPLIAWPLYAEQRMNAVMLTEDLKVALRPKTGENGIVGRLEIANVVKGLME  
GEEGKGIRSRMRDLKDAAKAIGEDGASTKALSEVACIWKNKINYCFN

>GWHPAAAL026143

MDHHHFLILSLPGQSHLNPTIQLGKVLARAGVTVTFATTVYGLNQLKTKSTTVDGIAYTSFSDGHDE  
KARSNFAGYMDLKRVSQNLIKLLENLAGGRPVTFIVYTVLLPWVAQVAREMHLPSAFFAIQCAAALA  
VYHRRFFNSSDGLHGGENEINDSISVELPGLPQLSSGEIPSFLPADPQHSSINQPCREHILTLEEDPNPT  
VLINTFDALIEDSIRAVRNMKIIAVGPLVPSAFSDGIDASDKSFGCDLFRNSGDQYLPWLDKSDSSVIY  
VSFGSLVVLEKPKKEEILNGLIDTGRPFLLWVIRDTAGEEEETAVPENGLVVPWCTQVEVLAHSSIGCFVT  
HCGWNSTMESLVAGVPVAMPQFSDQLTNAKLVEEVWGNVGRAGKSEEKGVVEREEIRRCVEVVVGGGER  
GEEIRGSARKWRGLAMAAVREGGSSSKNLREFLDSL

>GWHPAAAL026144



MDRRRRHRHFL LISLPAQSHLNPTIQLGKVLARAGVTVTFATTVYGLNQLKTKSTTVDGIAYTSFSDGHDE  
DGHKARSNFAGYMDDLKRVGSQNL IKLLENLAGEGRPVTFIVYTVLLPWVAQVAREMHLP SAFFAIQCAT  
ALAVYHRFFNSSDGLLGGENEINESLSVELPGLPPLSSGEIPSFLMPANQYHSSVSPSFREHILTLEEDP  
NPTVLINTFDAL EEDSIRAVRNMKIIAVGPLVPSAFSDGIDASDKSFGCDLFRNSDDHHLRWLDSKSESS  
VIYVSFGSLAILGKPQKEEILNGLIDTGRPFLLWVIRDTAGEEEETAVPENGLVVPWCTQVEVLAHSSTGC  
FVTHCGWNSTMESLVAGVPVAMPQFADQLTSAKLVEEVWNGVVRARKSEEKGVVEREEIRRCVEVVVGE  
GVRGEDIRRNALKWRGLAMAAVREGGPSCKNLRDFLDSL G

>GWHPAAAL026243

MEKLTETRRYPKEVVLVPYQAQGHMSPMLQLGTLLHSLGFSITVAHARINSPDPLTHPDFDFRPISEDLS  
DRDTSFHGLLSLITTLNTGCKELLRECLVRLKEERGPVACVVYDSVMYFADEVNQMKIPSMVLQTCNA  
YVLPQQLLPQLKAEGYLPSESDPAGDHLVPKLYPLRFKDLPI LKFNTPTLQLLTTLSDIRTSSAVIWN  
TIDHLEHPSLCRLRQHYKVPIFPLGPLQKMAPSSSASFLKEDYDCLTWLEKQAPKSVIYVSFGSIAMVEPN  
ELSEVAWGLANSQGPFLWVVRPGLVEGSERIEHLPEGFKETVGERGCIVKWAPQKEVLAHEAVGGFWSHC  
GWNSSLESISEGVPMICRPCFGDQRVNARYLTHVVRVGLELENKLERGAIESAVRRLMIGKEGKEIRRKV  
LDMKQNIIEIVQKGGSSYNTLIELADFISDFHKTGQY

>GWHPAAAL026244

MENQKETRYPKEVVLVPFPVQGHMSPMLQLGTLLHSLGFSITVAHARINSPHPSTHPEFDFQPISEDLAD  
RDTSFNGLFSVIMTLNTDCGEPLRECLVRLTEDRGPVACVVYDSL MYFADEVANQMKIPSMVLQTCNAAY  
ILPCQLLPQLKAEGYLPSESDPSWEDLVPKLHPLRFKDLFPFKFDTPTLQVMTLCDVRTSSAIWNTT  
DHLEHPFLCRLRQHYKVPIFPLGPLQKMAPSSSSTSLKEEYDCLTWLEKQAPKSVIYVSFGSIATVEPNE  
LSEVAWGLVNSGLPFLWVVRPGLVNGSEWIEHLPESFKEFVGERGCIVKWAPQKEVLAHEAVGGFWSHCG  
WNSSLESISEGVPMICRPCFGDQRVNARYLTHVVRVGLELEDKLERGAIERVLRRLMTGKEGEEIRRRAM  
DMKQNIIEEVQKGGSSYNSLIELAGFISDFHTTKQCV
