# Supplementary material for: Genomic-Wide Identification and Characterization of the Uridine Diphosphate Glycosyltransferase Family in Eucommia ulmoides Oliver
Source: MDPI journal article supplement (doi:10.3390/plants10091934), 2021-09-17
Supplement: s1 [file s1]

## List of the nucleotide sequences of *Eu*UGT genes

>GWHPAAAL000151

ATGGTACCGATTAGTACGGAACCAATCCGTAAATGCCACGTGGTCGCCGTTCCCTACCCCGGCAGGGGCC  
ACGTTAACCCCATGATGAACATCTGCAAGCTGATAGCCTCCAAATTCGACCCCGACCGTCTCGTCATCAC  
GTTTCGTCGTCACCGAGGAATGGCTGGGTCTAATCGGCTCCGAGATCAAGCCGGCGAACGTCCGCTTCGCC  
GCCATTCCGAATGTCGTGCCGTCGGAGCGGGTTCGAGCCGCCGACATGGTTGGGTTTCGTCACGGCGGTTA  
TGAATAAAATGGAACAGCCGTTTGAGGAGGTCTGGATCGGATGCAATCTCCGGCGAGTGTGATAATAGC  
GGATACTTTCCCTGCGGTGGGCGGTGGAGGTGGGGAACCGGAGGAGTATTCCGGTGGCGTCGCTGTGGACG  
ATGCCTGCGATGGTATTTTCGGTATTTTACAATTTTGAGCTTGTGGTTGAGAATGGGCAATTTCCCATTG  
AATTGTGTGAAAGAGGAGAGGAGCGCGTGGATTACTTACCCGGAATTCCTCAATTCGTCTCTCCGACCT  
CCCAACGATCATTCACCGAAGAGATCAGAACCTCCTCCGCCTCTGCCTTACCGCTTTCGCCAATGTTTCC  
AGAGCACGGTACCTCTTATTACACACCTGCTCCGATCTCGAACCCCAAGTCATCGCCGCCTTGAAGACAC  
AATTTCCGTTCCCGTTGTACTGTCTCGGCCCCGACCATAACCCTATTTCAACCTCCAACAACCAACCCCAAT  
CACCCCAACCAACGACTACCTAAATGGCTAGACTCAAAACCACCAAATTCAGTTCTGTACGTGTCA  
CTGGGGAGTTTCTGTGCGTTTCGAGCTCCCAAATGGACGAAATCGAAGCCGGATTGGGCGGCAGCGGCG  
TGAATTACTTGTGGGTAAACCGTGGTCATGCTGGCGGCGTCGGTGGAGGAGGAAGGATGGTGGTGCGGTG  
GTGCGACCAGCTAAGGGTTTTGTGCCATCCGTGCGTGGGTGGATTCTGGACGCACTGCGGGTGAATTTCG  
ACGATGGAGGGGATTTACGCCGGAAGCCGATGCTGACGCTTCCGATACTGATGGATCAGGTGCCAAACA  
GCAAGTGCGTGGTGGAGGATTGGAAGATCGGATGGGAGGTGAAGAGAGAGGAGGTAATTTGGTGAGTAG  
AGAGAAGATTGTGGAGGTGGTGCGGAGGTTTATGGATGAGGGAAGTGAGGAGAGGAGGAGATGATGAGG  
AGGGCGGAAGAGCTACGTCGATTGTGCCGACGCGCTCGTCCGAGGAGGTTCTTCCCACGAGAATCTCC  
AAGCTTTTGTGATGGAATTGCCAAATTTTAA

>GWHPAAAL000153

ATGGCAGAAAGAGGAGAGGAACGCGTGGATTACCTCCCCGGAATTCCTCAATTCGTCTCGCCGACCTCC  
CGACGATCATCCACCAAAGTGATCAGAACCTCCTCCGCCTCTGCCTTACCGCTTTCGCCAATGTTTCCAG  
AGCACAGTACCTCTTATTACACACCTGCTCCGATCTCGAACCCCAAGTCATCGCCACCTTGAAGACACAA  
TTTCCGTTCCCGCTGTACTGTCTCGGCCCCGACCATAACCCTATTTCAACCTCCAACAACCAACCGCAAACCA  
CCCCCAACCAACGACTACCTAAATGGCTAGACTCAAAACCACCAAATTCAGTTCTGTACGTGTCACT  
AGGGAGTTTTCTGTGCGTTTCGACCTCCCAAATGGACGAAATCGAAGCCGGATTGGGCGGGAGCAGCGTG  
AATTACTTGTGGGTAAACCGCGCGATGCTGGCGGCGTCGGCGGAGGAGGAGGATGGTGGTGCGGTGGT  
GCGACCAGCTAAGGGTTTTGTGCCATCCGTGCGTGGGTGGGTTCTGGACGCACTGCGGGTGAATTTCGAC  
GATGGAGGGGATTTACGCCGGAAGCCGATGCTGACGCTTCCGATAGTTATGGATCAGGTGCCAACAGT  
AAGTGCGTGGTGGAGGATTGGAAGATCGGATGGGAGGTCAAGAGAGAGGAGGTAATTTGGTGAGGAGAG  
AGAAGATTGTGGAGGTGGTGAGGAGGTTTATGGATGAGGGAAGTGAGGAGAGGAGGAGTTGGTGAGGAG  
GGCGGAAGAGCTACGGCGGTTGTGCCGACGCGCTCGGCAGAGGAGGTTTCATCCCATGAGAATCTCCAA  
GCTTTTGTGATGGAATTGCCAAATTTTAA

>GWHPAAAL000493

ATGGAGCAGCGAGGTACAGAGCCCATGTCCTGGCAATTCCATTTCCGGCACCAGGCCATGTTAACCAC  
TTCTCCAATTCTGCAAGCGCTGGAATTCAAGGGCTTGAAGGCGACTCTCGCCATCACCAAATTCCTGTC  
CAAATCCATGCAATCCAGACTCGGGTCGATCAAGATCGACACGATCTCCGACGGGTACGATGAGATTGGA  
CGGCACAACGCTGAGAGCCTCGGCGTATGGATCTCGACCTTCAAGGAAGTAGGTTTGAAATCCGTGGCGG  
ATCTCATCCATAAGTTTCGGAGCTTGGGTCATCCGATCGATTGCATCGTCTACGATTTCGTTTCTCCCTTG

GGTTCTGGATGTCGCCAAGGAGAACGGAGTTGCCGGAGCTTCGTTTCATGACCCAGAAGTGTGCGGTGAAT  
CACATCAACTATCATGTCTACCATAAGAAGATCCCCTACCCCTTTTCTTCTCCGACGTACTCGATTCCGG  
GATTGCCGTCGCTCGATCTCGAGTACATGCCCGATTATGCTCGTCCACCCGATTACTACGAGCTGGT  
TCTCAGTCAATTCTCGACTGTGGATCGGGCTGATTACGTGTTTCGTCATACTTTCTACAAATTGGAGGCT  
GAGGTATTGGATGAAATGTCAAAGGTCCTTCCAGTGAAACCAATAGGACCAACAGTCCCATCTTTCTACT  
TGGACAACAGGGTTGAAGATGACAAAACTATGGGCTCAACCTCCACCAACTGGACTCGTCGGTTTGCCT  
CAATTGGCTCAGCTCTAAGCCTGCAAGGTCTGTGGTTTACGTGTCGTTTGGCAGCGTGGCCATATCCAGT  
CCAGCAGCCAACGAAATGGAGGAGATAGCGTGGGGTTGAAGAACAGCAATTGCTCCTTCCTGTGGGTGG  
TGAAGGCTAACGAAGAGCCAAATCTCCCCAGAATTTCAAGGAGGAGATGTCCGAAAAAGGATTGATCGT  
GGCGTGGAGTCCCAGATAGAGGTACTGTACACCATTTCAGTTGGGTGCTTCCTGACTCACTGTGGCTGG  
AATTCAACCATCGAAGCTATTTGTCTGGGCGTTCCAATGGTGGCTGTGCCAAATGCACGGATCAAACCA  
CCAACTCGAAGTCCATACAGGATGTTTGGAAAGTTGGGGTCAAAGTTAAGGCATCCGAAGATGGGATTGC  
TAGAAGAGAAGAGATTGAGCGGTGTATTAAGGTTGTAATGGAGGGGGAGAGCGGGGAGGAATTGAAGAAG  
AATGCGGCCAAATGGAGTGAGTTGGCTAAGGAGGCGGTGAGCGAGGGCGGAACCTCTGATGAAAAATCA  
ATGAATTTGTGTCTCAATTGACAACTCCTCATCAACCCAATCTTGA

>GWHPAAAL000531

ATGGAAAGAGATTTAGATGAAATGGGTAGCAAAAAACCTCACGTTCTAGTAATCCCATTTCCAGCACAAG  
GTCACCTTTAGTCTGCACTGCAACTCTCCAAGCGCTTAGCCTCAAAAGGGCTTAGGGTCACCTTCGTAC  
CTCCATGAGCAGCGCAAGTCCAGTAGTTCCATTAGGATGGAGCAAATTGGCGATGGCTACGAAGAAGGT  
GAAGAACCTGAGAGCAAAGAAGCCTTTACTGAGCATATCCAACTGTATTCTCGCAAAGCCTAGGTGATA  
TAATTGAGAAACAAAAACAAATCGGTTATCCTATTAAGTCTAGTTATTTATGATTCTGTTATGCCGTGGGC  
ACTAGAGATAGCACATAAGTTGGGCATTTATGGAGCTCCATTCTTCACTCAACCCTGCGCTGTATGTGCC  
ATCTATTACCATATGCAACAAGGGACTCTGGAAGTTTCTCTTGAAGGAACAAAAGTCTCCCTACCTTCAT  
TGCCGCCATTGGAGAAAAATGATCTGCCATCTTTCATCTCTAACATGTTCTCACACGAATTTCTCACGAA  
AACGATATTGGGCCAATTCTCCAATTTCCATGAAGCAGATTGGATTTTATTCAACACCTTCGACAAGCTG  
GAAGATGAGGTAGTGAAGTGATGGCAAGCCAGTGGCTATCAAAACAATGGGACCAACTATTCCATCTT  
TGTAAGTCTAGACAAGCGACTTAAGGAAGACAAAGAATATGGCCTCAGCCTCTTCACTCCAAACACCGAGGC  
TAGTATGAGGTGGCTGGACACGAAAGAACAAGGTTTCGGTGGTTTATGTCTCATTGGGAGCTTGGCCATC  
CTTGATGAACTCAAATGGAGGAATTATCATGGGGCCTTTTGCAGACCAACAATACTTCTGTGGGTGG  
TCAGAGCTTCCGAAGAGAGCAAGCTTCCCAACAATTCATGGCGAAGACCTCAGAGAAAGGGTTGGTGGT  
CGATTGGTGCCCGCAGCTTGGGTCTGGCTCACCAGGCGGTAGGATGTTTCGTGACTCACTGTGGTTGG  
AATTCGACGCTTGAAGCTTTGTGCCTTGGGGTGCCAATGGTTGCTATGCCCCAGTGGGTTGATCAAACGA  
CTAATGCGAAGTTCGTGGCTGATGTATGGAAAACAGGGGTTTCAGTGGAGGTCAATGATAAGGGGATTGT  
TACGAGAGAAGAGATTAAAAACGAATCGGAGAAGTCATGGTGGGAGAAACGAGGAAGAATAAGAAAT  
AATGCTAGCAGGTGGAACAACTTAACGAGAGAGGCAGTGGATGAAGGTGGGAGTTCTGATAAGAATATTG  
AGGAATTTATTTCTAACTAGTATGCTCCTAA

>GWHPAAAL000532

ATGGAAAGAGATTTAGATGAAATGGGTAGCAAAAATCCACATGTTCTAGTAGTCCCATTTCCAGCACAAG  
GTCACCTTTAGTCCAGCGCTGCAACTCTCCAAGCGCTTAGCCTCAAAAGGGCTTAGGGTCACCTTCGTAC  
CACCATTAGCAACGCCAAGTCTAGGGGTTCCATTAGGATGGAGCGAATTACCGATGACTACGAAGAAGGT  
GAAGAACCCGAGAGCATAGAAGCCTTTATCGAGCGTATGAAAGTCGTAATATCACAAGCCTAGGTGATA  
TAATTGAGAAACAAAAACATGCCGTTACCCTGTAACTAGTTGTTTATGATTCTATTATGCCATGGGC  
ACTAGAGATAGCACATAAGTTGGGCGTTTATGGAGCTCCATTCTTCACTAACCCTGCACTGTATGTGCT  
ATCTTTTACCATATGCAGCAAGGGACTGTGGAAGTTCTCTTGAAGGAACAAAAGTCTCCCTGCCTTCAT

TGCCGCCATTGGAGGAAAATGATCTGCCATCTTTCATCTCTAACTTGGTCGCACCTGAATTTATCAAGAA  
AATGTCATTGGGTCAATTCTCCAATTTCCATAAAGCAGATTGGATCTTATTAACACCTTTGACAAGTTG  
GAAGATGAGGTAGTGAAGTGGATGGCAAGCCAATGGCCTATCAGAACCATCGGACCAACTATTCCATCCA  
TGTA CT TAGACAAGCGACTTAAGGAAGACAAAGAATACGGCCTCAGCCTCTTCACTCCAAACACCAAGGC  
TAGCATGAAGTGGTTGGACACGAAGGAACAAGATTCGGTGGTTTATGTCTCATTGGGAGCCTGGCCACC  
CTTGATGAACTCAAATAGAAGAATTATCATGGGCCCTTGTGAATAGCAACAATACTTTTTGTGGGTGG  
TCAGAGCTTCCGAAGAGAGCAAGCTTCCCAGCGATTTTATGGCCAAGACCCTAGAGAAAGGGCTGGTGGT  
CAATTGGTGCCCCCAGCTTGAGGTCTTGGCTCACCAGGCGGTGGGATGTTTCGTGACTCACTGTGGTTGG  
AACTCGACGCTTGAAGCTTTGTGCCTTGGGGTGCCAGTGGTTGCTATGCCCCAGTGGGGTGATCAAACGA  
CTAATGCGAAGTTCGTGGCCGATGTGTGGAAGGTAGGGGTTTCAGTGGAGGCCAATGATAAGGGGATTGT  
TACGAGAGAAGAGATTGAGAAACAAATTGGAGTAGTCATGGCGGGAGAAACGAGGGAAGAAGTAAAAAG  
AATGCTAGTAGTTGAAAAACCTGGCAAGAGAGGCAGCAGATGAAGGCGGGAGTTCTGATAAGAATATTG  
AGAATTTGTTTATGAACTAGTATGCTCCTAA

>GWHPAAAL000534

ATGGCAAGAGATTTAGATGAAATGGGTAGCAAAAAACCTCATGTTCTTGTAGTCCCATTTCACGACAAG  
GTCACCTTTAGTCCAACACTGCGACTCTCCAAGCGCTTAGCCTCAAAGGACATAGGGTCACCTTCGTAC  
CACCATTAGCAGTGCCAAGTCCAGTGGTTCCATTAGGATGGAGCAAATTACCAATGACTACGAAGAAGAG  
ATAGCACATAAGTCGGGCGTTTATAGAGCTCTATTCTTCACTCAACCCTACGATGTATGTGTATCTTTT  
ACCATATGCAACAAGGGACTCTAGAAGTTCCTCTTGAAGAAATAAAAGTCTCTCTACCATCATTGCCGCT  
ATTGGAGGAAAATGATATGCCATCTTTCATCTCTAACTTGTCTCACACGAAATTATCAAGAAAAAGTA  
TTGGGCCAATTCTCCAATTTCCATAAAGCAGATTGGATCTTATTGAACACCTTTGACAAGCTAGAAGATG  
AGGTAGTGAAGTGGATGGCAAACAGTGGCCTATCAAAACCATCGGACTAACTATTCCATCCATGTACTT  
AGACAAGCAACTTAAGGAAGACAAAGAATACGGCCTCAGCCTCTTCACTCCAAACATCGAGACTAGCATG  
AAGTGGTTGGACACAAAGGAACAAGGTTCAAGTGAAGCAACAATACTTTCTATGGGTGGTCAGAGCTTCTG  
AAGACAGCAAGTTTCCAACAATTTTCATGGCCAAGACCTCAGAGAAAAGGCTGGTGGTCAATTGGGGCCC  
TCAACTTGAGGTCTTGGCTCACCAGGCAGTGGGATGTTTCGTGACTCACTGTGGTTGGAATCAACGCTT  
GAAGTTTTGTGCCTTGGGGTGCCAATGGTTGCTATGCCCCAGTGGACTGATCAAACGACTAATGCGAAGT  
TCGTGGCTGATGTGTGGAAGGCAGGGGTTTCAGTAGAGGTTAATGATGAGGGGATTATTACGAGAGAAGA  
GATTAATAAACGAATTGGACAAGTCATGGCAGGAGAAACGAGAGAAGAACTGAGAAAGAATGCTAGCAGT  
TGGAGAAACCTGGCGAGAGAGGCAGTAGATGAAGGTGGGAGTTCTGATAAGAATATTGAAGAATTTGTTT  
CTAAACTAGTACAAATGCCAATGTATAATCTATAA

>GWHPAAAL000847

ATGGCCTCTAAACCCATTTTCATCTTGGTACCCCTATTGGCCCAAGGCCACATGATCCCCATGATCGACA  
CCGCGAAGCTCTTGGCTCATCAAGGCGTCTCATCACGATCATCACGACGCCCGTCAATGCCGACAGCAT  
CAAACCAACAGTAAATCGCGCCGTCAACACAGGCCTGGAAATCCGAGTTGCCAGACTCCGTTTTCCATGC  
GCTGAGGCTGGGCTGCCGAGGGCTGCGAGAATTTGGACATGCTCCCTTCGCCGAGGCCGGCATCAAGT  
TTTTCAATGCGCTCGGCATGCTGAAGGCACCGATGGAGAACCTGCTCGGCGAGATCGAGCCCTCGGCCAC  
ATGCATAATCTCCGACATTTGTCCGCCGTGGACGATGCACGTGGCTAAGAAATTTGCATCCCGAGAATTG  
TTTTCTCCGGCACCGATCGAGCTAACCAAAGTCCAGGTTCCCTGCACCACAAATCCGACGTCGGCGGGTT  
TGAAAGATCTGAGCGACCAAATCGTGGAGGCTGAGCAGGCGGCATATGGGATGGTGGTGAATTCCTTTGA  
AGAAATGGAACAGAGTACGTGCAATACTACAAACAGGTAACCGGCAAAAAGGTGTGGTGCATCGGCCCT  
GTTTCGCTATGTAACAAGCTTGACTCCGACAAAGCGGAAAGAGGCAAAAAGGCTTCGATTGAGGATACCG  
ATTGCCTCAAATGGCTCGATTGCGACAACCCAGATTCCGTAATCTTCGCCTGCCTCGGAAGCCTCCACTA  
CCTTTCGACTTCGCAATTAATAGAGCTGGGGCTCGCTCTCGAATCGTCAAATCGACCCTTCATTTGGGTC

ATCGGATTTGTGTCCGACGAACTAGGAAAAGTGGTTATCGGAACAACGATTTCGAGGAAAGGAACAAAGGAA  
AAGGCTTGATAATCCACGGCTGGGCACCGCAGGTGCTTATTCTTTTCGCACCCTTCGATTGGGGGTTTCTT  
GACGCACTGCGGATGGAACCTCATGCTCGAAGGGCTGTCCGCCGGCGTTCCGATGATCACGTGGCCTCTC  
CACTCGGAGCACTTCTACAACGAGAACTGATTCTGCAAGTGCTCAGGGTCGGAGTTAGGGTCGGGGTGG  
AGTTTCCGGTGCTGATCGGGGAGGCATTAAATGTTGGGTTTATTGTGAAGAAGGAAGAGATCGAGGCGGC  
TGTGGAGAGGCTAGTGGGTGAAAAGGAAGCCGAGAAAATAAGAAAAGAGGGTCGGAGAGCTGCAGGGGAAG  
GCAAAGATGGCAATGAAAGACGGGGGTCTTCTCATATGCGCCTGGAAATGTTTCATCCAGGATATGGTGG  
AACAACTCTTCTTTCAGAAAAATATAA

>GWHPAAAL001759

ATGGAACAAGGAGTTGGTGTTCATCCCATCCCGCGATGGGTACCTCATATCCATGTTAGAAACCG  
CAAAGCTTCTCGTCAATCGTGACCAACGTCTCTCTGCAACGGTCCTCTTCAAACCTGCCCCAAGACGC  
CGGCTTCGCTACCTATATGCAGTCACTTTCCTCTTCAGCTTTCGCCGCTCGCCTGAGATTAGTCATTCTA  
CCGTTCCGAAAAACCACCGTCGGAGTCGTCCAAGCTGATATCATAGAAAGCCACATGCCAAACGTCA  
GGAACGCCGTCCGAGAAATCGGAGAATCCCGTGTGGCCGGTTTTGTGCTCGACATGGTCTGTACAAAAT  
GATCGACGTGGCCGACGAGTTTGGATTTCGACTTACACTTACTTCACGTCCAGCGCCGGGTATCTGGGT  
CTCTATTCCACTTCCAGAGTCTCAAGGATCCCTACAATCTCGCTTCCAATTACAAGGATTGGGATTCCG  
ATAAAAAGGAATTGTTGGTTCGAGTTTCGTCAATCCCGTCCCAGAGAAAATCTGCCGTTGGAGATGCT  
CGACCACCAAGTTCGCTAGTCTCGAGCTCGCCCGCGGCTCGTAGAACCCAAAGGGTTTTGGTCAAC  
ACATTCTCCGAGCTTGAATCTCACGCGCTTCATTCCCTCTCCGGCGAAACAATCCGCCTGTTTATCCGA  
TCGGACCCATATTACTCGCGTCGGAACCCCGCTATAATTGCCTGCAGGGCAACGAAGAAAGTATCATGAA  
ATGGCTTGAAAGCAGCTGCCCTCTTCCGTAGTGTCTTGTGCTTCGGAAGCGCCGGAAGCTTCCCTGAG  
GCGCAAATCAAAGAAATTGCGTACGCGCTTGAAAACAGCGGCCACCGGTTCTTGTGGTCCCTACGGCGAC  
CACAGGCGGAAGGGCAGAGGTATCCAACCGAATACGACGACCATCTGAAGTCTGCCGGAAGGATTCTT  
AGAACGGACGATCAATACAGGGAGGGTGATCGGATGGGCTCCACAGGTGGCGGTGCTGTCCCACCCGTCG  
ATCGGAGGTTTCATCTCGCACTGCGGTTGGAATTGCTTGTGGAGAGCTTGTGGTTCGGAGTGCCGGTGG  
CAGCGTGGCCAATTTACGCGGAGCAGCATGTAAATGCTTTCAGATGGTGAGGGAATTGGGGTTAGCGAT  
GGAAATAAAGATGGATTACCGGAAGACAAATTCAGTGCTTGTGACGGCGGAGGAAATCGAGAGTGGTATA  
AGGCGGCTCATGGCGGAGGAGTGTGGCGGCGGTGGTGGGAATTAGAGAGAAGTTGAGAGATATGAAGG  
AGAATGGAAGGATGGCGGTGGCTGAAGGCGGCTCATCGTACATCTCACTCTCGCGTTTCATTGAGAATGT  
TTTAGGCCACACACTCAATAA

>GWHPAAAL001760

ATGGAACAAGGAGTTGGTGTTCATTCCCATGCCGGCGATGGGCCACCTCGTGTCATGTTAGAAACCG  
CGAAGCTTCTCATCAAACGTGACCAACGTCTCTCCGTAACGGTCCTAATCTTCAAACCTTCCCTTCGACAC  
CGGCATCGACACCTATATCCAGTGCCTTTCCTCTTCATCTTCCGCCACTCGCCTGAAATTAGTCAACCTC  
CCAGACCCCCAAAAACCACCGTCGGAGGAGGAGGAGGATTCCCAAATCGTTCTTGTCTGATCTCATAG  
ACAGCCACAAGCCACACGTCCGGAACGCCGTCCGAGATATCGGCGAATCCCGGTAGCGGCATTCTGTGT  
CGACATGGTCTGTACAACATGATCGACGTCGCCGGCGAGTTCGGCCTTCCGACTTACACTTTCCTTCCCG  
TCCAGCGCCGATTTCTGGGTCTCTTGTTCACCTCCAGATTCTAATGGATCACCACAATCGGGACGTGT  
CCGATTACAGGGATTGGGATTTAGATAAGGAATTGTGGTCCCGAGTTACATCAATCCCGTCCGGCGAA  
AGTACTGCCGTTGGCGATGCTCGACAAACAAGAAGTGGTGTCTCCCGAGTAGTCACGCTCGCCCGGAGG  
CTACGAGAAACCAAGGGATTTGATCAACACATTCGCGAGCTTGAATCTCACGCGCTTCATTACCTCT  
TGAGTGAAACAACCCCCCTGTTTATCCAATCGGACCCGTATTACTCGTACCTGAACGCAGCTTTAACGG  
AGTGACGGCTACAACGAGGGTATCATGATATGGCTGGAAAATCAGCGGCCCTTCCGTGCTGTTCTTG  
TGCTTCGGAAGCGCGGAAGCTTCAACGAGGCACAAATTAAGGAAATTGCCACGCGCTTGAAAAACAGCG

GCCACCGTTCTTGTGGTCCCTACGGCGACCACCGCCAGAAGAGAAGAAAATTGAGCTACCGACCGACTA  
CACCGACCCGTTGGAAGTCCTGCCGAAGGGTTCTTAGAACGGACGGTCAATACAGGGAGACTTATCGGG  
TGGGCTCCGCAGGTGGCGGTGCTTTCCCACCCGTCGGTCGGAGGTTTATCTCGCACTGCGGTTGGA  
CGGTGTTGGAGAGCTTGTGGTTCGGAGTGCCGATGGCAGCGTGGCCGAATTACGCGGAGCAGCAGATAAA  
TGCTTTCCAGATGGTGAGGGATTTGGGATTGGCGGTGGACATAAAGATGGAGTACCGGAAGGAGAATCCA  
GTGTTGGTGAAGGCGGAAGAAATCGAGAGTGGTATAAGGCGGCTCATGACGGAGGAGAGTGGTGGTGAA  
TTAGAGAGAAGTTGAGAGAGATGAAAGAGAAAGGAAGGATGGCGGTGGCGGAAGGCGGCTCATCCTACAC  
CGCACTCGCGCAGTTCATTGAAAAATGTTCTACGGCCTTCACAGATGATAGATCGTAAGTGGTGA

>GWHPAAAL001761

ATGGAATAATGAGTTGGTGTTCATCCCATGCCGGTGATGGGTACCTCCTATCCATGTTAGAAACCG  
CGAAGCTTCTCATAAATCGTGACCAACGTCCTCTGTAAACGGTCCTCCTTCAAACCTGCCCTTCGACAC  
TGGCGTCGACAACTATATCCAGTCGCTTCTTCTTCGGCTTCACCTCTCGCCTGAGATTCATCAACCTC  
CCGACACCGAGAAACCCCTCGTCGGAGGAGATCCCAAAACGTTTCATGATTGACCTCATAAAAAGCCTCA  
AGCCACACGTCAGGAACGCCGTCCGAGAAATTGGCGAATCCCGTGTAGCCGGGTTCTGGTTGATATGTT  
TTGCCACGACATGATCGAAGTCGCCGAGGAGTTTGGTCTCCCGACGTACGCTTCTTCACGTCAAGCGCA  
GGGTTTCTGGGTCTGGTGTCCACGTCCAGATTCTCAAGGACCACCACAATCAGGACATTTCCGATTACA  
AGGATTGCGATAAGGAATTGTCTGTCCCCAGCTTCGTCAACCCCGTTCGGCGAAAAGTCTGCCAACGAC  
GATGCTTGAAAAAGAAGAAGGCGGTTTGTGATCGTCTATCACTTGACGGAGGTTACGAGAAACCAAA  
GGGATTTTGGTCAACACGTTGCTGAGCTTGAATCCCACGCGTTTAATTCACTTTCGTGTGGAAACAACC  
CGCCACATTATCCAATCGGACCCATATTACTCGAACCTGAACGCAGCGACGAGAGCGTGCAGGGATATGA  
AGAGAGCATCATGAAGTGGCTTGACGATCAGCCTCCGTCGTCCGTATTGTTCTTGTGCTTCGGAAGCATG  
GGAAGCTTCAAAGAGGCGCAAATTAAGAAATTGCCACGCGCTTGAACAGCGGCCACCGGTTCTTGT  
GGTCTCTGCGCCGCCACCGCCGAAGGGAAGAAAATAGGGTTTCCGACCGACTATGACGACCCGTCGGA  
AGTCTTGCCGAAGGGTTCATAGAGCGGACGGCCGATAACGGGAGAGTGATCGGGTGGGCCCCGAGGTG  
GCGGTGCTGTCCCACCCGTCCATCGGAGGTTTCGTCTCGCACTGCGGTTGGAATTCGACGTTGGAGAGCT  
TGTGGTTTGGAGTGCCGATTGCGGCATGGCCGATTTACGCGGAGCAGCAGATAAACGCTTTCCAAATGGT  
GAGGGATTTAGGGTTGGCGGTAGATATAAAGATGGAGTACCGGAAGGAGAATCCAGTGTTGGTGACGGCG  
GAGGAAATCGAGAGTGGGATAAGGCGGCTCATGGCGGAGGAGAGTGGTGGTGAATTAGAGAGAAGGTGA  
GAGAGATGAAAGAGAAAGGAAGGATGGCGGTGGCGGAAGGCGGCTCATCCTACACCGCGCTCTCGCGTTT  
CATTGAGAATGTTCTACAGCCACACACTGA

>GWHPAAAL002229

ATGAAATCTGATGCAATAGTGCTCTACCCGGCTCCCAGCATTGGCCATTTGGTCTCCATGGTAGAGTTGG  
GTAAGCTTATACTCAACCGTTACTCCACAAGCTCGGATTCTCAATCATCGTCTTCCTCACAACCGGAAA  
CCTTTCCGACAACGAAACCACCTCCTACATCCACCACGTCTCCAACACAAACCCATCCATCACCTTCCGC  
CGCTTCCCCTTCGTCTCCGTCGATACCTCCCCACACGCAGCCCTGCCGCCATTCACTTCGACTTCATTC  
GCCTCAATGCCGACAATGTTCTCCACGCTATTGAGAAAATCCCAATGTCATCCGCGCACTCGTTATAGA  
TTTCTTTTGCCTCAGCAATCCCCATAGCCAGGGAGCTCAGACACCCTGTTTACTTTTCTTCACGTCT  
GGTGCTTATGCCCTAGCCTTCTATCTCTACTTCCCCACCGTCCACAAACAGGTGGACCAGAGCTTCAAGC  
ACCTCAACAAAACGTTTCTTCAGTTCCCTGGATTTCTCCAATTCGAGCTTCTCACGTGCCTGAACCGGT  
GCTCGATCGAGACGATCCTGCTTATGCTGACATGGTATGCTTTTGGGATCATCTTCCCAAGCTGACGGA  
ATCATAGTGAACACATTTGACGCTCTTGAGCCAATGGCTTGCGAAGCAATCGCATCAGGTGCTTGCCTTC  
CTGATGCAACTACTCCCCAATTTACTGTATTGGGCCTTTGATAGCCAACACAAGTGAAGGTGGTGGTGA  
AAATGGAATGCCAGTCTCGGTAGGAGTAGTGAGCGTGAAGCCAAGCACGAGTGGTTGTATGGCTTGAT  
GCTCAGCCAAAAGGTAGCGTCGTCTTCTTGTGTTTCGGCAGTAGGGGTTTCGTTCACTAGGAGGCAGCTTA

AAGAAATGGCTCATGGGTTAGAAAGAAGTGGACAGAGATTCATGTGGGTCTTAAAAATCCCCACCTTGTGA  
TGCTGCTGCTCCAGCAACCGAGTTCTGTTTGAAGATGTGTTGCCCCAGGGGTTTCTGGAAAGAACAAAG  
AAGACAGGAATGGTGGTGAGGTCATGGGTTCCACAAGTGGCAGTGCTGAATCATGGATCGGTGGGTGGGT  
TTGTGACTCATTGCGGGTGAATTTCGGTGCTGGAAGCGGTGGTTGCGGGGTGCCAATGGTGGCTTGGCC  
GCTATATGCGGAGCAGCATGTGAACGGGGCCGCACTGGTGGAGAACATGAAGATGGCTATTCCTTTGGGA  
CAAGAGAAAGAAGAAGACGATGATGGGTTTGTGTCCGCTGCTGAATTGGAGAAAGCACTTAGAGAGTTGA  
TGGAGTCGGAGGGAGGAAGAGAGAGGAGCTTGAAGATGAGAGAGATGGCCATGGCAGCTTGGGAGAATAA  
CGGTTTCATCCACCACATCGCTAGCTAAGTTCGTGAGTGGCTGGAGGGTTCTTAA

>GWHPAAAL003558

ATGGCTTTGATTCCAGCCAGCGACAAGCCCCACGCCGTGTGCATACCGTTGCCGGCACAGGGCCACATTA  
ACCCAATGCTCAAGTTAGCAAAGATCCTCCATAGCCGAGGCTTCCACATCACCTTCGTCAACACCCACTT  
CAACCGCAACCGCCTCCTCCGTTACGTGGACCCTCCGCCCTAGACGGCCTGCCGGACTTCCGATTTGAC  
TCCATCCCCGATGGCCTCCCGCGTCTGACGCCGACGCCACCCAGGACATCCCTTCGCTGTGCGAGTCCA  
CGCCGAAGCACTGTCTCGAACCTTCTGCGACCTCATCACCAGAACCAATGAAGACGCTGGAGTACCTCC  
AGTAAGCTGTATCGTCTCCGATGCGGTGATGAGTTTACGCTGAAGCGCGGAGAGGTTTGGGTTACCG  
GAAGTGCTGTTCTGGCCGACGAGCGCGTGTGGGCTGTTGGGGTATACACAATATCACAAGCTCGTTGAAA  
GAGGATACACCCCACTCAAAGATATCAGTTACGTGACAAATGGGTATATGGAAACAACAATAGATTGGAT  
CGCCGAATGAAAGACATCCGGTTAAGGGATCTACCCAGTTTTATTTCGAACCACCGACCCCAAAGACACC  
ATGCTCAATTTCTCATCAGCGAATGCGCCGCCATCCCCACCGCCTCCGCCCTGATCCTCAACACCTTCG  
ACGCCTTGGAACGCGAATCCATCGACGCCCTCTCCGCCGTCCACCCCGGATCTACACCGTCGGCCCTCT  
CAACCTGATGCGAAATCAGATTAACGACGATCGAATCGAGTCAATCGGGTCGAATCTCTGGAAAGAGGAT  
CCAGGCTGCATCGAGTGGCTGGATTCTGAAGGAACCCGGGTCGGTAGTGACGTCAATTTCCGTAGCATCA  
CCGTGGTGACGACGGGTCAGCTCACTGAGTTCGCCTGGGGACTCGCCAACAGTGCCCGGCCCTTCCTGTG  
GATACTCCGACCCGACATAGTCGCCGAGATAAGGCGATGATTCCGCCGGAATTTCTGGCGGAGACAAAA  
GGGAGGGGTATGCTGTGAGTTGGTGCCTGCAGGAGCAGGTGCTGAGGCATCAGGCAGTGGGTGGATTCT  
TAACCCACAGCGGGTGGAACTCCACCGTGAGAGTCTATGCGGCGCGTTCCGGTGATCTGCTGGCCCTT  
CTTTCGAGAACAGCAGACGAACTGCCGTTACAGCTGTAGGGAATGGGGGTGGGGATGGAGATAGATAAT  
AATGTGAAGAGGGACGAAGTGGAGGCGACGGTGAGGGAGCTGATGGAGGGAGAGAAGGGGAAGGAAATGA  
AAAGGAGGGCGGCGAGTGGAGAAGAAGGCGGAGGAGGCCACCGGAGCTGGTGGGTCTTCTCAGGTGAA  
TCTTGAAAACTATTTAGTGAGGTGCTCTTGGTAACTCTGATGAGTGA

>GWHPAAAL004075

ATGTCCGACTCCGGCAACAAACGACCTCACGTCTCGTCTTTCCTTACCCTGCGCCGGGACACATCATCC  
CTCTCTCGATCTCACCAACTCTTGCTCTCCAGCGGCCTCACCGTGACCGTAATCGTCACCCCCGAGTT  
TGCTCTCTACTCGATCCCCCTCTTTCGTCTCACCTTCTCTCTATCCAACCCCTCGTTCTCTCTCTA  
CCGAAAGCCCCGGCTTCCTTGGTGCCTAGCCTTAGAGCCACAGGCGAGCTATACGATCCGATCCTCCAGT  
GGTTTAAATCCCACCCTTCGCCGCGGTGGCAATCGTGTCGATTCTTTCTGGGTGGACCGAAAACT  
AGGGAAGGAACTCGGCGTGCCGCTCTGGTTTTCTGGGCGTCTTGCTCTTTCTTCATTGATTTCCAGC  
TCCATTTGGCGGGATCGGCCGAAGGTGGACGATCCGGCCGACGAGAATTTCTTCTTCTTCTCCCGGAGA  
TACCGAATTCTCCGAAATACCCCTATGGCAGATGTCCACGCTTTTCCGTATGTTCAGGAAGGAGACCC  
AGACTGGGAATTCATCCGAGAAGGGATGGTGGCGAACACAGTGAGTTGGGGTGTGCTGTTCAACTCGTTC  
ACTGAGTTGGAGGGGTATACATCGATCACAAAGAAAGAAATGGGCCACGATCGGGTTTGGGCTGTGG  
GCCCCGCTTTTACCACTAGACGGGGCCCCCACTTCCCGTGGTGGTTCTAGCGCCGTGGCGCCGCATAAGGT  
GACGGTTTGGCTTGATGATAAACCGGATGACTCGGTGGTCTATATATGCTTCGGAAGCCGTATGGAGCTG  
ACGACTGCGCAAGGGACGCGCTGGCAGCTGCACTGGAGTCTAGCGGGGTGCACTTCATCTGGATCGTTA

AAGCAGGAATCGACGATGGAGACCCGATCCCGAACGGGTTTGAGGATCGTGTGGCGGGAAAAGGTTTAAT  
AATCAGGGGGTGGGCCCCGAGGTGCCGATACTGATGCACCGGGCGACCGGCGCGTTTCGTGACTCACTGC  
GGGTGGAACCTCGGTGCTGGAAGGGATTTCGCCCGGGGTGATGATGCTGACGTGGCCAATGGGTGCCGACC  
AATTCTACAATGCCAATTTGTTGGTTGACGAGTTACACGTGGCGGCTCGGGCTTGCGAAGGTGGGGATGA  
GAAGGTTCTGACTCGAGCGAGTTGGCTCGGTGTTGGCCGAGTCGGTGAGTGGTAAGAGACTGGAGAGA  
AGTCGAGTTGTGCAGCTGCGTGATGCGGCGGTGGAGGCGGTGAGGGGAGGAAGTTCAAGCAAAGACATCG  
ATGATTTAGTTAAAGAGCTTGGTGAGCTTGGTTGTGAAAAAGCTTGA

>GWHPAAAL004076

ATGGCGATCTCCGGCTCCGGCAAACATGTCTTAATATTCCCGTACCCATCGCAGGGCCACCTGATCCCGC  
TCCTCCACCTCGCCACCGCCTTGCTGCCCGCGGCCTACCATACAATTTTAGTCTCCCTCAAACCT  
CCCTCTCTCCACCTCTTCTCTCCGACCACCTTCCATGGAAACCTTGATTGCCTTTCTCCACCCAC  
CCTTCCATCCCAGCCGAATCTACGACTGCAGGGGCCACCTCCCCGACTCCGTCCGCTCCACTTTGTTTCG  
CCATATCCGATCTCTACGAACCAGTCCCTCGACTGGTTCGAAACCACCCATCGCCGCGGTGGCGATTCT  
CTCCGACAAGTTCATGGGGTGGACCAAAATCTCGCATGCCAACTCGGAATTCATTGATTGGCGTTCTCCC  
CTGTGCGCGCCATGGCCGTCTCATTGGTTTATTCCCATTTGGCGAGATTTACCGGCGAGAAACATCGGCGG  
CAGTGAAAAATGACGCACTGGTTTCATTTCATGAGGAGCTACGTGGAAGGAGACCCAATTTTCGAATTCAT  
CAAAGAAGGGATGCAGGCTAATATGGCGAGTTGGGGACTCGTGATCAATACTTTCAATGAACTGGAAGGG  
GTTTATCTGGATCATCTAAAGGAGAAAATGGGTCACGATCGTGTGTTGGGCGCAAATGGAGGCCATTGCAA  
TCGGCCTAGAAAAAGTGAGGCCTACTTCTTATGGTCCATTAGGGGTTCCTACTGAAGGAGTTATCGACGG  
CGAGTTCGGGGAGGTTCCCGCCGGATTCTGAAGATCGGACGTCGGCGAGAGGACTCGTCTGAAAGGGGTGG  
GCACCGCAGCTGTCGATATTGCGTCATCGAGCTGTGGGATCCTTCCTGACGCACAATGGGTGGAACCTCTA  
CGCTGGAAGCGCTGGTGGCTGGGGTGCCAATGCTGGCGTGGCCGATGGGAGCAGAGCAGTTTCATGAATGC  
GACCTTATTAGTGATCAGGCGAAAGTGGCGGTAAGAGTGGCGGAGGGTGCACGGGATGTTCCGAATCCG  
TTTGAGTTGGCTCGGGCGGTGACTCGAGTGATGGATGGCCGGAGCGTCGAGAGAGTTTCAGGCGGTGAGGT  
TGCGTGAAGAGGCATTGAATGCCGTCAAAGAAGGTGGGAGCTCATACCAGAATTCGATGGGTGGCCAT  
GCATTTGTTCAACAATGAATAG

>GWHPAAAL005635

ATGGCAACGTTTCAATCGGAATCGTCTCCTCATATTCTTCTGTTTCCGTTTCATGTCAAAGGGCCACACCA  
TCCCAATCCTCCACCTGGCTCGCCTTCTCATCCACCGCAACGCCGCCGTGACCATCTTCACCACCCCCGC  
CAACCGCCCCCTTCGTTTGTCACTCTCTCTCCGACACCACTGCGACCGTAGTTGACCTCCCGTTTCCGGAA  
AATATCCCCGAGTTCTCCAGGCGTGGAGAGCACCAGACAACTCCCACGGCTTCCTTGGCTGGACCGTG  
GAATCGGCGGCCGAATTCGGCATCCCGCGGCCCGCTATTACGGTATGAATAACTTCTCCGAGCTATTTG  
TCACGACGTGATGACGCATCGTGACCTCATCGAACC CGGTCCGGCGATGAACTGTTCCCGGTCCCCGT  
TTTCCATGGATAAAGGTCCCGGAAACGATTTTGAACCGGCGCTGTCAGCTTCCCTCTGCTGGCGATG  
GCTATGGCCTCCAATGGGAGTTTACGATTGAGGTGGTAGAAGCAACTTCCAAGAGCTACGGTGTGTCGT  
GAACAGCTTTTACGAGCTCGAGCCGGCCTACTTGAATTACTGGAATTCGAATATTAGGCCCAAGGCCTGG  
TGCGTGGGCCCCGTCTGCCTGGCGGAGCGGCCGCGTGTCAAACCGGAGAACCACCGGAAACCGTCGTGGA  
TCCAGTGGCTGGACGAAAAGCTGGAAGAAGGCAAACCTGTTCTCTACGTGGCGTTCCGTTCCCAAGCGGA  
GATCTCGCCGGAACAATTCGAGAGATCAAAACCGGGTTGGAGAAATCCGAATCGAATTTCTTGTTGGGTC  
GTCAGAGGAGGCTGTGCGAACTCATCGACGACGATGGGTTCGAGGAGAGAGTGAGAGAAAGGGTCTGG  
TAGTGAGAGAGTGGGTGATCAGAGGGAGATATTGGGACATGGAAGCGTAAAGGGTTTCTGAGTCACTG  
CGGGTGGAACCTCGGCGTTAGAGAGCATATGCGCGGCGGTGCCGATTCTTGCGTGGCCGATGATGGCGGAG  
CAGCCGCTGAACGCGAGGATGGTTGTGGATGAGATAAAGGTGGGGCTGAGGGTGGAGGCGTGCATGGGT  
CGGTGAGGGGGTTCGTGAAGTGGGAGAGTTTGGAGAAGATGGTGAGGGAATTGATGGAGGGAGAGATGGG

GAAGGAGGTGAGGAAGAAGGTGAAGGAGGTGGGAGCGGCGCGGTGGCGGCGGTTCGAGGAGGTGGGTCTG  
TCGTGGAAGACGTTAAATGAGCTCATTAATGAGTTATCGTGA

>GWHPAAAL005636

ATGGCAACGTTTCAATCGGAATCGTCTCCTCATATTCTTCTGTTTCCGTTTCATGTCAAAGGGCCACACCA  
TCCCAATCCTCCACCTGGCTCGCCTTCTCATCCACCGCAACGCCGCCGTGACCATCTTCACCACCCCGC  
CAACCGCCCTTCGTTTGTCACTCTCTCCGACACCACTGCGACCGTAGTTGACCTCCCGTTTCCGGAA  
AATATCCCCGAGTTCTCCCAGGCGTGGAGAGCACCACAACTCCCACGGCTTCCTTGGCTGGACCGTG  
GAATCGGGCCGAATTCGGCATCCCGCGGCCGCTATTACGGTATGAATAACTTCTCCGGAGCTATTTG  
TCACGACGTGATGACGCATCGTGACCTCATCGAACCCGGGTCCGGCGATGAACTGTTCCCGGTCCCGGT  
TTCCATGGATAAAGGTGCGCGGAAACGATTTTCAACCGGCGCTGTCAGCTTCCCTCCTGCTGGCGATG  
GCTATGGCCTCAATGGGAGTTTACGATTGAGGTGGTAGAAGCAACTCCAAGAGCTACGGTGTGTCTGT  
GAACAGCTTTTACGAGCTCGAGCCGGCCTACTTGAATTACTGGAATTCCAATATTAGGCCAAGGCCTGG  
TGCGTGGGCGCCTCTGCCTGGCGGAGCGGCCGCGTGTCAAACCGGAGAACCACCGGAAACCGTCGTGGA  
TCCAGTGGCTGGACGAAAAGCTGGAAGAAGGCAAACCTGTTCTCTACGTGGCGTTCCGTTCCCAAGCGGA  
GATCTCGCCGGAACAATTCCGAGAGATCAAAACCGGGTTGGAGAAATCCGAATCGAATTTCTTGTGGGTC  
GTCAGAGGAGGCTGTGCGAACTCATCGACGACGATGGGTTTCGAGGAGAGAGTGAGAGAAAGGGTCTGG  
TAGTGAGAGAGTGGGTCGATCAGAGGGAGATATTGGGACATGGAAGCGTAAAAGGGTTTCTGAGTCACTG  
CGGGTGAACTCGGCGTTAGAGAGCATATGCGCGGCGGTGCCGATTCTTGCGTGGCCGATGATGGCGGAG  
CAGCCGCTGAACGCGAGGATGGTTGTGGATGAGATAAAGGTGGGGCTGAGGGTGGAGGCGTGCATGGGT  
CGGTGAGGGGGTTCGTGAAGTGGGAGAGTTTGGAGAAGATGGTGAGGGAATTGATGGAGGGAGAGATGGG  
GAAGGAGGTGAGGAAGAAGGTGAAGGAGGTGGGAGCGGCGCGGTGGCGGCGGTTCGAGGAGGTGGGTCTG  
TCGTGGAAGACGTTAAATGAGCTCATTAATGAGTTATCGTGA

>GWHPAAAL005637

ATGGCTTATCCTCCACCTTCTCCCGCACTGCACATTGCTCTCTTCCCTTCATGTCCAAAGGCCACACCA  
TTCCGATCATCCACCTAACAAGACTCCTCCTGAACCGCGGCCATAAAACACCGTTTTCACCACCCAGC  
AAACCGCCCTTCATCTCTGACTCCCTCACCGGCACCGACGCTCCGTCATTGTTCTCCCTTCCCGGAA  
AACATCCCAGGAATACCGTCCGGCACCGAAAAGCACCACAACTACCGTCAATGTCCCTCTTCGTCCAGT  
TCGCCAACGCCACAAACTCATCAACCTCACTTCGAGCAAGCCATCAAGTCACTCCCCAACCTCAACTG  
CATGATATCCGATGGCTTCCTCAGCTGGACCCTCCAATCGGCATCTAAATTCGGCATCCCAAGGCTAGTC  
TTCTACGGTATGAACAATACTCCATGGCACTAACTACGACGTGACCGTCAATAGGCTCCTCTCGATAC  
CCAAATCGGACAACGAGCCATTGTCGTCCTAACTTCCCTGGATCAAACTACCAAGAATGACTTCGA  
AGAGCCCTTTAACGAGGTTGAACCAAAGGGACCTTATGTGAATTCACCATCGAACAGAGTCTAGCCACG  
TTTAATAGCTACGGTCTGATCGTGAACAGCTTCTTCGAGCTCGAGAAGCCGTTTCGTGGAGTACTGGAATC  
GCGCGAGCAAACCGAAAGCTTGGTGCATTGGGCCTCTCTGTTTCGAGAACCGGAAATGATCATCGAAAG  
AAAGCGCAAACCAAAGCCCAAGTGGATCGATTGGCTGGACCAAAAGCGAGACCAGGGGAAAATCCGTTCTG  
TACGTTGCGTTTGGGTCTCAGGCGGAAATTTACAGAAGCAGCTGCATGAAATAGCAATGGGGTTAGAGA  
AATCGGAGGTGAACTTTCTATGGGTGATGAGAAAGAAAGACACGCCATTGAGGGAGTGCCGGAGAGAGG  
AATGGTAGTGAGAGACTGGGTTGATCAGAGGGAGGTGTTGGCACACGAGGGGGTGCGGGGGTTTCTGACG  
CACTGCGGTTGGAACCTCGGTGTTGGAGAGCATATGGGCAAGGGTTCCGATACTGGCGTGGCCGATGATAG  
CGGAGCAGCACCTGAACGCGAGGATGGTGGTGGAGGAGATCAAAATCGGATTAAGAGTGGAGACGATTGA  
CGGCTCTGTAAGAGGGTTTGTGAAGAGGGAAAGCTTGGAGAAGATGGTGAGGGAGCTGATGGAGGGGGAT  
ATGGGGAAGGAGGTGAGGAAGAAGGTGGAGGAGGTCGGAGAGGCGGCCGAAAAGCAATGACAGAGGGTG  
GGTCTCCTGGGATGCCCTGAATCAGCTTATTGATGAGATAAAAAGCACATAG

>GWHPAAAL005638



ATGGCTTCTCCTCCACGTTCTCCACACCACACATAGCTCTCTTCCCTCTCATGTCCAAAGGCCACACCA  
TTCCTTATCCACCTAACAAAGGCTCTTCTGAACCACGGCTTTAAAACCACCGTTTTACCACTCCAAC  
AAACCGCCCCCTCATCTCCGACTCCCTCGCCAGCACCGATGCTCCGTCGTCATTCTCCCCCTCCCAGAA  
AACATTCTAGAAATACCCTCCGGCACACAAAGCACCAAACTATCGTCAATAGGAAGCCATCAAGTCT  
CTCCCCAATCTCGTCTGCATGATATCGGACGGCTTCCCATAAAAAACGACTTTGACGAGCCCTCAACGA  
GATCGAACCAAGGGACCTTATGCGAAATTCATCATGGAACAGGGTGTAGCCGACTCTAACAGCTATGGT  
ATGATCGTGAACAGCTTCTACGAGCTCGAGAGGCCGTTTGTGGAGTACTGGAATCGTGAGGGCAAAGTGA  
AAGCTTGGTGCCTTGGGCCCTCTCTGTTTTGCCGAACCGGAGATGATCATCAAAAGACAGAGCAACCCTAA  
GCCCCAATGGATCGATTGGCTGGACAAAAAGCGAGACCAGGGAAAATCGGTTTTGTACGTTGCGTTTGGG  
TCTCAAGCGGAAATTTACCGGAGCAGCTGCATAAAATAGTGATGGGGTTAGAGAAATGGAGGTGAAGT  
TTTTATGGGTGAAGAGAATGAAAGATACATATATTGTGGGAATGACGGAGAGAGGAATGGTAGTGAGAGT  
CTGGGTTGATCGGAGGGAGGCGCTGGCGCACGAGGGGGTGCAGGGGTTTCTGACGCACTGCGGTTGGAAC  
TCAGTGTGGAGAGCATATGGGCAAGGGTCTGATACTGGTGTGGCCGATGATGGCAGAGCAGCAGCTGA  
ACACAAGGATGGTAGCGCAGGAGATCAAAATCGGGTTAAGAGTGGAGATGATTGACGGCTCCCTAAGAGG  
GTTTGTGAAGAGGGAAAGCTTGGAGAAGATGGTGAGGGAGCTGATGGAGGGGGATATGGGGAAGGAGGTG  
AGGAAGAAGGTGGAGGAGGTCGGACGGGTCCTCTTGGGATGCTCTGAATCAGTTTATTGA

>GWHPAAAL006268

ATGACTCGCAAAGAAGTGCATGTCTCGTGGTCACGCTACCATTCCAGGGCCACATCAACCCCATGCTCC  
GCCTCGCCAAGCGCCTCGTCTCCAAAGGCCTTTACGTACCTTCGCCACCACCGAGACCGCCCGTCAGCG  
GCTACTCGGCGGCAGTTCGCTGCCACCTCTATACCAGGTTCCAATTTGAGTCTTCAAAGACGGTCTC  
GGTCCGGAAGTGACCGCGACAAGAACCTAGACATCTTACTGCTCGAAGCTCTGCCACCAAAGGTGTCC  
AGAATTTCTCGAATCTCATCGCCGATTTGAGCAAAAGGGGAGAAAAATTCTCGTGCGTCATCAACCAGCC  
TTTCGTCCCCTGGTCGGCGCGCGTGGCGGCGGAGCACGGCATCCCCACCGCCACGCTTTTCATTACGCT  
TTCTCTCTCTTCTCGATTTATTACCGTTATCACAAGGGATTAACTTGTTTTCCGTCGTTGGAAAAATCCCA  
ACAACACCCTGAAATTGCCGGGATTGCCCTTATGAAAGTAAGTGATCTTCCGACGTTTGTTCGCCCGGA  
GAGCCCTTACCATTTCCGGAACCTTTTGGCTGAATCTGTGAAGAGTCTCGAGAAGGTGAAATGGGTTTTG  
GGGAATTCATTCCAGGATTTGGAGAAAGGGGTGTTGGAGGCCATGGAAGAAGATTCCATTAACAATTGGC  
TTCCCGTGGGTCCCTTTTTGGCGTCGGCGTTGCTCGGAGAAAAAGAGGAAGGAATGTGGCAGTGGGTGG  
GGCCGACATGTGGAAGCCGAAGACTCGTGTCTGGAGTGGCTCGACGGCAAGCCGTTTCATCGGTGGTT  
TACGTGGCGTTCCGGAGCATAACGGTTTTGGACGGGAAGCAGATGGAGAGCATGGCGGCAGCGCTCAAGA  
ACTCCGGCAAGCCGTTTCTGTGGGTGGTCAGGTCTCCGGCGAAAGATTCTGATGAGAAGAAGAGCAACGG  
ACTTCTGAGGGATTTATTGAAGAGATGAAAGGTAGGGGACTGGTGGTGCCGTGGTGCACAGGAGAAG  
GTGTGATGCACCCGGCGGTGGCGTGCTTCGTGAGCCACTGCGGCTGGAATCCAGTTTGGAGCGGTGG  
TCGCCGGAGTTCCCGTGATCGCATTTCCGGAGTGGACCGATCAGCCGACCAATGCACAGATTGGGGTGAG  
ATTGGGTGAGAACGACCGTGACTTTAGCAGTGAGGAGGTGGAAGATGCATTCTGTGCTGTCACTGACGGG  
CCGGGAGCGCGGAGATCAAGAGAAGGGCGGCGAGCTGAAAGAAGCGGCCAGGAAGGCGGTGGCTGACG  
GTGGTTCTTCGGAACGGAACCTGAATCGGTTTATTAGTGAAATCAGCGCCTAG

>GWHPAAAL006282

CGGCACCAGCGCAGGCGGGTGGTTCTATTTCGTTACCGCTGCAGGGCCATATACCCATGGTTCAACTCG  
CCAACATATTATACTCCAAAGGCTTCCAAATCTCCATAGTTACACCCCACTTCAATTGCCCGAGCCGATT  
GAAATACCCCACTTCACCTTCCACCAATCTCCGACGGCCTGTCGGAAGTGAAGCTTCCACAGAGGAT  
ATCATCGCTCTTGTCTCCCTCCTCAATAAGAAATGTGTCGGCCCGTTTCGCGATTGCTTGATTCAAGTTAT  
TATCGGACGACTCTTCGGATCCCATTCCTGCTTGATCACCGACGCAATTTGGCACTTCAGTCAAGCTGT  
GGCGGAGGGACTTAAGCTCCGGCGACTTGTCTCCGGACGAGTAGCGTCTGTTCTTTCTCGCTTTTGCG

GCCTTGAATCTTATGAGAGACAAAGGGTACCTCCCAAAGCAAGATTCCCGATTGGAAGAAATTGTTCCAA  
AGCTTCCGCTACTCAAAATGAAAGACCTTTCATTTCATCAAAACCAAAAACCCAGAAGATCTCTACCATTC  
AGTAGGAGGCATGATAACCAACACTAGGGAATCTTCAGGGATCATCCTAAATCTTTCAAAGAATTGGAA  
GAATCTTCACTTTTCGATTCTCAAGCATGATTTTCCGATCCCAAATTTCCAATTGGATCTTTCCACAAAT  
ATTTTTCAGCAACCTCGAGCAGCCTACTAGAACAAGACCGAAGATCTATCTCTTGGCTCGACACCCAAAA  
ACCCAATTCAGTAATTTATGTGAGTTTCAGGAGCATTGCAACAATAGAAGAAACAGAATTCCTCGAAATT  
GCTCACGGATTGGTCAACAGCAACCAACCTTTCCTATGGGTAGTTCAACTGAAATTAGTCCGCAGGTCGG  
ATTGGGTGCAACTGTTACCTGACGGGTTAATAGAATGTATTAATCGGAGGGAACACATAGTTAAATGGGC  
CCCACAACAGGAAGTACTGGCCCATCCTACTACAAGAGGATTCTGGACTCACTGCGGGTGGAAATCAACT  
CTGGAGAGCATATGCGAAGGCGTTCCAATGATTTGTTGCGCGTGTGTTGGCGATCAATTTGTGAACCTCAA  
GGTATATAAGTGATGTTTGGAAAGATTGGGGTGGAAATTGAAGAATTTGGAGAAAGAAGACATCAAAAGGGC  
TATTAGGAGAGTAATGGTGGAGAAAGAATGGGAAGACATGAGATTGAGAATCATGGAACCTCAAAGAGAAG  
GTAGATTGCAGTATAAAAAGAGGATCCTCAACAGAATCATTACAAAGTTTAATTAATTACATTTTGTTCAT  
TG

>GWHPAAAL006284

ATGGATCAGGAAACGACTCTACCTCCTCATGTCCTCATCTTCCCTCTACCGTTGCAAGGCCCAGTGAAC  
CCATGTTAAAGCTAGCCGAGCTCCTCTCCATCTCCTCCCGTTCCACATCACCTTCCTCGTCACCGACCA  
CATCCATCGCCGCTCCTTCAGCACACCGATATTAAATCCCGATTGAAAAATACCCCGGTTTCCGCCTG  
GAAACCATCTCCGATGGCCTTTCGAAGAACACCCTCGCTCTGGAGACCGACTCATGGAGCTGTTTCGATT  
CTCTGAATACCGAAACTAAGAAGCTTTTCAGGGAGTTGCTGAACCTCCGGCCGCTGATCTCCGGTAATTG  
CCGTCCCATAACTGTATTATAGCCGATGGGATCATGGGTTTTACCTGTGATGTCGCGAACGAGTTCCGA  
ATTCCGATTATTTATGCACGCACGGTCAGCGCTTGCTGTCTCTGGGTTTTTTTCTGTCTTCCCAAACCTCA  
TTGAAGTCGGAGAGATTCCCTTCCAAGGAAACGATCTGGACGTGCCAATTAGGAGTGTGCCTGGGATGGA  
AGGCTATCTCCGGCGCCGATCTTCCATCTTTTTGTGCTCCGGCAACGTGGCCGGCCCAATGTCCAG  
GTTTACTTGTGCGAGTCGCAAGAGAATCCCCGAGCCCATGGGCTCATTCTCAATACATTTGAAGATTGGA  
AAGTCCGATTCTCTCTCAAATCCGGACCCTCTGTCCAAATCTGTACACAATCGGACCGTTGCACGCCCA  
CCTGAAGACAAAGCTCGCCGCTTAAGATCTCTGGCGCCGGCATCTTCGAACAGCCTCTGGGAAGAAGAT  
CGGAGCTGCTTGGCGTGGCTTGATGTCCAGCCGCCGAAGTCCGTTGTCTACGTCAGCTTCGGAAGCCTAG  
CGGTAATGTCAAAAGACCAGCTCCTGGAATTCCGGCACGGGCTAGTCAACAGCGGCCAAAGATTCTCTG  
GGTTATAAGGCCGGACTCCGGCGCAGGCGAAGGCCTGATTCCGGCGGACACAAATAATCGTGGGTACATA  
GTAGGATGGGTCCACAGGAAGAGGTTCTATCGCATGCATCTGTTGGTGCCTTCTGACTCACAGTGGGT  
GGAATTCAACTTTAGAAGCAATCTACGAAGGCAAACCCATGATCTGTTGGCCTTATTTTTTGGACCAGCA  
GGTGAACAGTAGGTTTCGTGGAGAAAGTTTGGGGACTGGGGGTTGACATGAAAGATATTTGTGATAGAGTT  
GTAATTGAGAAAAATGGTGAGAGATCTTATGGATGAGAGAGGAGGTGGGTACAAACAAAATGCCGATCAGA  
TTGCTAAATTGGCTAATGAATGCTTCAAAGCGGGTGGTTTCATCGTACAAAAGCTTGGAAGATTTGGTTAA  
GGATATAGAACTAATGATGAAATCTTATTGTGCTGAATTTGGTCACTGTGTGAAAGTGAGAACAGAAAA  
AACCAGCCGCACAAGAGAGAGCGAGAGCGAGAGGAAGAGAGAGTTGTCTTGAAACCTTGTGCATTGTTTC  
GGTCAAATGCCGATTGGAGGACGATCCACCGTTTGATCAAGCTAAAAATTTGGACAGCAGGTTTCGCAACTC  
AGTGCTCTACAATCTGAACGGTGGAATCGGATTCTGGGGTCAGCAACTACTGTTTCGGCGGGACTGTTT  
TGGGTTGTGTTTAAACCCGCGTTTGGTGA

>GWHPAAAL007266

ATGGCGTCCAAAACCGATCGTCTTCAGTTCCTCTTGATTCTCTTATGTCCCAGAGCCATCTAATTCAT  
TAACCGACTTCGCCAAACTTGTGCTCGCCGCGAATCTCTGTACGATCATCACCCTCCCTCAACGT  
CCACCGCTTCAAGTCCATCATTGGCCGGACGCCGAACGCCGACCTCAAAATCCATCTGCTCTCGATTCCA

TTCCCTGCAAGGAGGCCGGATTGCCGGAAGGCGTAGAGAACGTCGACTCTCTCGATTCTCCAGAATCTG  
CCGGCAAATCTTCTTAGCCTCTAGTTTGCTCAAATATCCGCTTGAGAACTCGTTTCGGAAATGGACGC  
CAAGCCTAATTGCATCGTCTCGAGCAATGCTTTGCCCTGGACGGTGAAATTAGGGGAGAAATTTGGAATT  
CCAACCTACTTCTTCAATCCGATCTCGTGCTTACGGTTGTCTGCTCGACGAACATTGCCATCGGAAAGC  
CGCACGAGGCAGTGTCTGCGGATTCGGAGCCTTTTGCGGTCCCAGACATGCCTCACCGGATCGAGTTCAC  
GAGGGCGCAGCTGCCGAAAACATGAGGAAGGGAGACTCCACCGACGACGTGAAGGCCGTAATGCAACAG  
ATTCGTGACGCGGTGAGCTCCGCCCGCGGGTCTGGTTAACAGCTTCGAGGAACTGGAGGCCCATACA  
TCCAATCTACAAGAAAACGGTGAAGAACCTGTGGTGCCTCGGCCAGTTCCCTCTCCAACGACGAATC  
GCCGCCCTCGTCAACCACTGATGAAAGAATCGACTGCCTGAAATGGCTCGATTCAATGAACCCTAGCTCC  
GTATCTACGCCTGCTTCGGAAGCATCTCCCGCATACCGGCTTCCCAACTGATCGAGATTGGATTAGGTC  
TAGAAGCTTCTAGAACTCCGTTCTCTGGATCATCAAAGAGAAAGACATCTCCGAGCCGGTGCAGAAGTG  
GTTAGACGACGAGAAATTCGAAGAGAGAATCAGAGGGAGGGGCTTACTGATCAAGACTTGGGCCCCACAG  
GTACAGATACTGGCCACCCCGCGTCCGTGGGTTCCTTACACACTGCGGATGGAATCCACCTTAGAGG  
GGGTCTGCGTGGACTTCCGATGATCACGTGGCCGATGATCGCCGAGCAATTCTACAACGAGAAGTTTAT  
TGTGAATGTTCTTGGCGTTGGCGTGAGGATAGGGGCGGAGGGCGGCATGGAAGCGGTGCATTCTGTTGGG  
CGTGAGGAAATAAAGAAGCGGTGGTGGAGTTGATGGGTGGGAGGAGAGAGAAGGGGGAGGAGATA  
GAAGGAGGAAGCGAGGGAGTTGGGGGAGATGGCGAAGAGGGCTGTGGCGGACGGCGATCTTCTCACCT  
GAATATCTCGTTTCTAATTCAAGATGTATGCAACAAAGTTGA

>GWHPAAAL007326

ATGGGTAGCCAAAAACCTCATGTTCTGGTAGTCCCATTTCAGCACAAGGTCACCTTTAGTCCAGCGCTGC  
AACTCTCAAAGCGCTTAGCCTCAAAGGGGTTAGGGTCACTTTCGTACCACCATGAGTTGGGCCAAGTC  
CATTGGTTCCATTAGGATGGAGCAAATTAGCGATGGCTATGAAGAACGTGAAAACCCAGAGAGCATTGAA  
GCGTTTGCCAAGCGTATCAAACCGTAATCTCGCAAAGCCTACGTGATCTAATTGAGAAACAAAAACAAG  
TTGGTTACCCTGTGAAACTAGTTGTTTACGATTCTGCTATGCCGTGGGCACTAGAGATAGCACATAAGTG  
GGGCGTCTATGGAGCTCCATACTTCACTCAACACTGCACTGTATGTGCTATCTACTACCATATGCAACAA  
GGAAATCTGAAGGTTCTCTTGAAGGAACAAAAGTCTCCCTACCTTATTGCCGCCATTAGAGAAAAATG  
ATTTGCCATCTTTCATTTGTAACCTTGTTCACACGAATTTCTCATGAAAGAGATGTTGAACCAATTCTC  
CAATTTCCACAATGCAGATTGGATCTTATTCAACACATTTGACAAGCTAGAAGATAAGGTAGTGAAGTGG  
ATGGCAAGCCAGTGGCCTATTAGAACCGTTGGACCTACTATTCCATCCATGTATTTAGACAAGCGACTGG  
AGGGAGACAAAGAATATGGCCTCAGCCTCTTCACTCCAAACACCGAGGCTAGCATGAAGTGGCTGGACAC  
GAAAGAACAAGGTTCCGTGGTTTATGTCTCATTTGGGAGCTTGGCCACCCTTGATGAAACTCAATGGAG  
GAATTATCATGGGCGCTTGTGCAGAGCAACAATACTTCTATGGGTGGTAAGAACTTCTGAAGAGAGCA  
AGCTTCCTAGCAATTTATGGAACAAGACCTTTGAGAAAGGGTTGGTGGTCAATTGGTGGCCTCAGCTTGA  
GGTCTTGGCTCACCAGGCGGTGGGATGTTTTGTGACTCACTGTGGTTGGAACCGACGCTTGAAGCTTTG  
TGCCTTGGGGTGCCAATGGTTGCTATGCCCCAGTGGGTTGATCAAACAATAATGCGAAGTTTGTGGCCG  
ATGTGTGGAGGTTAGGGTTTCGAGTGGAGGCTAATGATAAGGGAATTGTTACGAAAAGAGATTGAAAA  
GCGAATCAGAGAAGTCATGGCGGGAGAAACGAGGGAAGAACTGAGAAAGAATGCTAGTGGTTGAAAAAC  
CTAGCTAGAGAGGCAGTGGATGAAGGTGGGAGTTCTGATAAGAATATTGAGGAATTTGTTTCTCAACTTG  
TATGCTCTTAA

>GWHPAAAL007393

ATGGCCGACGACTCTAAGCTACACTTTGTGATGTTCCCATGGCTAGCCTTTGGTCACATTATTCCATTCC  
TGGAGCTCTCCAAATTCCTAGCTCAAAGGGTCACAAAATCTCTTTATTTCTCCCCAAGAAACATCGA  
TCGCTTCCCCAAAATCCCCACAAATCTCCAATTAAATTGGTAAAGATTCCATTGCCGCCGATCGAAGAG  
CTCCCGGAAAACGCAGAGGCCACCATGGACGTCCGCACGGACGATATCACTACCTCAAGAAGGCATACG

ATGGTCTCGAATCCGGTTTGACTCGTTTTCTCGAGTCAGAGTCCCCGGACTGGATCGTTATGGACTTTGC  
TCCCCACTGGTTGCCGCCGATCGCTGCGAAGTTGGGTATCTCGCGTGTCTTCTCTCGATCATCAACGCG  
TGGTTCTTGGTCTTTCTTGGGGCCTCATCGGAGGCCATGATCAACGGCTCCGATGAGCGGACAGCGCCGG  
AGGATTTACGGTCCCGCCCAAGTGGGTACCCTTCCCGACGAAGCGGCCTACAAGCTCTACGAGGCCAA  
TTGGGCTTTCCAGTCCACCAAACCTCAACGCTTCGGGATTACCGATATGTATAGATGTGGATCTGTTATT  
CAGGGGATCGACGCCATCCTCGTACGCCACTGCAATGAGTTTGAACCCGAATGGCTGACCTCCTGAAAA  
ACCTTCACGGCCGGCGGGTAATTCCGGTGGGTTTAATGCCACCTCGTCGGCAAAAATAACCAGGACGACAC  
AAACGAGACGTGGGTTTCAATCAGAGACTGGCTGGATTTCGCAAAACAGATGCTCCGTCGTTTATGTGGCA  
CTGGGTAGCGAAGTAGCACTGAGTCAAGAACAACCTCAGTGAGTTAGCTCTAGGTCTAGAGCTATCCGGTT  
TACCCTTCTTTTGGGCCCTAAGGATACCGCGGTCCAACCCGGTCGATCTTCCCGATGGGTTTCGAGGAGAG  
AATGAAATCGAAAAGGCAAGGAATGGTCTGGAAGGCTTGGGTACCTCAGGTGAAGATACTGAGTCATGAC  
TCGGTGGGTGGGTTTTTGACACACTGCGGTTGGAGTTCATAATAGAGGGGCTGATGTTTGGGAAACCGC  
TTATTATGCTGCCATTTTTGGTGGATCAAGGGTTGAATGCTAGGCTACTGGCGGCGAAAGAGCGGGCGT  
GGAGGTTGACCGAGACGAAGAAAGCGGCGGTTTACGAAGGAAACGGTGGCCGAGGCGTTGAGGTTGGTG  
ATGGTGAAAGCGAGAGGGGAAAGTTTTGAACAGAGGAAAGCCAAAGAAATGGGTGTCGTTTTCGGTG  
ACAAGGATTTGCATGATCTGTACCTGGAAAACTTGGTGGTGTATTTTGAAGACCATAGACGTTTGTGAA  
GGAAAGTTGA

>GWHPAAAL007798

ATGGCGAGCCAAAAGAACGACAACGGAGCTCACGTACTGGCCATCCCATGGCCGGCCCCGGGTCACATGA  
ACCCACTCCTCCAATTCTGCAAGCGTCTCGTCTTCCGAGGAGGCATCAAGGCCACTTTCGCCATCACAA  
GTTCCAATCCAAGTCCATGCACTCCCGCCTCGACTCCATTGATCGACACCATCTCCGACGGATACGAC  
GACGGCGGTTTCTTCATCACCGCTGGCATCCAGGAATCCGTCGAGCAATTCAAGGCCGTCGGATCCAAAT  
CCCTCGCCGAGCTCATCAAGAAACACGAGTCCATGGGCCAACCTTCGACTGCATAATCTACGACGCCTT  
CGTGCCCTGGGTTCTGGAGGTGGCCAAAGAACACGGCATAGCTGGGGCGGCGTTTTTCACACAAACCAGC  
GCCGTGAATTGCGTGAATATCACGTTTATCACAATTGATACCCTACCCGTTGACTCGCCACCTTATT  
CTCTTCCGGCTTGCCGCCGCTTGGGTGCAGGACATGCCCGGTTTCATGACTGTGGATCCATATGTATA  
TGAGCTTGTGTTGAGTCAATTTCTACCCCTCAACAAGCGGATTATCTCTTTGTCAACACTTCTATCAC  
TTGGAAGCAGAGGCAGTGAAGCAATGTTGAAGGTACATCCATTGCTGAAGACAATTGGACCAACAGTTC  
CATCATACTACCTGGACAACCGAATCGAGAACGACAAAAGTTACGGTCTCCACGCCACCCACTTGATGTT  
CAAAGAGAAGAATTCTCCCAAACCGACCCTTCCCTCGTCTCGATTGGCTAAACACCAAGCCCCACGCC  
TCCGTCGTCTATGTATCGTTCGGCAGCATCGATTGGCCAGTCCCAGCACCGACGAAATGAAGGAAATCG  
CCTGGGGTTTGAAGAACACCGGCTGCTATTTCTCTGGGTGGTGAAGGCCAACGAAGAGCCGAACCTCCC  
AAAAAATTACAGGAAGCGACGAGGGAGAAAGGGCTGATCGTGTCTGGAGCCCGCAATTGGAGGTCCTG  
GAACACGAGGCGTTGGGATGCTTCGTACCCACTGCGGCTGGAATTGACGATTGAGGCGCTGTGCCTGG  
GAGTGCCGATGGTGGCGATGCCGAAATGGGCGGATCAGCCGACGAACGGGAAGTATGTTTCAGGACGTGTG  
GAAGATTGGGGAGAGAGTGAAGGTGGATGAAAATGGGGTCGCCGAAAAGAAGAGGTGGAGAGGTGTATA  
CGGGCGGTAATGGAGGGAGAGAGCGGGAAGGAGTTCAAGAAGAATGCTGCGAAATGGAAGGAGTTGGCTA  
AGGAAGCGGTCAATGAGGGTGGGACTCAGGATAAGAACATTGACGAATTTGCTTCCAAATTGATAAGCTC  
TCCCCACCGATCTTGA

>GWHPAAAL007799

ATGGCAACGCAAAACGAAAGAATACGGAGCTCACGTATTGGCCATCCCATGGCCAGCACCAGGTCACATGA  
ACCTCTGCTTCAACTATGCAAACGCCTCGTATTGAAGGGTGGGATCAAAGCCACTTTCGCCATCACAA  
ATTCCAATCGAAGTCGATGTACTCAACCTCGACTACATCCAAGTAGACACAATCTCCGACGGCTACGAC  
GAAGGCGGCTTCTTCATCGTCGATGGCATCACCGCCTCCGTCGAAAAATTCAAGGCCGCCGGATCTGAAT

CCTTGCCGAGCTCATCAGGAAGCACGAGGGATTAGGGCAACCCTTCGATTGCATCATCTACGATGCGTT  
CTTGCCGTGGGTTCTGGATGTGGCCGGTGAATTTGGAATCTCTACGGCGGCGTTTTTCACGCAGAAATGT  
TCTGTGAACTGCATCAACCACCATGTCTTAAAGAAATTGATTCCGTACCCTTTCACGTGCGAACCAATTT  
CGATTCCCGGTTTGCCTCTTTTGAATATTGAGGACATGCCCGATTACATACATGTGGATCCGGAGTTGTA  
TGAGCTGGTGCAGAGTCAATTCTCCACGCCTGAGCTAGCTGATTATCGACTTGTGAACACATTCTACGAG  
TTGGAGTCTGAGGCGGTGGAAGCAATGTCAAAGATCCATTCCCTGAGAACAAATCGGACCAACAATTCCT  
CTTTCTACCTAGACAAGAGAATCGAAAACGACAGCAGCTACGGCCTCCACGCCACTCACTTGATGTTCCA  
AGAGAAAAACGCTCCCGTGTAGAGCCTTCTGTGGTCCTAAACTGGCTAGACGCGAAACCCACTGGCTCA  
GTTGTGTACGTGTCCTTTGGCAGCGTCTCTATAGCCAGTCCAGGACCCGATGAAATGAAGGAAATCGCGT  
TCGGCTTAAAAACACCAATTTTCACTTCTTATGGGTGCGTAAGCCCAACGAAGAGCCGAATCTCCCTGA  
AAATTTCAAGGAAGAGATGGCCGATAAAGGGTTGATTGTGTGCGTGGAGTCCCCAGTTGGAAGTATTGGCA  
CACAAGGCTCTCGGTTGTTTTGTCACCTATTGTGGGTGGAATTCAACTATTGAGTCGCTGTGTATGGGAG  
TTCCGATGGTGGCAGTGCCCAAATGGGCTGATCAACCTACGAACGCCAAGTATGTGGAGGATGTTTGAA  
AGTGGGGATAAGGGTGAAGGTGGACGAGAATAGTTTTCGGGAAGAGATGAGGTGGAGAGGTGATTAGA  
GCGGTGATGGAGGGGGAGAGGGCGGAGGATTTGAAGAGAAGCGCTCTCAAATGGAAGGAGTTGTGTATAA  
AAGCGGTGCTGAGGGTGGGAGTTCGGACAAAAACATGGAGGAGTTTGCCTCTGAATTGATTACGAGAAA  
AAGTGCCAGCAAATAG

>GWHPAAAL007800

ATGGAGGAGAAGCAAGGAACGTGCGACAGAGTTCACGTTCTGGTCGTCCCTTTCCCGGTACAGGGTCACA  
TCAATCCCATGCTTCAATTCGCCAAACGCTTGGCCTCCAGCGGCCTCAAATCACCGTAATCGGCACCAC  
CAAAACCACCGTCAGCCGCTCCATTCCAAACATTGAGATTGAGCGAATCCCCGACGCTCCTGGAGAAGCA  
GCGGATCAACAAAACACGGAGACCATCGAAGAACACTGCGAACGACTCACGACGGTGCTCTCGAACTTCT  
CCGTGAAACTTATCGAGAAACAGAGCGGCCTCGGCTGCCCTTACCGCGTCCTTGTGTACGACTCGGTTAT  
GCCGTGGGCGTGAGGTTGGCGCACCGGCGGGGCTTAAAGGCGGCGCCTTTTTTCACCCAGTCGTGCTCT  
GTTTCTGCTCTGTACTACCATATGAATCGTGGGTGCTGAAGGTTCCACCGGTAGGGTCGTGCGAGTTG  
TGGAGGTGCCTGCGCTACCGCCGTTGAAGGTGCGTGATCTGCCGTGCTTTATCTATGACATGGGCTCGTA  
CCCCTTTATACTGAAAATGGTGGTCAATCAGTTCCTGAATTTTGAGAAAGCGGATTGCCTGTTGTTTAA  
ACTTTTGACAAGCTGGAACCTGAGATGGTGACTTGGATGGCAAACCAAGTGTCCAACGATCAGGACAATCG  
GACCAACTCTTCCGTCGGTGTACTTAGACAAACGATTGAACGAAGACACGGATTACGGACTCAGTCTCTT  
CAACCCAGACCGGAATCCAGCATCCAATGGCTCCACTCCAAACCCACCGCTTCCGTCGTCTACGTCTCC  
TTCGGTAGCCTCGCCAACCTTTCAGAAACCCAAATGCATGAGCTAGCGTTCCGGCTCGAAAGAACGGACT  
CTCACTTCTCTGGGTTTGGACTGATCAGACGACGAATGCCATGTTAGCGGTAGAGGTTTGGGGAGTGGG  
GGTACGGACGGCGGCGGACAAGAAGGGAATTGTGAGGAGAGAAGAAGTGGAGATGCGCGTGAGGGAAGTG  
ATGGAGGGGAATGGGAGAGAGGGGTTGAAGAGTAATGCTGGGAGATGGAAGGAGTTGGCTAGGGAGGCTA  
TGGACGGAGGTGGTAGCTCCGATGTGAATATTCAGGACTTTGTTACAAGCCTTGCATGCAACTAA

>GWHPAAAL007936

ATGGCCGAAAATACTCACGTCGTGATGCTTCCATGGTCGGCGTTCGGTCACATTATCCCCTTCTTCCATC  
TCTCCATAGCCTTATCTAAAGCCGGAATCCACGTGTCTTTCGTCTCCACACCGAAAAACATCCGGAGACT  
CCCCCAAATACCGCCGGATTCCGTTCTTTTATTGACATCGTGGAGCTCCCGTTGCCGGAGATCGACCGG  
AGTCTCTTGCCGGAAGATGCAGAAGCCACCGTCGACATTCCCACTGAAAATATTAGTACCTTAAGATAG  
CTTACGACCTCTTAAAAAACCTTCAGTCGGTTTCGTTGCCGACCGGTGCGCGGACTGGATCGTCATCGA  
CCTGATGCCTTACTGGGCCGCCGACGTTGCCAAGGAGTTCGACATTCCTGTCACTTACTTCAGCATGTTT  
TGCGCCGCCGCTTCCGATCTTCTCTCGGCCGAATTTATCGCTGGCGAAGGTCAGAAAATGAAACGTT  
CGACTCCGGAATCCCTGACTTCGACTCCGAGGGGGTCGATTTCCCGTCAACGGTTGCTCATCGGCATCA

TGAACCGCTGTCTTTCCACGGAGAAAACGCCTCCGGCATCAGTGACGCCAGCCGCTTTGCCAGAACTC  
CATTTCATGTAGAGCCCTGGCCATTTCGCAGTTGCCCCGAGTTTGAACACGATGACTTGAATCTACTTGAGA  
AAATCCATCAAAAATCGGTGATTCCCGTCGGACTTCTCCTGCCGGAACAAAATCGGAAGCTAGAAACTC  
CGGCGATGAATTCAAAATCTTCAAATGGCTTGATCAACAAAAACCCAAATCAGTTATCTTCGTCGGATTTC  
GGAAGCGAATGCAAACTAACCGAAAATCAAATTCACGAAATAGCTTACGGTCTGGAGCTGTCCGAACCTCC  
CATTTCATGGTCGCTCAGAAAACCAAGCTATTCAACCGACGAGGTCGACCCCTCTCCGCCGGATTTC  
CCGCCGCATCGCCGAAAAAGGACTAGTACACGTGCGATGGGCGCCGACGAGAGATTTCGCCACCCCA  
TCCGTCGGAGGCTCTCTGTTTCACTCCGGCTGGGGATCGGTGATCGAGACTCTGCAATTGGGACACCGTC  
TCGTCGTCTTGCCGTTGATTATCGATCAGCCGTTGAACGCGAGGTTGCTGGTGGAGAAGGGTTTGGCGAC  
AGAAGTGGAGCGAGGCGGAGATGGTTCGTTTGAAGGGACGCCATAGCTAAAGCTCTGAGAGAAGCCATG  
GTTATGGAAGGAGGAGAGAGAGTGAGAGAAGCCATGGAGATATTCGGAGATCGGAAGTTGCAAGAGA  
ACTACGTGGAGAGATTTGCCGAATACCTGAAAAATGGAGTGGCGAAAAAGAATCAGTAA

>GWHPAAAL007941

ATGGCCAAAAATACTCATGTCGTGATGCTTCCATGGTCGGCGTTCGGTCACATTATCCCCTTCTTCCAGC  
TCTCCATAGCCTTAACTAAAGCCGGAATCCATGTGTCTTCGTCTCCACACCGAAAAACATCCGGCGACT  
CCCCCAAATACCGTCGGATTCCGTTTCCTTTCATTGATTGGTGGAGCTCCCGTTGCCGAGATCGACCGG  
AGTCTCTTGCCGGCAGATGCAGAGGCCACCGTCGACATACCCACTGAAAAATATTCAGTACCTTAAGATTG  
CTTACGACCTCTTGAAAAAACCTTCAGTCGGTTCGTCGCCGACCGGTTGCCGGACTGGATCGTCATCGA  
CATGATGCCTCACTGGGCCGTCGACGTGGCCAAAGAGTTCGACGTTCCGGTCATTTACTTCAGCGTGTTT  
GGCGCCGCCGCTGCCGATTCTGGGGGCCGCGGAGTATATCGCTGGCGAAGGTCAGAAAATGAAACGTT  
CGACCCCGGAATCCCTGACTTCGACTCCGGAGTGGGTCGATTTCCCATCGACGGTTGCTTATGGGCATAA  
CGAAGCGGTGTCTTTCCACGCTGGAGCCTACGGAGAAAACGCCTCCGGCATCAGTGACGCCGGCCGCTACT  
GCCAGAATACTCCATTATGTAGAGCCCTGGCCATTTCGCAGTTGCCCCGAGTTTGAACACGATTACTTGA  
ATCTACTCGAGAAAATCCTTCAAAAACCGGTGATTCCCGTCGGACTACTCCCGCCGGAACAAAATCGGA  
ACCTAGAACTCCGGCTATGAATTCAAAATCTTCAAATGGCTTGATCAACAAAAACCCAAATCGGTTATC  
TTCGTCGGATTTCGGAAGCGAATGCAAACTAACCGAAAATCAAATTCACGAAATAGCTTACGGTCTGGAGC  
TGTCGGAACCTCCATTTCTATGGTCGCTCAGAAAACCAAGCTATTCAACCGACCCCTCTCCGCCGGATTT  
CCACCGCCGCATCGCCGAAAAAGGACTAGTACACATTGGATGGGCGCCGACGAGAGATTTCGCCAC  
CCATCCGTCGGCGGCTCTCTGTTTCACTCTGGCTGGGGTCCGTGATCGAGACTCTGCAATTTGGACACC  
GTCTCATCGTCTCGCCGTTGATTATCGATCAGCCGTTGAACGCGAGGTTGCTGGTGGAGAAGGGTTTGGC  
GAGAGAAGTGGAGAGAGGCGGAGATGGGTCGTTTGAAGGGACGCCATAGCTAGAGCTCTGAGAGAAGCA  
ATGGTTATGGAAGGAGGAGAGAGAGTGAGAGAAGCCATGGCGATATTCGGAGATCGGAAGTTGCAGGAGA  
ACTATGTGGAGAGATTTGCCGAATACCTGAAAAATGGGGTGGCAAAAGAGAATTAA

>GWHPAAAL008406

ATGGGTGATGATCCCATGTTCTTGTCGTACCTTATCCAGCACAAAGGCCATGTAATTCCTCTAATGGAGC  
TCGCCATTGCTTAGCTCAGCATGAGATCCGGGTCACGTTTCGTGAACTCGTACTTCACTCAGGAGCGAGT  
GACGGAATCGTCGCCGAGAAAAATGGGTTTCGGAGAGGATTTCGATTTCGCCTGGTGTCAATCTCCGACGGG  
TTGGACCCGTCGGAGGATCGGAACGAACTGGGGAATTTGTCCGAATCGATTTTTCGGGTGATGCCGAGA  
AACTGGAGGAGCTGATTAAGGAGATCAATGGATCGGAGGGCGACCAGGTAGCGTGTGTTATTGCGGATAT  
CAGTATGGGGTGGGTGATGGACGTGGCGGCGAAGATGGGGATCCGGCGGGCGGCGTTTGGTCCGACGTGC  
GCGCGATATTGGGATTGATTCACGATGTGCCAAGCTAATGGAGGATGGGATTATAAACGACGACGGAA  
CTCCGACTAAGAACGACGTGATTAAGCTATCACCGACATGCCCGCCATGAACACAGCCGACTTCCCTTG  
GGCTGCATTGGCGATTTGGCCACCCAGAAGAAGATTTTCGACATCATGTTAGCAGGTCGCCGCGCTCTG  
GATCTCGCCGACCGGATCATTGCAACTCGTCTTCCGGTTTGGAGCCCGCGCTCTTCGATCAGTACCCAC

AATTCTCCCCGTCGGCCCACTCCTCCGTAGCTCCGGCGGAACTTCTGGCCGGAAGATTCCACCTGCCT  
GGACTGGCTAGACCAACAACCCCCAAATCCGTCATCTACGTCGCGTTCGGAAGCTTCACCGTTTTCGAC  
CCAACCCAGTAG

>GWHPAAAL008407

ATGGGTAATCCCCATGTTCTTGTCTCCCTTATCCAGCACAAGGCCATGTAATTCCTCTAATGGAGCTTG  
CCCATTCTTGGCTCAGCATGAGTTCCGGGTCACGTTTCGTGAACCTCGGATTTTACCCAGGACCGAGTGAC  
GGGATCATCGCCGGAGAAAAATGGGTTTCGGAGAGGATTCGATACGCCTGGTGTCTCGATCTCCGACGGGTTG  
GAGCCGTCAGAGGATCGGAACGAACTGGGGAACCTAACGGAATCGATTTTCCGGGTGATGCCGGCGAAAC  
TGGAGGAGCTGATTATGGAGATCAATGGGTCTGACGGCGACGAGGTGGCGTGTGTTATTGCGGATATCAG  
TATGGCGTGGGTGATGGAAGTGGCGGGAAGATGGGGATCCGGCGGGCGGCGTTTTGTCCGATGTCCGGC  
GCGATGCTGGGATTGGTTTACAATGTGCCTAAGCTAATGGAGGATGGGATTATAAACGACGACGGAACCTC  
CGACGAAGAACGAGGTGATTAAGTTAACGCCGACATGCCCGCCATGAACACGGCCAACCTCCCGTGGGC  
CTGTATCGGAGATTTGGCCACCCAGAAGAAGATTTTCGACGTCACGTTAACAGGTCGCCCCGCTCTGGAT  
CTCGCCGACCGGATCATTTGCAACTCGTCTTCCGGTTTGGAGCCCGCGTCTTCGATCAGTACCCACAAT  
TCCTCCCCGTCGGCCCACTCCTCCGCAGCTCCGGCGGAACTTCTGGCAGGAAGATTCCACCTGCCTCGA  
CTGGCTCGACCAACAACCGCCCAATCCGTCATCTACGTCGCGTTCGGAAGCTTCACCGTTTTCGACCCA  
ACCCAGTTCGGTGAACCTAGCCAAAGGGCTAGAACTCACTGACCGGCCGTTCCTTTGGGTTGTCGGCGGG  
ACTCCGCCGTCAAATACCCGGAAGGGTTTGAGAAGATAATCGGTACCGGTCGGCGGGGGAATAAGTAGA  
GTGGGCTCCACAGAAGAAGGTATTAAGCCATCCTTCGGTGGGGTGTCTTCTGAGCCACTGCGGTTGGAAC  
TCTACAGTTGAAGCAGTTAGCAATGGGGTCCCACTTTTATGTTGGCCCTACTTTGCTGATCAGTCCTTCA  
ACCAAAGCTATATTTGTGATGTTTGAAAGTTGGATTAGGGTTTGAAAAAGACGAAAATGGCCTTATAAT  
TTTTGAAGAAATTAAGAAAAAGTGGATGAAATTTTGGTGACGAGAATTATAGAGAGAGGGCTTTGGAT  
TTGAAACAAAAAGTCATGGATGGTGTTAAAGAAGGTGGGTGCTCCAATAGAAATTTTAGCAAAATTATGG  
GGTGGATTACGCAATAAATAATGGTTTGCTTCGTGA

>GWHPAAAL008878

ATGGCTTCCCCATCGCCTCACTTCGTGCTGCTTCCCTTTTTGGCTCAAGGCCACCTTATTCCTATGATAG  
ACATTTCCAGATTGCTAGCAAAACCGGAGTAGTAGTGACCATAATCACTACTCCCTAAATGCCAAGAG  
ATTGCAAGAATCATCACCCGGGAAATAGATTCCGGCCTCCAAATCCGAGTAGTCCAACTCCACTTCCCT  
TGCGTGGAAGCCGGTTTGCCCCAAGGGTGCAGAAATTCGACCACTTGACCACAATGGCTTCCGCTGGAC  
AATCTTGGAGGCAACTCGAATGCTTCAAAGCCAGTGGAAGATCTCTTCAAGGGTTAAGCCCGCCCCC  
AACTTGCTTGCTGTCCGACATGTGTTACCCATGGACTACCCTTGTGCGGAGAAGTTTTCCGTTCCGAAG  
CTTGTTTTCCACGAATGTGTTGTTTTCCCTCTTTGCAATCATGTTTTGTACACGTCGAGGGTTTTCG  
ACACAGTCGCCTCAGAAACCGAGCCTTTTGCAGTGCCCGGCATGCCTGATCATATCGAATTGACGAAAAC  
TCAAGTTCCGACATTGGTCAACATGAATACATCGTCGGGGGTAAAAGACGTGCGGAAAGAGATCAAGGAA  
GGAGAGCTGTACGCTATGGCGTCGTGGTCAACACTTTCGAGGAGATGGAGGAGAAGTACGTGAAGGAAT  
ACGCAAAGGCGATGGGGAAGAAAGTTTGGTGCATTGGGCCGTTTCATTGTGCAATAAGAACAACCTTGA  
CAAGGCCGACAGAGGGAACAAGGCCTCCATCGACGAGCACCCTGCTTGAAGTGGCTGCACTCTTGGGAA  
CAAGGCTCGGTGGTATACGTTTGCCTCGGGAGCCTAACTGCCTAGCAACCTCACAATGATAGAGCTCG  
GGCTTGGGCTAGAGGCATCGAATAGGCCATTTCGTATGGGTCATAAGGTATGAAATCGTTGAATTTGAGAA  
ATGGATTTTGGAAGAAGGGTATGGGGAGAGGATTAAGGGAAGAGGGCTTTTAATCCACGGGTGGGCCCCA  
CAAGTGTGATATTATCGCACCGGGCGATCGGAGGGTTCTGACGCACTGCGGGTGGAATTCACAATGG  
AAGGGATATGCGCGGGGGTTCCAATGCTGACGTGGCCGATATTGCGAGAGCAATTTGTTAACGAGAAGTT  
GGTCGTGCATGTACTGAAGACTGCTGTGAGCGTCGGCGTGAAAATTCAAATCTATCCTGGGAACGAAGAG  
GAGGTCGGCATTTTGTTGAGGAGGGAAGACGTCAAGATGGGTATAGATAAGGTGATGGAGGAAAAAGAAG

AAGGGGAAGAGAGGAGGAGGAGAGCCAGGAAGTTTGGGGAGATGGCAAAATGGGCGATAGAAGAAGGGGG  
TTCTTCACACCACAATTTAACCATGTTAATTCAAGATGTCATGGAGAAATCAAATCAACTTCGAAAAGAT  
GGGTGA

>GWHPAAAL008879

ATGGCTTCCCCATCACCTCACTTCGTTGTGCTACCCTTTTGGCTCAAGGCCACCTTATCCCATGATAG  
ACATTTCCAGATTGCTAGCAAAACGCGGAGTAGTAGTGACCATAATCACTACTCCGCTAAATGCTAAGAG  
ATTCTGAAGGAATCATCGCCCGGCAATAGATTCCGGCCTTCAAATCCGAGTAGTCCAACCTCACTTCCCT  
TGCGTGGAAGCCGGTTTACCCCAAGGGTGCGAGAATTTGACCACCTTGATCTCAATGGCTTCCGCTGGAC  
AATTCTTTGAAGCAACTCGAATGCTTCAAAAACCTGTGGAAGATCTCTTCGAAGGGTTAAACCCGCCCCC  
AGCTTGCTTGCTGTCGACATGTGTTACCCATGGACAACCCTTGTGCGGAAAAGTTTTCTGTTCCGAAG  
CTTGTTTTCCACGGAATGTGTTGTTTTCCCTCTTTTGCACCTCACGTTTTGCAAACGTCGAGGGTTTTTG  
ACACAGTCTCCTCAGAAATCGAGCCTTTTGGGTGCCTGGCATGCCTGATTTTGTGAATTGACGAAAAA  
TCAAGTTCCGGCATTTCGTCAACATGAATATACCGTCGGGGCAAAAAGACGTGCGGAAAGAGATCAAGGAA  
GGGAGCTGTGCGCATATGGCGTCGTGGTCAATACTTTCGAGGCGATGGAGGAGAAGTACGTGAAGGAAT  
ACGCCAGGGCAATGGGAAGAAAGTTTGGTGTATTGGGCCGGTTTCATTGTGCAACAACAACAACTTGGA  
CAAGGCCGACAGAGGGAACAAGGCCTCGATCGACGAGCACCATTGCTTGAAGTGCTCGACCATTGGGAA  
CAAGGTTCCGTGATATACGTTTGCCTTGGGAGCCTAACTCGGCTAGCAACTTCACAAATGATAGAGCTCG  
GGCTAGGGCTAGAGGCATCAAATAGGCCCTTTGTATGGGTATACGGTATGAAATCGTTGAATTTGAGAA  
ATGGATTTTGGTAGAAGGGTTTGGAGAGAGGATTAAGGAAAGAGGGCTTTTAATCCGTGGGTGGGCCCCA  
CAAGTGTTGATATTATCGCATCGGGCGATCGGAGGGTTCCTGACCCACTGCGGGTGGAATTCACGATGG  
AAGGAATATGCGCGGGTGTTCGAATGCTGGCGTGGCCGATGTTTCGAGAGCAATTTGTGAACGAGAAGTT  
AGTCGTGCATGTGCTGAAGACTGCTGTGAGCATCGGTGCGAAAATTCAAATCAGTATTGGGAAGGAAGAG  
GAGATCGGCATTTTGGTGAGGAGGGAGGACGTCAAGATGGGTGTAGATAAGGTAATGGAGGAAAACGAGG  
AAGGGGAAGAGAGAAAGAGGAGAGCCAGGAAGTTTGGGGAGATGGCAAAGTGGGCAATAGAAGAAGGAGG  
TTCTTCACACAACAGTTTACTATGTTAATTCAAGATGTCGTGGAGAAATCAAATCAACTTAGGAAACAT  
GGGTGA

>GWHPAAAL009069

ATGGCTTATCCTCCACCTTCTCCCGCACTGCACATTGCTCTCTTCCCCTTCATGTCCAAAGGCCACACCA  
TTCCGATCATCCACCTAACAAGACTCCTCCTGAACCGCGGCCATAAAACCACCGTTTTTACCACCCCAGC  
AAACCGCCCCCTTCATCTCTGACTCCCTCACCGGCACCGACGCCTCCGTCATTGTTCTCCCCTTCCCGGAA  
AACATCCCAGGAATACCGTCCGGCACCGAAAGCACCGACAACTACCGTCAATGTCCCTCTTCGTCCAGT  
TCGCCAACGCCACAAAACCTCATCCAACCTCACTTCGAGCAAGCCATCAAGTCACTCCCCAACCTCAACTG  
CATGATATCCGATGGCTTCCTCAGCTGGACCCTCCAATCGGCATCTAAATTCGGCATCCCAAGGCTAGTC  
TTCTACGGTATGAACAACCTACTCCATGGCACTAACTACGACGTGACCGTCAATAGGCTCCTCTCGATAC  
CCAAATCGGACAACGAGCCATTTCGTGTCCTTAACCTTCCCCTGGATCAAACTCACCAAGAATGACTTCGA  
AGAGCCCTTTAACGAGGTTGAACCAAAGGGACCTTATGTGGAATTCACCATCGAACAGAGTCTAGCCACG  
TTTAATAGCTACGGTCTGATCGTGAACAGCTTCTTCGAGCTCGAGAAGCCGTTCGTGGAGTACTGGAATC  
GCGCGAGCAAACCGAAAGCTTGGTGCATTGGGCCTCTCTGTTTCGAGAACCAGGAAATGATCATCGAAAG  
AAAGCGCAAACCAAAGCCCAAGTGGATCGATTGGCTGGACCAAAGCGAGACCAGGGAAAAATCCGTTCTG  
TACGTTGCGTTTGGGTCTCAGGCGGAAATTTACAGAAGCAGCTGCATGAAATAGCAATGGGGTTAGAGA  
AATCGGAGGTGAACCTTTCTATGGGTGATGAGAAAGAAAGACACGGCCATTGAGGGAGTGCCGGAGAGAGG  
AATGGTAGTGAGAGACTGGGTGATCAGAGGGAGGTGTTGGCACACGAGGGGTGCGGGGGTTTCTGACG  
CACTGCGGTTGGAACCTCGGTGTTGGAGAGCATATGGGCAAGGGTTCGATACTGGCGTGGCCGATGATAG  
CGGAGCAGCACCTGAACGCGAGGATGGTGGTGGAGGAGATCAAAATCGGATTAAGAGTGGAGACGATTGA



CGGCTCTGTAAGAGGGTTTGTGAAGAGGGAAAGCTTGGAGAAGATGGTGAGGGAGCTGATGGAGGGGGAT  
ATGGGGAAGGAGGTGAGGAAGAAGGTGGAGGAGGTGGGAGTGGCGGCCGAAAAGCAATGGCAGAGGGTG  
GGTCTCTTGGGATGCTCTGAATCAGTTTATTGATGAGATCAAAGCACAGGGATCTAATCCAATCAATTG  
A

>GWHPAAAL009324

ATGGATCGATCCGCAAGCTCAAAGCTTACATTGCCATGTTTCCATGGTTCGCCGTCGGACATTTAACGC  
CGTTTCTCCATCTCTCCAACGAGATAGCTCAGAGAGGCCATAAAATCTCCTACTTATTACCCAGAAAAGC  
TCATATTAGTTGCAGAGCCAGAATCAACACCCGGATCTGATCACATTCTATCCGCTCGCCGTCCCTCCG  
GTCGCCGTCTTCCCTCCGGCACCGAGACGGCTCCGATATACCCATTTCCAGACCGGCCTCCTCGCCA  
CCGCCATGGACCACATGCGCGGCGAGGTGGAAGAAATTTTTCGTTCTCTCAGGCCTGATTTCTGTGTTCTA  
CGACCTTGCTCACTGGATCACAGAGCTCGGATCGAGTATCGGGTTCAAAACCGTGTGCTACATGTGTT  
TCCGCCGCCTCGCTGGCGATCGCGCTGGTTCCGGCGCGTGTGGTTCCCAAGGACCGTAAGGTAACGGTGG  
ACGAACTGGCGGTGCGCGCAAGGGATACCCATCTTCTCCGTGGTGCTCCGCCCCACGAGGCCCGCTC  
CCTGCTCTTCATCTCGTCGGAGTTCGGCGCCGGGGAGTCACGTTCTACGAGCGAGTCATCGCCGCCATG  
AAAACTGCGATGCGATTGGAATCAGAACCTGCCGCAAAACCGAAGGCTCCCTCTGCGACTACATGGGAA  
CCAGTACAACAAACCGTGCTCCTCACTGGACCATCTTGCCGGAACCGTCCAAAGCTCAACTCGACGA  
CCGGTGGTCCGATTGGCTCAACAAATCCCCCGAAATCCGTCATCCTCTGCACATTGGAAGCCAAATC  
GTCTCGAAAAAGGCCAATTCCATGAACTCGTCTTGGGCCTCGAATCAACAGCACTACCATTCTGGCCG  
CAGTAAGAACTCCGCAGGAGAAGAAGCCCTGCCGGAGGGATTGCAAAACCGGGTAGGCGAAAGAGGGGT  
GGTTTACGGCGGTTGGGTGCAGCAGCCATTGATATTGAACCACCCATCAGTCGGGTGCTTCGTCAGTCAC  
TGTGGGTTCGGATCGATGTGGGAGTCTCTGATGAGCGATTGTCAGATAGTGGTGGTTCCGCATTTGGGTG  
ATCAGATATTGAACGCGCGGCTGCTGGCGGAGGAGATGAAGGTGGCGGTGGAGGTGGAGAGAGATGAAAA  
GGGTGGTTTTCTAGAGAGAGATTGGCGGAGCGATCAAGACGGTGATGGAGAGAGAGAGTGAGGCGGGA  
GAGGTGGTGAGGAAGAACCATGCGAAGTGAAGGAGATAATGGTAAAACAGGGTTTATGAGTAATTACG  
TGGAGAATTTCATAGAGAACTTCACGAGCTATAA

>GWHPAAAL009436

ATGGGCTCGATTCCAGCCAGCGACAAGCCCCACGCCGTGTGCATACCGTACCCGGCACAGGGCCACATAA  
ACCCAATGCTCAAAGTTAGCAAAGATCCTCCATAGCCGAGGCTTCCACATCACCTTCGTCAACACCCACTT  
CAACCGCAACCGCCTCCTCCATTCCCGTGGGCCCTCCGCCCTAGACGGCCTGCCCGACTTCCGATTTGAC  
TCCATCCCCGATGGCCTCCCGCGTCTGACGCCGACGCCACCCAGGACATCCCTTCGCTATGCGAGTCCA  
CGCCGAAGCACTGTCTCGAACCTTCTGCGACCTCATCGCCAGAACCAATGAAGATGCTGGAGTACCTCC  
GGTAAGCTGTATCGTCTCCGATGGGTGATGAGTTTACGCTGAAGCGCGGAGAGGTTTGGGTTACCG  
GAAGTGCTGTTCTGGACAACGAGCGCGTGTGGGCTGTTGGGTATACACAATATCACAAGCTCGTTGAAA  
GAGGATATACCCCACTCAAAGATGTGAGTTACGTGACAAATGGGTATATGGAACAACAATGGATTGGAT  
TGCCGGAATGAAAGACATCCGGTTAAGGGATCTACCCAGTTTATTCGGACCACCGACCCGAAAGACACC  
ATGCTCAATTTCTCATCAGCGAATGCGCGCCATCCCCACCGCTCCGCCCTGATCCTCAACACCTTCG  
ACGCCTTGAAACGCGAATCCGTCGACGCCCTCTCCGCCATCACCCCGGATCTACACCGTCGGCCCTCT  
CAACCTGATGCTCAATCAGATTAACGACGACCGGATCAAGTCAATCGGGTCAATCTCTGGAAAGAGGAT  
CCGGGCTGCATCGAGTGGCTGGATTGGAAGGAACCCGGGTCGGTTGTGTACGTCAATTTCCGTAGCATCA  
CCGTGGTGACGGCGGGTCAGCTCACTGAGTTCGCCTGGGGACTCGCCAACAGCGGCCGGCCCTTCCTATG  
GATAGTCCGACCCGACATAGTTGCCGGCGATAAGGCGATGATTCCGCCGGAATTTCTGGCGGAGACGGAA  
GGGAGGGGGAGGCTGTCAAGCTGGTGCCCGCAGGAGCAGGTGCTGAGGCATCCGGCGGTGGGTGGGTTCT  
TAACCCACAGCGGGTGGAATCCACCGTGAGAGTCTATGCAGCGCGTTCCGGTGATCTGCTGGCCCTT  
CTTGCAGAACAGCAGACGAACTGCCGTTACAGCTGTAGGAATGGGGGTGGGGATGGAGATAGATAAT

AAT

>GWHPAAAL010110

ATGGGGGAGAAGCAACCGGAGCTCCAAAAGCAACAGCGACAGGGGCTCCGATTGGTGCTCTTCCCACTTC  
CATTCAAAGGCCACATCAACCCCATGCTTCAGCTCGCCGCCATTCTTCACGCCAATGGCTTCCCCATCTC  
CATACTCCACACTACCTTCAACTCTCCCACCCCTTCCGACCACCCTCACTTCGACTTCACCCAATCTCC  
GTCGACGGTCTGTGCGAAACAGATTCTCCGACGCCGGATCTGGTTGATCTCCTCGAACTACTCAACCAAC  
GATGCGCGGCGCCGTTCCGCGATTGCCTGGAGAAGTTGACATCGGAGGAGCCCGTCGCCTGTTTGATCTC  
GGACGCCATTCTGCATTGCACCGCCACCGTCGCTGACAGTCTTCGTATTCCAAGGATCGTACTGAGGACC  
GGCGGGGTCGCCTCCTTTCTTGCGTTTGCTCCTTTTCCACTTCTTCTGGATAAGGGTTATCTTCCCATT  
AGAATCGAGGCTTGAAGAGGCAGTTCAGAGCTTCTCCACTGAGAATCAAAGATCTTCCGGTGATCAA  
TACCGGCAAACCGGAGGCCCTATATCATCTTCTAGCAGAGATGATCAAGACGGCCAAGAATCCTCAGGC  
CTCATCTGGAACACCTTCGACGAACCTGAACAGCCGGAATTATCCAAACTCCGGCGTGAATCCCCATCC  
CAATCTTCCCAATCGGCCCTTTTCAGAAACACCTCCTCCTAACTTCCACACAGAAGACCGGAGTTCTTC  
CATCTCTTGGCTTCAAAATCAACCCCCAAGCTCCGTCATCTACGTGAGCTTCGGCACCATTGCGTCAATG  
GAGGAATCCCAATTCACGGAGATAGCCCATGGACTCGCCGACAGTCTCCATCCCTTCTGTGGGTGGTCC  
GGCCAGGTCTAATCCGTGGCTCGGAATGGCTCAAGAATTTGCCGGATGGGTCTTGAGAGGCTGGAAGG  
AAGAGGGAAGATCGTGAAGTGGGCTCCACAGGCAGAGGTGTTGGCTCATCCGGCGGTGCGGCGATTCTGG  
ACTCACAGCGGGTGAATTCGACGGTGGAGAGTATCAGCGAAGGAGTTCGATGATATGTATGCCGTGTT  
TCACGGATCAGTTGGTGAATGCCAGGTATGTGAGCCATGTTTGGGGAGTTGGGTGACGTTGGAAGGTGG  
GATTGAGAGGGGGAAGATTGAGAGGTGATGAGGAGAGTATGGGTGAAGAAGGAAAGAGATGAGGAAG  
AGGATTTTGTGTATGAAGGAGAGAGTGAATGTTTGCTTGAGGAAAGGTGGATCCTCCCATCAATCTCTAC  
ACAACCTTGGTAAGTTACATCTCGTCACTCTAG

>GWHPAAAL010292

ATGGAGGATGTCCCTGCCGCAAACCCCATGCGATCCTAGTAGCCTATCCTCTCCAAGGCCATGTAATCC  
CAGCCGTCCATCTCGCCCTCAACCTCGCTTCACGAGGCTTCACGATCACCTTCGTCAACACCCAATCCAT  
CCACCACAGATCACTACCGTCCATCCGGCAAAGCAGCCGCCGCCGCGTTGACGATATCTTCGCCGCC  
ATCCGCGAATCGGGTCTCGACATCCGATACACCACCGTTCCCGACGGGCTTCCGGCGGGGTTCGACCGGT  
CGCTCAACCACGACCAGTTCATGGCGGCGCTGCTCCACGTGTTCTCGGCCACGTAGAGGAGCGGTGGA  
TGAAATCGTGAGGCAGGGCCGCCGTAAGTTGTCTGATCGCCGACAGTTCCTTTGTTGGCCCGGAAAG  
CTGGCGAAGAAGCTTGGGGTTGTGTATGCATCGTTCTGGACGAGCCGGCTTTGGTTTTTACTGTATT  
ATCATCTTGATCTTCTAAGGATACATGGCCACTTCGGTTGTATTGAATTACGAGATGATATAATTGACTA  
CATACCCGGTGTCAAATCCATCGAGCCAAAGGACTTGACATCATACCTTCAACAGTCGGATTCATCGACC  
GTCTGTCAACCAATCATCTGCAATGCATTTAACGATGTCAAGACGGCGGATTCGTCTATGCAACACAG  
TCCAAGAACTGAACCCCAACTATAACCGCCCTACAATCGAAAACCCCATTTTTCGCCATTGGACCCAT  
CTTCCCATCCGGAGGCTTCACCACCAACAACGTGTCCACCAGCTTGTGGTCTGAGTCCGACTGCACCCAT  
TGGCTCGACGCCAAGCCAGATGGTTCGATCTTGTACGTCTCGTTCGGGAGTTATGCCACGTGAAAAAA  
ATGACCTTGTGGAGATCGCAAACGGACTATTGCTCAGCAAAATCGAATTCCTATGGGTTCTACGGCCTGA  
TATAGTCAACTCTGATGATTCCGATCCACTGCCGAGGTACTCAAGGAGGAGATCGGCAACCGTGGAATG  
ATTATACCTTGGTGTAATCAAAGACAGGTCTGGCTCACCGGGCGATCGGAGGGTTTTTAACCTATTGTG  
GCTGGAACCTCAGTACTGGAGAGTGTGTGGTGTCAAATCCCACTTCTTTGTCTGCCTTTGTTGACTGATCA  
ATTACTAATCGGAAATTAGTGGTCGATGATTGGAAGATTGGGACTAATCTATGCGATAAAAGGCCAATC  
ACAAGGGGTGAAGTTTGTGAGAAGATTAAAGAAGTCATGAGTGAGAAATCAGGGAATGAGTTTAGGGAGA  
AGATCAAGGAGGTGAAAAATAAATTGGAGAATGCATTAGGGGGCAAATGGGTCATCCACCAAAAAATATGGA  
TCAATTTATCAAAGATCTAAAGGCCACTATACAAAAGAAACGTGGAGGGACATCCTAA

>GWHPAAAL011043

ATGGAATAACATTGAAAAGCCCCCATGCTATTATGTTCCCATATCCACTCCAAGGTCACCTAATCC  
CCTTCGTCCACCTAGCCATCAAACCTCGCCTCCAACGGCTTCGTGTCACCTTCGTCAACACCCAATCCAT  
CCACCACCAGATATCCCAGTCCGAACCTCCGACGCCGGTGCAGACATCTTCGCCGGAGCTCGCAACTCC  
GGTCTCGACATCCGGTACAAGACAGTGAGCGACGGCCTTCCGGTGGGCTTCGACCGGTCCCTCCACCACG  
ACCAGTTCATGGAGAGCCTTCTGCACATTTCTCGGCCACGTGACGAGCTCGTCGGAGAGATGGTCGC  
GTCCGGAGACCCTCCGGTGAGTTGTTTGGTGGCGGATACTTTCTACGTGTGGCCGTCGACGGTGGCGAAG  
AAATATAATCTCGTTAATGGTTCGTTCTGGACGGAACCGGCTCTGGTCCTAACTCTGTATTATCACCTCG  
ACCTGCTCAGACAAAATGGTCATTTCCGGCACTACTGATAGTTGCAAGGACAACATTGATTACATACCGGG  
GGTCCCATCAATGAAACCAACAGACCTGATGTCGTATCTCCAGATCGATACATCAACGGTGGTGCACCGG  
ATAATCTACAAGGCATTCAATGACGTAAAGAGTGCGGATTTTATCCTCTGCAACACGATACAAGAACTCG  
AACC GGAGACGATCTCTGCCCTTCATAAAAAACAGCCACCTACGCGATTGGGCCCATCTTCCCGTGGC  
CTTCAACAATAGCTCCGTGGCCACAAGCCTGTGGGCCGAGTCCGACTGCAGCCAATGGCTCAACACCAAG  
CCTCATGGGTCTGTTTTGTACATCTCTTTGGTAGTTATGCCATACCACCAAACATGATATTATGGAGA  
TAGCCTATGGGCTTTTGCTTAGTGGGTGGGTTTTGTTTGGGTGCTTCGCCCCGACATTGTGAGTTCGGA  
CGACGTTGACTTCCTACCGTTGGATTTGATGAAAATATCAAGGGTCAAGGCTTGATCGTGCCCTGGTGT  
CGTCAGATCGAGGTGATCTCGCATCTGCGATTGGAGGGTTCTTAACACACTGCGGATGGAATTCGATAC  
TGGAAAGTGTTTGGTATGAAATACCGTTGATTTGTTTTCTCTGTTGACAGATCAGTTCACTAATCGAAA  
ATTGGTTGTAGATGACTGGAAAATTGGGATCAATCTGCGCGATGAAAAATCAATCACGAGGGAAGAAGTA  
TCAAAAAAGATTAACTATTTGATTAACGAAAAAACTCTAATCAGCTAAGGAAGGAGATTAGGAAAGTGA  
GAGTACTTTTAGAGGATGCTTTGGCAAACGATGGATCATCAGAAAATAATTTTAATCAATTTATTAGGAA  
TTTCAAGGATAAACTTAATGTAAAAAAGAAATAA

>GWHPAAAL011200

ATGACGATCGGCGGCGCGGAGATCATATCCTGGTGTCCCTTACCCAGCGCAGGGCCACATGATTCCTC  
TCCTTGACCTACCCATCAACTCGCCATCCGAGGCCTAACCATCACAGTATTGGTCACCCCCAAAAATCT  
CCCTCTCCTCGATCCCCTTCTCTCCGAACACGAATCTGTGCAACCTTAGTCTTGCCTTTCCCGGTGCAC  
CCCTCCATCCCCGCCGGCTAGAGAACGTCAAGGACCTTCTGTGCGCGGATTCCGCGCTATGATGGTCG  
CCTTGGGTGAACTCCACGATCCTCTCCTCAGATGGTTCAGAACAGCCTTCCCCACCGAAGGCCATATG  
GTCGGATATGTTCTTAGGGTGGACCCATCACCTCGCCCGCGTCTCGGCATCCGCCGATTCGTATTCTCT  
CCATCTGGCGCTATGGCCTTGTGCGTAATTTACTCTCTGTGGCGTGAATTCCCAAGAAGAAGGGATTCAA  
ACGACTACAACGAGAAATTTCTTTCCCCAAAATCCCCAATTCTCCTATCTATCCCTGGTGGCAGCTCTC  
CCCATTCTCCGGAGTTATGTGGCCGGCACCCTGATTGCGAATTCATCAAAGATGGGTTTCTCGCGAAC  
ATAGCGAGTTGGGACTCGTGATCAACTCGGTACGCGAGTTGGAACGAGTATATTTGGAATATTTGAAGG  
GGGAATTGGGTATGATCGAGTATGGACGGTAGGACCGCTGCTCCCGCCGGATGGTGACCTCTCTAGGAC  
CGTAGAGAGAGGTGGATCCAGCTCAGTATTAACCAATCAGATCTCATGAGCTTGACAAGTGCAATGAT  
CGAACGGTTGTGTACGTCTGCTTCGGAAGTCAAGCGGTGTTGAGCAATGATCAAATGGAGCATCTAGCCT  
CGGGTTTGAAAAGAGTGGGTCCAAGTTCGTGTGGTCCGTCAAAGGAGCTACAACGGGACAAGAGAAGGG  
ATCATGCGGCCAGGTTCTCTCGGATTGGAAGAGAGTGTGGGTGCGAGGGGGCTCGTGATTAGAGGATGG  
GCACCGCAATTACTGATACTGAATCATCGAGCCGTGGGTGCGTTTTTAACCCACTGCGGATGGAACCTCGT  
TGCTGGAGGGATTAATCGCGGGGGTCCCTATGCTGGCCTGGCCTATGGGGGAGATCAGTTTGCGAATGC  
AAGCTTATTGGTGACGAGCTCAGGTGGCAATTCGTCTGTGCGAGGGTGCAGAGTTGTGCCAAGTTCCG  
AATGAGTTGGCTCGACTAGTTACGGAAGCAACCGGGGCGATTGGCCGGAAGAGGACGAGCAGAGGAGC  
TGAGAAAAGTTGCTTTGGGTGCGATCAAAGACGGTGAAGTTCGTTCACAATTTGAATGATTTGGTTAG  
ACATATTTCTGAGATTGTGTAA

>GWHPAAAL012110

ATGGAGGAATCAAAGAAGGAGGAGCACATAGTGATGCTCCCTTTCATGGCGCAGGGCCACCTCATCCCAT  
TTCTCGAGCTCGCCACCCAAATCCACCAATCCACCGCCTTACCGTCACCATCGCCACCACCCTCTCAA  
CACCCAATACCTCAAATCCACCGCAGCTAAACAAAACCCATCTCCGGAATCTCCGCCGGCGCCGCCATA  
CACTTTGTCTCCCTCCCTTTCAACAGTTCGACCATGGTTTACCCCCAACACCGAGAACACCGAGTCAC  
TGCTCTGACCAGATCATCTCCCTCTCCACGCCTCCTCCTCTCTGAAACCACATTTTCAGGATCTTAT  
CGCCGGAATCGCGGATAAAGAGGGTAAGCCTCCGATCTGCGTGATCTCCGACGTTTTCATGGGTTGGGCA  
AACGAAGTTGCTTTGTCCTTCGGAAGTGTGAATGTAGTTTACCACCGCGCGCGTACGGCACGGCGG  
CGTACGTTTCGATTTGGCAGAATCTTCCTCACAGATCGAGGGATTCCAACGACGAGTTTAGTCTCCGGG  
TTTTCCCGAGTCCCGGCGATTCCATATCTCGCAGCTCCACAGTTTCTCAGAGCCGCGATGGCACGGAT  
GAATGGTCTCTGTTTTTCCAGCCACAAATTCGCTCTCGATGGGCTCTTTTGGGTGGTTATGTAATACGG  
TGGAAGATATTGAGCCGCTGGGTTTGAAATTCTCCGGCGATATACGAAGCTCCGGTCTGGTGCATTGG  
ACCTCTTCTCCCTCGAAAAATGCTCCAGAGATCGTCTTCTTCAAATTCGGCGTAATCGGTCCCCGGAGC  
GGAAAAATTACCCGAGTTTCTCCGGAAAAATGCATCGAATGGCTTGAATTTACCCTCCGGCGTCCGTTT  
TCTACATCTCCTTCGGCTCACAGAACACGATCAGCGCAACCCAGATGATGGAATCGCCCACGGTCTCGA  
ATCGAGTGGCAAAACCTTTCATCTGGGTCGTCCGGCCGCGGTGGGTTCGATCCAAACTCCCAATTCAA  
TCCTCCGAATATCTGCCGGAGGGATTGCAACGGCGAGCGGCCGAGAACAACAGAGGTCTACTAGTCCACA  
AATGGGCACCCCAACTCGAAATCCTCTCCACAAATCCACCGAGCTTTTCTCAGCCACTGCGGCTGGAA  
CTCGACGATGGAGAGCTTGAGCCAGGGCGTGCCGATCATAGGGTGGCCGTTGGCGGCGGAGCAATCCTAT  
AACGCGAAGATGCTGGAGGAGGAGATGGGTGTCTGCGTGGAGCTGACCAGAGGAGTACAGAGTACCATTG  
AGAGAGACAAAGTGAAGAAGGTGATCGAATTGGTGATGGGTGAGAAGGGAAGGTGAAGAGATGAGGAA  
GAAGGCAGCCGCCATTGGAGAGGTGATCAGAGCTTCAGTCATGGAGGAGGGGAAGGGAGGAAGAAGGT  
TCAAGTGTTCAAGCAATGGATGATTTTATATCAACACTCATCTCCAATAGAGAGCAAAGCTTTCCACACC  
CACTTTGA

>GWHPAAAL012139

ATGGAGGAGAGGAGAGAGAACATAGTGATGTTCCCATTCATGGCGCAAGGCCACATGATTCCATTTTTGG  
CCCTGGCCTTGCAATTGGAGAAAAAGGGTTACGGCATAACCTTTGTCAACACTCCTCTCAACGTCCTCAA  
ACTCCGACAGTGTCTCCACCGGACTCTCCATTGCGATCCTTGAAATTCGGTTCAACAGCTCCGACCAT  
GGTCTTCTCCCAATTCTGAGAACACCGACGTCCTCCCCTACACCCTCATCGTCAACCTCCTCCACGCCT  
CTCTCTCTCTGGAATCCTCCTCAGGAACTTCTCTCTGATCTTATCCACGAGCAGGGTGGCGTCCGTCC  
GCTTTGCGTCATCGCGATATATTCTTTGGGTGGTCCGCCGGCGTCGCGGTGAGTTAGGCGTATTCCAC  
GCGATTTTCAGCGGCGCCGAGGGTTTGATTGGCGTGTTACTATTCTGCGTGGTTGAGTTGCCACACC  
GGACAACGATTCTATCGAATTCACGCTGCCGATTTCCTGAAGCCAGTAAATTTTCATGTACCCAGCT  
GCCCCGAGTATGCTGGCGGCTGACGGCACTGATCTGTGGTCGATTTTCCAGAGAAAAACCTTCCGGCG  
TGGACCAATTTCGACGGAGTTCTGTTTAAACAGTCGAAGGGTTCGACAAGCTCGGATTGGCATATTTCA  
GTCGCAAAATCGGGAAGCCAATCTGGGCGATTGGACCAACACTTCTATCAGTGCACCACAGAGCTCGTGT  
CGGCGGTAGAGAAGCCGCCATTACTCCAGAGCAATGCCCGAATGGCTTGATTCTGAAGCCACCCAACCTC  
GTAATCTACGTATCATTGCGATCAGAAAACAAATCTCAGCATCCAGATGATGCAATTGGCGAAGGCTC  
TGGACAAAAGCGAGAAGAATTTTCATCTGGGTTGTTAGACCCCACTTGGGTTTCGACATAAATTCAGAGTT  
TAAACCAGAAGATGGCTGCCGGAAGGGTTTACAGACCGGATCAAAGATCAAAACAGAGGTCTAATCGTT  
ATAAAATGGGCGCCCCAGGTGGAGATTTTGTGCATAAATCTATAGGGGCGTTTATAAGCCACTGCGGAT  
GGAATTCGGTGCTTGAAGCGTTGAGCAATGGGGTGCCGCTGATAGGGTGGGCGATGGCGGCGGACAGTT  
CTTCAACGTGAAGATGTTGGAGGAGGCGGTTGGAGTGTGCGTGGAGGTGGCGAGAGGGACATTTTGTAG  
GTGAGGCATGAAGATATAATGGAGAAGATAGAGGTGGTTATGGGGGAGAGTGAGAAGGGGAAGAGAATAA

GGAAGAGAGCTGGAGAATTGAAGGAGATAATCAAGGATGCAACGAGAGATGAGGAGGGCTTCAAGGGTTC  
TTCCGTGAAAGCCATGGATGAATTTTTAAGTGCTGCTGCAATGTCGATGAAGGAGAAGAAGACATTATTG  
GTTGAGACACAATGA

>GWHPAAAL013261

ATGGCTTCCGAATTCCACCATGCCACTTTGTTTTAATACCACTTATGTCCCCTGGCCACATAATCCCCA  
TGGTGGACATGGCGAAACTGTTGGCGAGACGTGGAGTGACAGTTACCCTAATCATGACCCAACATAGCGC  
CACTAGATTTGCTTCTGTGGTGGACCGCGCCATTAAATCTGGACTCCCCATTTCGGCTTCTCGAGTTTCGA  
TTTCCCTCGAAAGAAGCCGGTTGCCCGAGGGATGCGACAGTGTGATGATATCCCTAGTTATGACTTGC  
TACTAACTTTTTTAATGCCATTGACATGTCACAAAACCCATTGGAGCAATTGATCGAACACCTAGAGCC  
CAATCCTAGCTGCATAGTTTGCATAAGCATATCGCATGGACGGCAGAACTGCCAAAAAATTCAACATC  
CCGAGAATTATTTTCGATGGGATGAGCTGTTTCAGTCAACTATGCGTCCATAATCTTCACGTTTCCAAGG  
TCCACGAGAGATTTCAAGGGTCGGAGCCCTTCGTTCTTCCCGATTGCCTGATGAAATCGTGATAACAAG  
AGCTCAGCTTCCGGGGACATTCAACCCCGGATCGATGAAAAATTTGGACGAAATTCGTAAGAGAGTGAGA  
GAACTGAAAAGGAAGCGTATGGGGTTGTTGTGAATAGCTTCGAGGAGTTGGAACAAAGATATGTAAACG  
AGTACAAAAGGTAAGAGAAGATAGAGTCTGGTGCATTGGGCCGTTATCTCTGTGCAGCAATGAAACATC  
GGACATGGCGAACAGGGGAAACACAGCGTCAATCGATGCGAACCATTGCTTCAAATGGCTCGATTACGG  
CAGCCAAGATCCGTAATCTACGCTTGTTTAGGAAGCCTGAGCCGCCTCACGCCTCCACAATTCATTGAGC  
TCGCTCTAGGCCTTGAGTCAACAAATCAACCCTTTATTCTGGTGATCAAAGCAGGAGATAAAGTGAAAGA  
AATAGAGACCTGGATTAGCGAAAAATGGATTTCGAGGAGAGAACCAGAGAGAGGGGCCTGTTGATTTCGCGGA  
TGGGCCCCCAAGTGCTCATCTTGTCGCACGCAGCAGTTGGTGCTTTCCTGACCCATTGCGGTTGGAATT  
CGACTCTGGAAGCGGTTTGCGCCGGCGTGCTCTCATCACGTGGCCGCTCTTTTCGGAGCAGTTTCTGAA  
CGAGAAGTTTCGCAGTGCAGGTGTTGAAGATCGGGGAGAGTGTTCGGAGCTAGGGTTGCAGTGGGCCTGGGG  
GAGGAGGAGAAGTCGGGGGTGAAAGTGGAGAGGGAGGAGGTAGAGGCGGCGGAGGAGGCTAATGGAGG  
AGGGAGAAGAAGTGGGGGGAGAAGAAGACGGGCGAGAGAGTTGGCGGAGATGGCGAAGAGAGCGGTGGA  
GGAAGGAGGATCTTCTCACCTTAACATGACAGTGATGATCCAAGATATCGTGTCCATCAAGAGAGAGGAG  
ACATGA

>GWHPAAAL013365

ATGTCTACTCCTACTGATAATGGAGAAAAGCTACACATAGTTATGTTCCCATGGCTCGATTTCGATCACA  
TGATCCCATTCTTAGAGCTCGCCAAGCTCATTGCCAAAAGGGTCATAAACTCACCTACGTGTCGACCCC  
CCAAAACATCAGATGGTTACCCAACCCCTCCGCTAAATTGGGTCTTACTGCCACTACCAATAGTTGAAAGC  
GTCCCTGATAATGCCAAGGCCACTGTTGATGTCCCCTCCGGAAGGTGAGTTGCCTAGTGATGCTTTTCG  
ATCGGCTTGAAACCGAGTTAACTCGGTTCTTGGAGGCATCAATGCCAGACTGGATTATTTACGATTTTGC  
CCCTCCATGGCTTCCAACAGTTGTGGGTAATCTCGGAATTTCAAGGGCTTTCTTCAACGTAAGAAACGCT  
TCCTTCGTATATTCGATGATAAAGGGTTGTGACTTGCCCAATGATATCATAGGCCCACTTGGGGTCCACC  
GTCTCTGGTCCAGATGCGACGTGTTTCGCTACCCGAGACTGCACCGAATTCGAGCCCCATTGCCTGAACAC  
TCTCCGCAAGGTTACCCAAAAGCCTGTGATTCCGGTGGGCTTGATGCCCTCCTTGGTGCACGATAGCGAA  
GACGACAAAACCTACACATGGCTAGCAATCAACGATTGGCTACAAAAACAGAACAAAGAGTCGGTCGCCT  
ATGTGGCGCTCGGGATCGAAGTTTTCAAGAATCAAGAATCGCTCAGCGAGATGGCAATCGGGCTCGAATT  
GTCTAGTTTGGCCTTCTATGGGCCCTCAGAAGGCCCATGGCTCAACCGAGCTCGGCTCCGTCAGGCTT  
TCATTAGGGTTTGAGGAGCGAACCAAGGCACGTGGGATCGTCTGCAGGACCTGGGTCCACAAAGCCAAGG  
TCTTGGCTCACGGCTTGGTGGGTTGTTTCATGACTGGGTGCGGTGGAGCTCTGTGATAGAGGGGCTTCA  
GTTTGGTGCATCCCTATTGATGATGCCATTACAGAAGAACAAAGGTTGAATACTAGGGTGTGCGTAAAG  
AAAAACATGGGAATAGAAATAGCTCAAGTTGGATCGTTGACAAGAAATTCGGTGGCTGACACGTTGAAAC  
TGGTAATGTCAAATGATAATAATGAAGGGAACTTATAAGAGAAAAGGTGAAGATGATGAATTGGATATT

TGGAGATAAGGCCAGACATGACCTTTACATGGACAATTTTGTTGATTATCTTCAAACTACAGAAGTCTA  
AACAAGGTTCCCTGA

>GWHPAAAL013653

ATGACTTCTCCTTCTTCTTCTCCTCCCTCACTTCCCCATGTCTTCATGGTCTCATTTCCAGGCCAAGGCC  
ACGTC AACCTCTCCTCCGACTCGGCAAATACCTCGCTTCAAAGGGTCTACTCATCACTCTTTGCACGCC  
GGAAATCTTCGGCAAACAAATCCGAAATCAAATCCCATAAATCGCCGGCGAAAACCCATTAAAAATCGGC  
GAAGGTTTCATCAGGTTGAGTTTCATCCAGGACGATTTGGAAGAAGATGACCCCATATTCAAGGACTTCG  
ATCTTTACTTTCCCGACCTCGAGATGAAAGGGAAAGCGGCTCTTCAACGTATGATCGAGGAAAAACAAGGT  
AATGGGTCGTCCGGTGTCTGTGTTAATCAACAATCCGTTTATTCCATGGGTTTCGGATGTTGCAGAAGCT  
ATGGCGATTCCAAATGCTATGCTTTGGGTTTCAGTCTTGTGCTTGTGTTTTCGGCGTATTATCATTATGGTA  
AAGGGTCGGTGCCGTTTCTAGTGAGAGAGAGCTTGAGCTCGATGTTTCAGTTGCCGGCGATGCCGCTTCT  
GAAGCACGACGAGATTCCAAGCTTTCTGCATCCAACGACTCCGTACACGGTTTTCCGGCGGGCGATTATG  
GGCAGTATCGGAATCTGTCGTACCCTTTTTGTATACTGATGGATACTTTTATGGAGCTTGAGGAGGAGT  
TGATTGAGAATATGTCGGAGATTTGTCCGGTGAAGCCGGTGGGGCCGTTGTTTCAGGAACGCCGGAGGTTA  
TGGGTCGGAGATTCGCGCGCATATGATGAGGGCCGACGAGGAGTGCTTGAAATGGCTGGATTTCGATGCCG  
GAATGTTTCAGTCGTGTACGTGTCTTTCGGTAGCATCGTGAGTTTAAAAACAACTCAGCTCGACGAATTCG  
CCGCCGGGATTTGAATTCGGCGGTTTCGTTCTTGTGGGTGGTGAACCCGGTGCCCGAAAAGCCGGTGAA  
GTTGCCGAGGTTTTTTTGGAGAAAGCCGGGATAGAGGAAAAATCGTGAGTGAGTCCACAGGAGCAG  
GTGTTGGCCACCCGGCGGTTCGCGTGTTCGTCACCCACTGCGGCTGGAACCTCGTCGATAGAGCGGTGG  
CGAACGGCGTTCCTGTTGGCGTTTCTCAGTGGGGCGACCAGGTGACGAACGCCAAGTACTTGGTGGA  
GGTGTTTCGAGTTGGGCTCCGACTGAGCAGAGGGGAGGCGGAGAACAGGACAGTCACGGCGAAGGAGGTG  
GAGAGGTGTCTCCTGGAGCAACGAGCGGCGGAAAGGCGGCGAGTTGAAGGAGAAGGCGTTGAAGTGGA  
AGAAAAAGGCGGAGGAAGCGGTGGCGGAAGGTGGCTCGTCTAACCGGAATATGAAGGACTTTGTGGAGGA  
GGTCAAAAGAAGAAGTATTTAA

>GWHPAAAL013654

ATGGTTTCCCTTTTCTTCTTCACTTCCCCATGTCTTCATGGTCTCTTTTCCAGGCCAAGGCCATGTTA  
ACCTCTCCTCCGACTCGGCAAATACCTCGCTTCAAAGGGTCTACTCATCACTCTTTGCACGCCGGAAAT  
CTTCGGCAAACAAATCCGAAAGCAAACCCCATAAATCGCCGGCGAAAACCCATAAAAAATCGCGGAAGGT  
TTCATCAGGTTTCGAGTTTCATCCAGGACGTTTGAAGAAGGAGACCCCATATTCAAGGACCCCGATCTTT  
ACTTTCCCGACCTCGAGATGAAAGGAAAGCGGCCCTTCATCGTATGATCGAGGAAAAATAAGGAAATGGG  
TCGTCTGTATCGTGTGTTGATCAACAATTCGTTTATTCCATGGGTTTCGGATGTTGCAGAGGTATGGCG  
ATTCCTAATGCTGTGCTTTGGGTTTCAGTCTTGTGCTTGTGTTTTCGGCGTATTATCATTATGGTAAAGGT  
CGGTGCCGTTTCTAGTGAGAGAGAGCTTGAGCTCGATGTTTCAGTTGCCGGCGATGCCGCTTCTGAAGCA  
CGACGAGATTCGAGCTTTCTGCATCCAACGACTCCGTACACAGTTTCCGGCGGGCGATTATGGGCGAG  
TATCGGAATCTGTCGTACCCTTTTTGTATACTGATGGATACTTTTATGGAGCTTGAGGAGGAGTTGATTG  
AGAATATGTCGGAGATTTGTCCGGTGAAGCCGGTGGGGCCGTTGTTTCAGGAACGCCGGAGGTTATGGGTC  
GGAGATTTCGCGCGCATATGATGAGGGCCGACGAGGAGTGCTTGAAATGGCTGGATTTGATGCCGAATGT  
TCAGTCGTGTACGTGTCTTTCGGTAGCATCGTGAGTTTAAAAACAACTCAGCTCGACGAATTCGCCGCCG  
GGATTTTGAATTCGGCGGTTTCGTTCTTGTGGGTGGTGAACCCGGTGCCCGAAAAGCCGGTGAAGTTGCC  
GGAGGTTTTTTTGGAGAAAGCCGGGATAGAGGAAAAATCGTGAGTGAGTCCACAGGAGCAGGTGTTG  
GCCCACCCGGCGGTTCGCGTGTTCGTCACCCACTGCGGCTGGAACCTCGTCGATAGAGGCGGTACGAACG  
GCGTTCCGGTGGTGGCGTTTCTCATTGGGGCGACCAGGTGACGAACGCCAAGTACTTGGTGGAGGTGTT  
CGGAGTTGGGCTCCGACTGAGCAGAGGGGAGGCGGAGAACAGGACAGTCACGGCGGAGGAGGTGGAGAGG  
TGCTCCTCGGGAGGCAACGAGCGGCGGAAAGGCGGCGGAGTTGAAGGAGAAGGCGTTGAAGTGAAGAAGA

AGGCGGAGGAAGCGGTGGCGGAAGGTGGCTCGTCTGACCGGAATATGAAGGACTTTGTGGAGGAGATCAA  
AAGAAGAAGTATTTAA

>GWHPAAAL013655

ATGGTTTCCCCTTTTCTTCTCACTTCCCCATGTCTTCATGGTCTCTTTTCCAGGCCAAGGCCATGTTA  
ACCTCTCCTCCGACTCGGCAAATACCTCGCTTCAAAGGGTCTACTCATCACTCTTGCACGCCGGAAT  
CTTCGGCAAACAAATCCGAAAAGCAAACCCATAATCGCCGGCGAAAACCCATAAAAAATCGCGGAAGGT  
TTCATCAGGTTTCGAGTTCATCCAGGACGGTTTGAAGAAGGAGACCCCATATTCAAGGACCCCGATCTTT  
ACTTTCCCACCTCGAGATGAAAGGAAAGCGGCCCTTCATCGTATGATCGAGGAAAATAAGGAAATGGG  
TCGTCTGTATCGTGTTTGATCAACAATTCGTTTATTCATGGGTTTCGGATGTTGCAGAGGTATGGCG  
ATTCCTAATGCTGTGCTTTGGGTTTCAGTCTTGTGCTTGTTTTGCGGCGTATTATCATTATGGTAAAGGGT  
CGGTGCCGTTTCTAGTGAGAGAGAGCTTGAGCTCGATGTTTCAGTTGCCGGCGATGCCGCTTCTGAAGCA  
CGACGAGATTCGAGCTTTCTGCATCCAACGACTCCGTACACAGTTTCCGGCGGGCGATTATGGGGCAG  
TATCGGAATCTGTCGTACCCTTTTTGTATACTGATGGATACTTTTATGGAGCTTGAGGAGGAGTTGATTG  
AGAATATGTCGGAGATTTGTCCGGTGAAGCCGGTGGGGCCGTTGTTTCAGGAACGCCGAGGTTATGGGTC  
GGAGATTCGCGGCGATATGATGAGGGCCGACGAGGAGTGCTTGAAATGGCTGGATTTGATGCCGAATGT  
TCAGTCGTGTACGTGTCTTTCGGTAGCATCGTGAGTTTAAACAACTCAGCTCGACGAATTCGCCGCCG  
GGATTTTGAATTCGGCGTTTCGTTCTTGTGGGTGGTGAACCGGTGCCCGAAAAGCCGGTGAAGTTGCC  
GGAGGTTTTTTTGGAGAAAGCCGGGGATAGAGGGAAAATCGTGGAGTGGAGTCCACAGGAGCAGGTGTTG  
GCCCACCCGGCGGTGCGGTGTTTCGTACCCACTGCGGCTGGAACGTCGTCATAGAGGCGGTGACGAACG  
GCGTTCCGGTGGTGGCGTTTCTCATTGGGGCGACCAGGTGACGAACGCCAAGTACTTGGTGGAGGTGTT  
CGGAGTTGGGCTCCGACTGAGCAGAGGGGAGGCGGAGAACAGGACAGTCACGGCGGAGGAGGTGGAGAGG  
TGCTCCGGGAGGCAACGAGCGGCGGAAAGGCGGCGGAGTTGAAGGAGAAGGCGTTGAAGTGAAGAAGA  
AGGCGGAGGAAGCGGTGGCGGAAGGTGGCTCGTCTGACCGGAATATGAAGGACTTTGTGGAGGAGATCAA  
AAGAAGAAGTATTTAA

>GWHPAAAL013658

ATGGTTTCCCCTTTTCTTCTCACTTCCCCATGTCTTCATGGTCTCTTTTCCAGGCCAAGGCCATGTTA  
ACCTCTCCTCCGACTCGGCAAATACCTCGCTTCAAAGGGTCTACTCATCACTCTTGCACGCCGGAAT  
CTTCGGCAAACAAATCCGAAAAGCAAACCCATAATCGCCGGCGAAAACCCATAAAAAATCGCGGAAGGT  
TTCATCAGGTTTCGAGTTCATCCAGGACGGTTTGAAGAAGGAGACCCCATATTCAAGGACCCCGATCTTT  
ACTTTCCCACCTCGAGATGAAAGGAAAGCGGCCCTTCATCGTATGATCGAGGAAAATAAGGAAATGGG  
TCGTCTGTATCGTGTTTGATCAACAATTCGTTTATTCATGGGTTTCGGATGTTGCAGAGGTATGGCG  
ATTCCTAATGCTGTGCTTTGGGTTTCAGTCTTGTGCTTGTTTTGCGGCGTATTATCATTATGGTAAAGGGT  
CGGTGCCGTTTCTAGTGAGAGAGAGCTTGAGCTCGATGTTTCAGTTGCCGGCGATGCCGCTTCTGAAGCA  
CGACGAGATTCGAGCTTTCTGCATCCAACGACTCCGTACACAGTTTCCGGCGGGCGATTATGGGGCAG  
TATCGGAATCTGTCGTACCCTTTTTGTATACTGATGGATACTTTTATGGAGCTTGAGGAGGAGTTGATTG  
AGAATATGTCGGAGATTTGTCCGGTGAAGCCGGTGGGGCCGTTGTTTCAGGAACGCCGAGGTTATGGGTC  
GGAGATTCGCGGCGATATGATGAGGGCCGACGAGGAGTGCTTGAAATGGCTGGATTCGATGCCGAATGT  
TCAGTCGTGTACGTGTCTTTCGGTAGCATCGTGAGTTTAAACAACTCAGCTCGACGAATTCGCCGCCG  
GGATTTTGAATTCGGCGTTTCGTTCTTGTGGGTGGTGAACCGGTGCCCGAAAAGCCGGTGAAGTTGCC  
GGAGGTTTTTTTGGAGAAAGCCGGGGATAGAGGGAAAATCGTGGAGTGGAGTCCACAGGAGCAGGTGTTG  
GCCCACCCGGCGGTGCGGTGTTTCGTACCCACTGCGGCTGGAACGTCGTCATAGAGGCGGTGACGAACG  
GCGTTCCGGTGGTGGCGTTTCTCATTGGGGCGACCAGGTGACGAACGCCAAGTACTTGGTGGAGGTGTT  
CGGAGTTGGGCTCCGACTGAGCAGAGGGGAGGCGGAGAACAGGACAGTCACGGCGGAGGAGGTGGAGAGG  
TGCTCCGGGAGGCAACGAGCGGCGGAAAGGCGGCGGAGTTGAAGGAGAAGGCGTTGAAGTGAAGAAGA

AGGCGGAGGAAGCGGTGGCGGAAGGTGGCTCGTCTGACCGGAATATGAAGGACTTTGTGGAGGAGATCAA  
AAGAAGAAGTATTTAA

>GWHPAAAL014206

ATGGCAAAAAATACTCATGTCGTGATGCTTCCATGGTCGGCGTTCGGTCACATTATCCCCTTCTTCCAGC  
TCTCCATAGCCTTAACTAAAGCCGGAATCCATGTGTCTTCGTCTCCACACCGAAAAACATCCGGCGACT  
CCCCCAAATACCGTCGGATTCCGTTCCCTTTCATTGATTGGTGGAGCTCCCGTTGCCGGAGATCGACCGG  
AGTCTCTTGCCGGCAGATGCAGAGGCCACCGTCGACATACCCACTGAAAAATATTCAGTACCTTAAGATTG  
CTTACGACCTCTTAAAAAACCCCTTCAGTCGGTTTCGTTCGCCGACCGGTTGCCGGACTGGATCGTCATCGA  
CATGATGCCTCACTGGGCCGTCGACGTGGCCAAAGAGTTCGACGTTCCGGTCATTTACTTCAGCGTGTTT  
GGCGCCGCCGCTGCCGTATTCTGGGGGCCGCCGAGTATATCGCTGGCGAAGGTCAGAAAAATGAAACGTT  
CGACCCCGGAATCCCTGACTTCGACTCCGGAGTGGGTTCGATTTCCCGTCGGCGGTTGCTTATGGGCAAAA  
CGAAGCGGTGTCTTTCCACGCTGGAGCCTACGGAGAAAACGCCTCCGGCATCAGCGACGCCGGCCGTGTT  
GCCAGAATACTCCATTTCATGTAGAGCCCTGGCCATTTCGAGTTGCCCCGAGTTCGAACACGATTACTTGA  
ATCTACTCGAGAAAAATCCATCAAAAACCGGTGATTCCCGTCGGACTACTCCCGCCAGAACAAAAATCGGA  
AGCTAGAAACTCCGGCGATAAATTCAAAATCTTCAAATGGCTTGATCAACAAAAACCCAAATCGGTTATC  
TTCGTTCGGATTTCGGTAGCGAATGCAAACTAACCGAAAAATCAAATTCACGAAATAGATTACGGTCTGGAGC  
TGTCGGAATCCCATTTCTATGGTCGCTCAGAAAACCCAGCTATTCAACCGACGAGCTCGACCCTCTTCC  
GCCGGATTTCCACCGCCGCATCGCCGAAAAAGGACTAGTACACGTCGGATGGGCGCCGACGAGGAGATT  
CTCGCCACCCATCCGTCGGAGGCTCTCTGTTTCACTCCGGCTGGGGATCGGTGATCGAGACTCTGCAAT  
TCGGACACCGTCTCGTCGTCTTGCCGTTGATTATCGATCAGCCGTGAACGCGAGGTTGCTGGTGGAGAA  
GGGTTTGGCAATAGAAGTGGAGAGAGGCGGAGATGGTTCGTTTGGCGGGGACGCCATAGCTAAAGCTCTG  
AGAGAAGCCATGGTTATGGAAGGAGGAGAGAGAGTGAAGAGCTATGGCGATATTCGGAGATCGGAAGT  
TGCAAGAGAACTACGTGGAGAGATTGCCGAATACCTGAAAAATGGAGTGGCAAAAAAGAATCGGTAA

>GWHPAAAL014233

ATGGAGGAGAGGAGAGAGAACATAGTGATGTTCCCATTCATGGCGCAAGGCCACATGATTCCATTTTTGG  
CCCTGGCCTTGCAATTGGAGAAAAAGGTTACGGCATAACCTTTGTCAACACTCCTCTCAACGTCCTGAA  
ACTCCGACAGTGTCTCCACCGGACTCCTCCATTTCGCATCCTTGAAATTCGTTCAACAGCTCCGACCAT  
GGTCTTCTCCCAATTCTGAGAACACCGAGCTCCTCCCTACACCCTCATCGTCAACCTCCTCCACGCT  
CTCTCTCTGGAATCCTCCTTCAGGAACTTCTCTCTGATCTTATCCACGAGCAGGGTGGCGTCCGTCC  
GCTTTGCGTCATCGCGATATATTCTTTGGGTGGTCGCCGGCGTCGCGCGTGAGTTAGGCGTATTCCAC  
GCGATTTTCAGCGGCGCCGAGGGTTTGATTGGCGTGTTACTATTCTGCGTGGTTGAGTTTGCCACACC  
GGACAACGGATTCTATCGAATTCACGCTGCCGATTTCCTGAAGCCAGTAAATTCATGTCACCCAGCT  
GCCCCGAGTATGCTGGCGGCTGACGGCACTGATCTGTGGTCGATTTCCAGAGAAAAACCTTCCGGCG  
TGGACCAATTCGGACGGAGTTCTGTTTAAACAGTCGAAGGGTTCGACAAGCTCGGATTGGCATATTTCA  
GTCGCAAAATCGGGAAGCCAATCTGGGCGATTGGACCAACACTTCTATCAGTGCACCACAGAGCTCGTGT  
CGGCGGTAGAGAAGCCGCCATTACTCCAGAGCAATGCGCCGAATGGCTTGATTGGAAGCCACCCAATCC  
GTAATCTACGTATCATTTCGGATCAGAAAAACAATCTCAGCATCCAGATGATGCAATTGGCGAAGGCTC  
TGGACAAAAGCGAGAAGAATTCATCTGGGTTGTTAGACCCCCACTTGGGTTCGACATAAATTCAGAGTT  
TAAACCAGAAGAATGGCTGCCGGAAGGGTTACAGACCGGATCAAAGATCAAACAGAGGTCTAATCGTT  
ATAAAATGGGCGCCCCAGGTGGAGATTTTGTGCATAAATCTATAGGGGCGTTTATAAGCCACTGCGGAT  
GGAATTCGGTGCTTGAAGCGTTGAGCAATGGGGTCCGCTGATAGGTGGGGCATGGCGGCGGACCAATT  
CTTCAACGTGAAGATGTTGGAGGAGGCGGTTGGAGTGTGCGTGGAGGTGGCGAGAGGGACCATTTTTGAG  
GTGAGGCATGAAGATATAATGGAGAAGATAGAGGTGGTTATGGGGGAGAGTGAGAAGGGGAAGAGAATAA  
GGAAGAGAGCTGGAGAATTGAAGGAGATAATCAAGGATGCAACGAGAGATGAGGAGGGCTTCAAGGGTTC



TTCCGTGAAAGCCATGGATGAATTTTTAAGTGCTGCTGCAATGTCGATGAAGGAGAAGAAGACATTATTG  
GTTGAGACACAATGA

>GWHPAAAL014996

ATGGAGATAACGGATGGAGAAAACAGGGTCGTCCCAAAATCGCGTCCTGGTTATTCCATTTCCGTCACAAG  
GCCACATCAATCCCATGCTCCAATTCTCCAAGCGTTTAGCCGCCAAAGACCGCCGCCGAGCCTTGGGAT  
CACCTTAGTCACCACTTCCACCACCAAATCTCCGCCCTATCTCAACCACCTACCTCCGTCTCTGTGCGAA  
TATCTACCCGATGACTCCGACGATGATCAACCGGATGACGTAGGAGCCTTCTTCCGGCGTTTCGAGAAAA  
CAGTCACCGAGGGACTGCCGGGGCTAGTGGAGAGGCTAAAAAACTCCGGCAGCCCCGCGAGAGTGGTGGT  
GTATGATTCCATCATTCCATGGGTTCTAGACATAGCCCATCCGCTGGGCTTGAAAGGGGCTTGCTTCTTC  
ACTCAGACCTGTGCGGTGTGCGCTATCTACTACCACGTGCACCGAGGAACACTCACAGTTCCTTCCGAGG  
AAGAGGAGGAAGACCATCGATCATCTGTACGCTTCTCTGGGATGCCGTTGATGGAGATCAAAGATCTTCC  
TTCTTTTGTCTACGACATCGACCAGTATCCTTATGCTTTGCGCTTGCTTCTTGCTCAGTTCTCCAACACC  
GGGGAAGCAGAATGGATCTTTTTCAACACTTTCGACAAGCTAGAACATGAGGTGATAGACAATTGGGCGG  
CAAGAGAATGGCCAAGAATGAAGAGCATTGGACCAACAATTCCATTGGCGTACTTGGAAGAAGAAGACAA  
CACACTCCAAAACGACATAGATTATGGGCTTAATCTCCTAGACTCAAACCTCGAAGCCTGCATGAATTGG  
CTGGACGCCAAGGAAACCGCATCTGTGCGCTATGTATCGTTTGGCAGCGTCGCCAACCTCAACAACGAGC  
AAATGGAGGAAGTACTGGGGCTTGATAAGTAGTGGAACCCACTTCCTGTGGGTCGTGAGAGCTTCCGA  
AGAAAGCAAACCTCCACCCAATTTACCGATCAGGCTTTAGAAAACGGTCTAATAGTGAATTGGTGTCCC  
CAACTCCAAGTTTGGCTCACCGGGCGGTGGGTGTTTCGTGACACACTGCGGTGGAACTCGACGCTGG  
AAGCACTGAGTCTTGGGGTTCGCTAGTGGCGATGCCTCATTGGTCGGATCAGACAACAAATGCAAAGTA  
TGTTTCCGATGTTTGAAAGTCGGGTTTCGGGAAGAGGGGTCGAGAAAGGGGCAGGAGTTGTGGGGAGG  
GCGGAAATAGAGAGGTGCGTAAAGGAAGTTATGGAGGGAGAGAGTGGGGATGAGGTGAGGAGGAATGCAG  
TTAGGTGGAAGGAGTTGGCTAGAGAGGCTGTGGCTGCAGGGGGAAGCTCTGATAACAATATTCAAGAATT  
TGTCTCTCAACTTGTTAAACTATGA

>GWHPAAAL015368

ATGACCAACACTAACAGAGTAGAGCTCGTCTTCATCCCTTCACCGGGGATGGGTACCTCGTCTCTGCCG  
TCGAGATGGCCAAGCTTCTCGTCGATCGAGACCAACGTCTCTCCATCACCTCCTCATTATGAAAGCACC  
TTTCAAAACCAAGGCCAATTACTCGCCGGCCCAATCGCTCTCCACAGCTGCGGCCTCTCGAATACGGTTC  
GTGGATCTCCCAGGCGACGAATTGGAGTCCGACGCCAAATCTCCCCTCACACCTTCCTTTCCGGCTTCA  
TCTCCGGCCAGAAGACGCTGGTTAGGGACGCCGTTGCGCAATCTCCTCTTCTCCAGAAGCTCCCAGACT  
CGCCGGTTTCTTCATCGACATGTTCTGTACTTCCATGATCGACGTTGCCGATGAGTTCGTGTCCCGACC  
TACGTGTTCTTCACTTCCGGCGCCGCATTTTGGGACTCGTGTTCCATCTCCAAACCATGAGAGACGACC  
ACAATCACGACGTACCGAGTTAAAGGACTCCGATGCCGACTTACTGGTCCCATGTTTCGTCAAATCGGT  
CCCGACTAAAGTACTGCCGTCGGTGGTCTCGATAAGGAAGGTGGGTCTGAGATGTTCCATGATCTCGTC  
CGACGGATCAGGGAGACAAAGGGCATCTTGATCAACACGTTCTCCGAGCTCGAATCTCACGGATCCATT  
CCATCAACACCCCGCCTGTCTACCCGGTGGGACCATCCTGAACGTCGCCGGCGACAATGACAACGAATC  
CACCTCCGCCGCCGCGATCCTGAAGTGGCTCGACGATCAACCGCCGTCGTGCGTTGTCTTCTCTATGTTTC  
GGAAGCATGGGATGCTTCGGCGTTGACCAAGTAAACGAGATCGCCACGCCCTGGAACGCAGCGGCCACC  
GCTTCTGTGGTCCCTACGGCGGCCGCCGCCGAGGGGAAGCTAGAGTTCCCCGGAGATTACACGAATTT  
GGAGGAGGTTTTACCGGAACGGTTTTTGGAAAGGACGGCGGAGATCGGGCGAGTGATAGGGTGGGCGCCG  
CAGGCGGCAGTACTGGCTCACAGGGCAGTGGGAGGGTTTGTGTGCACTGCGGTTGGAATTCAACGCTGG  
AGAGTGTGTGGTACGGGGTTCCAATGGCGGCGTGGCCACAGTACGCCGAGCAACAGCTGAACGCCCTTCT  
GATGGTGGAAAGAGTTGGAGATGGCGGTGGAGATTAAGATGGATTATAGAAACGGATTTTACTCAAAGAGT  
GGAGTTGCTTTGAGGAGCGAAGAGATAGAGAAGGGAATACGGCGGTTGATGGAGTGCGGTGAGAATGGGA

TGAGGAAGAAGGTGGAAGAGATGAGGGAGAAGAGCCGAGTGGCGGTGAGGGAAGGCGGATCTTCTTACCT  
TTCTATTGGGCGTTTGATCGAGGATGTAATGAAAATAGTTGAACAATGA

>GWHPAAAL015516

ATGGCCTACCATCACCCCGCCAAACGCAACCGCAGGTGGCGGTTGTGGTGGTTCCTTTCCCGCACAAG  
GCCATCTCAACCAGCTACTCCAACCTCTCCCGCTCATCTCCTTCTACCACATACCCGTCCACTACGTCGG  
TTCCGCCACCCACAACCGCCAAGCCAAACTCCGCAACCACGGATGGGACCCTCTCTCCGCTACCAACATC  
CATTTCACGAATTCTCAACTCCCCATTTCTCTCTCCGCCGCCGGATCCCCACGCCGCCGTCAAATTCC  
CCTCCCATCTCCAACCTCCTTCGAAGCCTCTTCTCATCTCCGCCGCCCGTCGCCGCTTTAATGCGCGA  
ACTCTCCCAAAAATTCCGACGAATCATCATCGTCAACGATTCCCTCATGGGATCGGTGGTTCAAGACTTC  
GTTTCACTGCAGAACGCCGACGCCTACACTTTCCACAGCGTCTCCGCTTTGCCATGGCTTTGTTCTTCC  
GGGAAAGCACCAGAAAACATTTCTCCGTCCATGCAGAACTACTAAACGGCGTCCCGTCGCTCGACGGCTG  
CTTACCGCCGACTTCCTTAACTTCTCAAACCCAACATTACTACACCCAGTTCAGCTCCGGCCGAATA  
TACAACGCGTGCAGATTAATCGAAGCTCCATTTCTCGACATACTTTCTCAAGATCACGACACCGCCATTA  
ATAAGAACAAGAAGCATTGGGCTCTCGGCCCTTTCAATCCCATCTCCATAACCCATAATAAGAGACCCAA  
TTCACGCCATAAAATGCTTGAATGGCTCGACAAACATGATCAGAACTCCGTCATATTGGTTTCTTTGGC  
ACCACGATATCCTTAAGCGAAGAACAGATCAAAGAACTCGCGACTGGGTAGAACAAAGCGGTCAAAAAT  
TCATCTGGGTATTAAGAGATGCAGACAAAGGAGATGTTTTCAACGAAGAAGATGAAGTTAGGAGGGCTGA  
GCTTCCAAAAGGGTTTGAAGATAGAGTAGAGGGGAGGGGTTTGGTGGTGAGGGAATGGGCGCCGAGTTA  
GAGATTTTAGGCCACCTTCCACCGCGCTTTCATGAGTCACTGCGGTTGGAATCTTGTATGGAGAGTA  
TTACAATGGGAGTTCCCATGGCGGCTTGGCCGGTGCATTCCGACCAGCCGAGGAATGCAGTGTGGTCAC  
TAAGTTTCTCAAGATTGGGTGCGGTCAGGACTGGGCTCGTCGGGATGAGGTGGTGATTGCTTTGACA  
GTGGAGAACGCCGTGAAGAAGCTAATGGCGGCGGAGGAAGGGCGGAGATGAGGAAGAGGGCGGAGGAAC  
TCGGTGGTGGGTCCGAGATCGGCGGCGGAAGGCGGCGCAAGTTGTAAAGAAATGGATGCGTTCATCGC  
CCACATTACCAGAATCTAG

>GWHPAAAL015754

ATGTCCGGAGATCGTAAGCTACACATAGTCATGTTCCCATGGCTTGCCTTTGGTCACATGATCCCATATT  
TAGAGCTCGCCAAAGCTCATTGCCGAAAAGGGTCACAAAATCTCCTTCCTTTCCACCTCCAGAAACATCGA  
TCGTCTCCCCAAATTGCCCCACATCTAACTCCCGTCATAGACTTCGTCAAGCTCCAGTTGCCCCACGTC  
GAAGGCCTCCCAGAAAACGCCGAGGCCACCTCCGACGTTCTTATAACAAAGTCAAATACCTCAAAGTGG  
CCTACGATCTTCTCCAAGAACCCATCGCTCGATTCTTCTGAATCTCGTCTCCCGATTGGGTGCTTTTCGA  
TTTTGTTTCTTACTGGTTGGGTCCGATTGCTTCTGAATTGAGGATTCCAAGCGCTTTCTTCAGTATATTT  
ATTCCGGCTTTCTTGGGGATTTTCGGCCCCGTACCGGTACTAAAGGGTACGGATGAGGCTCGAACGAAAC  
CCGAGGATTTACGGTCTCGCTAAATGGGTTCTTTCAAATCGACGGTCGCGTTCCGGCTATTTGAGAT  
TCAGCGTATTTTCGACAGCGTTACCGGCGACGAAATGAACGTTCCCGACACCTATCGCGCTGGATGCACC  
ATCGAGAGCTGTGACATAATTGCTATAAGAAGCTGTCACGAGTTCGTACCGGAATGGATAAAGGTTCTCG  
AGGAGATCCACCAGAAACCGGTTATACCGGTGGGTCAACTGCCAACCACGGGTACGATGGTGGCGAAGA  
CGACAAGGACGCCAGTGGGAAAAGATGAAAGAGTGGCTCGACACAAAGGAAAAAAGTCCGTCGTCTAC  
GTTGCGTTTGGCAGTGAGGCGAAACCGAGTCAAGCTGAACTCACTGAGATAGCTCTCGGGTTAGAGCTAT  
CCAGGTTGCCATTCTTTTGGGTCTCCGGAACCGACGGGGTAACGCCGACACCGAGCCGATCCAGCTGCC  
AGAAGGGTTTCGAGGAGCGAACCAGAGGTCGCGGGTGGGTCTGCACGAAATGGGCTCCTCAACTGAAGATA  
CTAAGTCACGACTCGGTGGGAGGTTTCTGACTCATTCGGGCTGGAGTTCGGTGGTGGAGGCCGTACAGT  
TCGAGAGAGCTCTGATACTGTTGACCTTCTTGGCGGACCAAGGGCTGAATGCTAGGGTTCTGGAGGAGCA  
GAAGATGGGTTATTCGATTCCGAGAGACGATCGAGATGGGTCGTTACGCGGGACTCGGTGGCTAACTCA  
GTGAGGCTGGTGATGGTGAAGAAGGAGGAAAGATTTACAGAGAGAAGATGAAGGAGATGCTAGGAGTGT

TTGGAGACAGGGATAGACAAGATGGTTACGTCGAGAATTTTCTACGTTATCTCCAGAATTATAAAATACC  
GACAAGCGAAGATCCAAACAAGAAAGATTCAATTTTTATTTTTATTTTTCTCCATTCTCCCTCGTTCGTC  
TTTTCTCTGCCCCTCGCCATTCTCTTCTCCAAGCCAGCCAACGCCCTCTAGTCGGCTTTGGGGGGGATG  
TTGTGAACGCTGCCGGGTGGGTCTCACTTCCCGTGACCGTCGGAGCCCATCCACGAACCTCAACAGTTTG  
GACCAAATTTTGTATCGTGGACAAGCCGTCGCCCTATAACGCGATCATGGGTCGACCCACGATGGCGGCC  
CTCAAGGCCGCTATTACCATACCACGATCGATGAAATTCCCCACGGAGGGAGGTGTGGGAGTAGTGA  
AGGGTGACCAAGAGTCTCTCGGTTTTGTGCTCGGAGGGCGTTAGAGAAAAAGAAATAG

>GWHPAAAL015755

ATGGAATTAATAATCCCCAGCAACGGCCGAAAGCTTCACATAGCCATGTTCCCATGGTTAGCTTTCGGAC  
ACTTGATCCCTTTCTTAGAGCTGGCCAAGCTCATAGCCCAAAAGGGTCACCAAATCTCCTTCATTTCCAC  
ACCCCAAAACGTCCACCGCCTCCCAAACTCCCTCCAAATCTCACTCCCCTCATAAATTCGTTCAAATC  
CCACTGCCGGCCGTCGAAAACCTCCCGGACGGAGCAGAAGCCACCATCGATGTTCCCTACGATAAAGTCA  
AATACCTGAAAATCGCCTATGACGGCCTCCAAGAACCATCACCAAGTTTCTTCATTATTCATCTCCGGA  
TTGGATAATTTTCGATTTTCGCTTCTTATTGGGTAGGCCCGGTAGCCTCTGAACTCGAAGTTTCCTCTGCT  
TTTTTCAGTATTTTCACGGCCGCTTTCATGGGTTTCTGCGGGCCCGCAGAAATCTAAAGGGGACTGTGG  
AAGGACGCACCAAAACCGGAGGACTTCATCGTCAAGCCGAATTGGGTGCCATTCGAATCGAGGGTTGCGTT  
CCGGCTGTTTGAGATTTTTCGAGTTTTTGCGAGTTTTTGACGGCGTAACAGGGGATGAAGACAACGTATCGGATGGGTTG  
CGGATGGGTTGCACAATAGAGGGCTGCGATTTAATCATCATCAGGAGTTGTTATGAGTTCGAGTCCGATT  
GGTTAAGGGTCATTGAAGAGATTACCGAAAACCGCTAATTCCGGTGGGTCAGCTGCCGACCACCGTCTA  
TGATGGCGGAGACGTTGACAAAAGACGGCGCGTGGAGAGAAATCAAGGATTGGTTCGACCAGCAGGAAAAA  
GGATCAGTGGTTTATGTTGCGTTTCGGAAGCGAGGCGAAACCCAGTCAAACCGAACTCACAGAGATAGCTC  
TGGGTTTGGAGGTATCCGGGTTGCCTTTCTTCTGGGTTTTGAGAAAGCAACGAGGATCAGCCGACATCGA  
GTTGACGCAGTTGCCGAAGGGTTCGAAGGGAGAACCAGAGGGCGCGGAATCGTGTGCACCACTTGGGCT  
CCGCAGTTGAAAATACTGAATCATGTCTCGGTGGGGGGGTTCTTGACTCACTCCGGGTGGAGTTCGGTGG  
TGGAGGCCATTTCTCTCGAGAAGGCACCTATTTTGCTGACGTTCTTAGCAGACCAAGGACCGAATGCTAG  
GCTTCTGGAGGAGAAGAAGATGGGTACTCAGTACCCAGAGACGAGCGAGACGGTTCGTTCTCGAGAGAC  
TCGGTGGCTGACGCACTGAGGTTGGTGATGGCGAGCGAAGAAGGGAAGATTTACAGAGACAAGGTCAAGG  
AAATGAAATGGGCGTTTCGGAGACAGGGATTTACAGGACCGTTATGTTACAATTTATTGGGTATCTTCA  
AACTCATAATAGGAAGAAGGGGAGATGA

>GWHPAAAL016884

ATGGCAGCATCAACTTTCCACATAGCAATGTACCCCTGGTTTGCTCTTGCCACCTCACCGCTTTCCTCC  
ACCTATCCAACAACTAGCCAAAAAGGGTCACAAAATCTCCTTCCTCATCCCCACCAAAACACAGCCCAA  
ATTAACCTTTCAACCTCTACCCCAACCTCATCACCTTCATCCCAATCACCATTCTCATGTGGACGGC  
CTTCTCTGGCGCCGAGACCACTTCCGACATCCCGTATCTATCAGGGACACATCTCATGACAGCCATGG  
ACCAGACTCAAGCCCATATCGAACTCCTCCTCCGTGACTTAAAGTGAGACATTGTCATCTTCGATTTTGC  
TACTGGATACCGGCAGTTGCAAAGTGGTTAGGGATCAAGTCGATTCACTACTGCACCATCAGTCCAGCT  
ACAGTAGCTTACACGATGGTACCGGCTAGAAATCTTAAAGGAAACAAAGTAACGGAAACTGACTTGATGC  
AGCCGCCAGAAGGATACCCAGTTTCATCGATCAAGCTTCATGCTCACGAGGCACCTGCGTTCGTTGCTCG  
GAGAAGTATGAGATTCGGGGGCGACAAGCAATTCTATGAGCGACAATTCCTCAGTTTCAGCCAATGCGAC  
GCGTTGGGTTTCAGGGCATGTAGAGAAATCGAGGGCCAATTTTGTGACTACATTGAAAGCCAATTCAGAA  
AGTCAGTGCTGCTTTCAGGACCTGTTATACCAGAGCCGCCGACATCTCCTTTGGAAGAAAAATGGGTCAA  
ATGGCTAGGCAAAATTCGAGGCAGGAACAGTTGTTTACTGCACATTCGGGAGCGAATGCACCTTGAAGAAA  
GACCAATTCGAAGAACTGGTGCTGGGTTTGGAGCTCGCCGAAAAACCGTTTCCTGGCAGCACTTAAACCAC  
CTGCCGGAGTTGAATCTACAGAAGCAGCATTGCCAGAGAACTTCAAGGAGAGAGTTCAAGGGCGAGGGAT

AGTTCACGGGGGATGGGTTCTGAGCAACAACTGATTCTGGAACACCCTTCGGTTGGGTGCTTCATTACACAC  
TGTGGGTCGGGTCTGTGTCTGAAGCACTGGTGAATAAGTGTGAGATGGTGTATTACCACACGTAGGTG  
ACCAGATTATTAACGCGAGGATGATGAGTCGGGATCTAAAGGTGGGCGTGGAAGTAGAGAAAGGAGAAGA  
AGATGGGGTATTACGAGGGAGAGCGTGTGCAGAGCTGTGAGGGCCGCAATGGAAGAAGGAAGTGAGGTT  
GGAAAAGAGATCAGAGCCAACCAACGCCAAGCTGAGAGAATTCTTGTGACAAAAGACTTGGAATCCTCTT  
ACATTGAAAATTTCTTATGAAACTCCAAGAATTACTACAATGA

>GWHPAAAL016885

ATGGCAGCATCAAGTTTCCACATAGCAATGTACCCCTGGTTTGCCCTCGGCCACCTTACCCCTTTCTCC  
ACCTCTCCAACAACTAGCCAAAAAGGGTCACAGAATCTCCTTCCTCATCCCCACCAAAACACAGCACAA  
ACTAAACCCTTCAACCTCCACCCGACCTCATCACCTTCATTCCGATCACAGTCCCTCACGTCGACGGC  
CTTCTCTGGGGCCGAAACCACTTCCGACACCCCTCCCCAATCTCTCACACACCTCATGACCGCCATGG  
ACCAAAACCAACACCACATTGAACACCTCCTCCGTGACTTAAACCGGACGTCGTCTTCTTTGATTTAC  
ATACTGGATACCAGAAGTAGCAAAGCGGTTGGGGATCAAGTCGATTCACTACTGCATCATCAGTCCGGCC  
ACAATAGGATACACGATGGTACCCACGAGAAATCTCAAAAGGAAAAACGAAGTGATGGAAATTGACATGA  
TGCGGCCACCGGAAGGGTACCCGGCTTCGTCGATCGAGCTTCATGCTCACGAGGCACGGGCGTTTGTAGC  
TCGTCGAGACGTGTAGCGAAATCGAGGGCAATTTTGTGACTACATTGAAAGCCAATTCGGAAGNACA  
TCTCCTTTGGAAGAAAAATGGGTCAAATGGCTAGGCAAATTCGAGGCAGGTACAGTTGTTTACTGCGCAT  
TCGGGAGCGAATGCACCTTGAAGAAAGACCAATTCCAAGAAGTGGTTCTGGGTTTGAGCTCGCCGAAA  
ACCATTCCTGGCAGCCCTTAAACACCTGCCGGAGTTGAATCTACAGAAGCGGCATTGCCAGAGAACTTC  
AAGGAGAGAGTTCAAGGGCGAGGGGTAGTTTCATGGGGGATGGGTTCTGCAACAACCTCATTCTGGAACACC  
CTTCGGTTGGGTGCTTCATTACACACTGTGGGTGCGGTTCTTTGTCTGAAGCACTGGTGAATAAGTGCA  
GCTGGTGTATTACCACACGTAGGTGACCAGATTATTAACGCGAGGTTGATGAGTCGGGATCTAAAGGTG  
GGCGTGGAAGTAGAGAAAGGAGAAGAAGATGGGGTATTACGAAGGAGAGCGTGTGCAGAGCTGTGAGGG  
CCGCAATGGAAGAAGGAAGTGAGGTTGGAAGAGATCAGAGCCAACCAACGCCAAGCTGAGAGAATTCTT  
GTTGCACAAAGACTTGGAATCCTCTTACATTGATAATTTCTTATGAAACTCCAAGAATTACCACAATGA

>GWHPAAAL017403

ATGGAGAGAGAAATAGATGAAATGGGTAGCCAAAAACCTCATGTTCTGGTAGTCCCATTTCAGCACAAAG  
GTCACCTCAGTCCAGCGCTGCAACTCTCCAAACGCTTAGCCTCGAAAGGGATTAGGGTCACCTTCGTCAC  
CACCATTAGCAGCGCCGAGTCCAGTGGCTCCATTAGGATGGAGCACATTAGCGACGGCTATGAAGAAGGT  
GAAAAACAGAGAGCATTGAAGCCTTTACCGACCGCATCAAACTGTGTTCTCGCAAAACCTTGCGGATC  
TAATTGAGAAGCAAAAGCGAGTCGGTTACCCAGTCAAGCTTCTAATTTATGATTCTGTGATTCCATGGGC  
ACTAGAGATAGCACACAGTTTAGGGGTTTATGGAGCTCCATTCTTCACTCAAACCTGTGCTGTCTGTGCT  
ATCTACTACCATGCGCAAAAGGGAATCTGGAGGTTCTCTTGAAGGAACCAAAATCTCACTACCTTCGT  
TGCCACCATTGGAGAGAAATGATCTTCCATCTTTCTTTCTGACATGAACTCCTATCAATTTTCTTGAA  
AATGGTCTTGCCCAATTCTCAAATTTTCAAAACGCAGATTGGATCTTATTCAACACCTTCGACAAGCTG  
GAAGATGAGATAGTGAAGTGATGGCAAGCCAATGGCTATCAGAACCGTCGGACCAACTATTCCATCCA  
TGTAATTTAGACAAGCGACTGAAAGAAGACAAAGAATATGGCCTCAGCCTCTTCACTCCAAACATCGAGTC  
TAGCATGAAGTGGCTGGACTCTAAGGAACCAGGTTCCGGTGGTTTATATCTCGTTTGGGAGCTTGCCAAAC  
CTTGACGAAGGTCAAATGAAGGAACATCATGGGGCCTTGTGAAGAGCAACTATTACTACCTGTGGGTGG  
TCAGAGATTCCGAAGAGAGCAAGCTTCCCAACAATTCATGGCTGAGACTTCAGAGAAAGGGCTCGTGGT  
CAGTTGGTGCCCTCAGCTTGAGGTCTTGCTCACCAGGCAGTGGGGTGTTCGTAACCTCATTGTGGTTGG  
AACTCGATGCTTGAAGCTTTGTGCCTCGGGGTGCCAATGGTTGCAATGCCCCAGTGGACTGATCAAACGA  
CGAATGCAAGTTTGTGGCCGATGTGTGGAGGGCAGGGGTTTCAGTGGAGGCCAATGATGAGGGGGTTGT  
CACGAGAGAAGAAATTGAGAAACGAATCAGAGAAGTCATGGAGGGAGAAACAAGGAAGAAGTGAAGAAAG

AATGCTAGCAATTGAAAAACCTAGCGAGAGAGGCAGTGGATGAAGAAGCAGTAATTTTCCCAGCAAATC  
CTTCTCAGAAAAACAATCCCATGACCCAATTCTCCAAGTGTTTAGCCACCACTGGCCACCGCCTTGCGGT  
CACCTAGTCAACACCACCGCCACCAAATTCTCCTACCTATCCCAACCACCTAGCTCCATCTCTATCGAA  
CGGATGTATCTAATGATGATCAACTAG

>GWHPAAAL017405

ATGGAGATAACGGATAGAGAAACAGGGTCGTCCCAAAATCGCGTCCTGGTTATTCCATTGCCAGTCCAAG  
GCCACATAAATCCCATGCTCCAATTCTCCAAGCGCTTAGCCGCCAAAGACCGCCACTGCCGCCTTGCGGT  
CACCTAGTCACTACTACCGCTACCAAATTCTTCGCCCTATCCCAACCACCTAACACCATCTCTATTGAA  
TCTCTACCCGATGACTCCGACGATGATCAACTGGTTGACACGGTAGCCCTCATCCGGCGTTTCGTAAAGA  
CAGTCAACGAGGGACTGCCGAGGCTAGTGAGAGACTGAAAACTCCGGCAGCCCCGTAAGAGTGGTGGT  
CTATGATTCTTCATTCCGTGGGTCTAGACATAGCCCATCAGCTGGGCTTGAAAGGGGCTTGCTTCTTC  
ACTCAGACCTGTGCGGTGTCCGCTGTCTACTACCACGTGCACCAAGGAACACTCACAGTTCCTTCTGAAG  
AAGAGCAAGACCATCGATCATCTGTGACGCTGCCTGGGATGCCGTTGATGGAGATCAACGATCTTCTTC  
TTTTGTCTACGTCGTCTACGACCAGTATCCTGCTGCCTTGAGGTTCTTCTTGCTCAGTTCCTCAACGCC  
GGGAAAGCAGATTGGATCCTTTTCAACACTTTCGACAAGCTAGAACATGAGGTGATAGAAAATTGGGCGG  
CAAGAGAATGGCCAAGAATGAAGAGCATTGGACCAACAATTCCATCTGCATACTTGAAGAAGAAGATAA  
AACACTCCAAAACGACAAAGATTATGGGCTTAATCTCCTAGACCCAAACATCGAAGCCTGCATGAATTGG  
CTGGACGCCAAGGAAACCGCATCAGTTGCCTACGTGTCGTTACGACAGCGTAGCCGACCTCAAAAAAGAGC  
AAATGGAGGAACTAGCTTGGGGCTTAATAGGTAGCGGAACCCACTTCTTGTGGGTCGTCAGAGCTTCCGA  
AGAAAGCAAACCTCCACCCAATTTACCGATCAGGCTTTAGAAAACGGCCTAATAGTGAATTGGTGTCCC  
CAACTCCGAGTTTGGCTCACCGGGCGGTTGGGTGTTTCGTGACACACTGCGGTTGGAACTCGACGCTGG  
AAGCACTAAGTCTTGGGGTCCGCTAGTGGCGATGCCTCAGTGGTCCGATCAGACGACAAATGCGAAGTA  
TGTTTCCGATGTTTGAAAGTCGGGGTTCGGGCAAGAAGGGTCGAGAAAGGGGAAGGAGTTGTGGGGAGG  
GAGGAAATAGAGAGGTGCGTTAAGGAAGTTATGGAGGGAGAGAGCGGGGATGAGGTGAGGAGGAATGCTG  
TTAGGTGGAAGGAGTTGGCTAGAGAGGCTGTGGCTGCAGGGGAAGCTCTGATAACAATATTCAAGAATT  
TGTTTCTCAACTTGTTAAACTATGA

>GWHPAAAL017961

ATGGAAACAAGAAGAGGTCCGAAAGAGGTGGTGTTAGTCCCCTATCCAGCACAAGGCCACATGAGCCCCA  
TGCTCCAACCTCGGCACCCTCCTCCATTCCCTTGGCTTCTCCATCACCGTCGCCTACGCCAGCCTCAACTC  
GCCGGACCCGTCGACCCACCCTGAGTTTGATTTCCTACCCATATCGGAGGACTTGTGCGATCGAGACACC  
TCATCCGGGGCGGTGTTCTCCCTCATCAGAGTCTCAACGCCGACTGCGCAGAGCCACTCCGGAATGTT  
TGGTTCGGGTGACGGAGGATCGGGGAGCAGTCGCCTGCGTGGTGTACGACTCGCTCATATATTTTCCGA  
GGAGGTGGCGCACCGGATGAAGATCCCCAGCATGGTGTGACAGCGTGTAGCGCTGCTTATGTGTTGGCT  
TGCCGGCTTTTTCCCAGCTCAAGGAAGAAGGCTATCTCCTGCTGAATCTGAAGATCCTTCAATGGAGG  
ACCTTGTGCCGAAGCTTCATCCCCTCAGATTCAAGGATTTACCCATTACTAAATTCGACACAACCGCCCT  
ACAAATACTCATGGATCTAAACGACGTTGGCAGCTCTCCGCAGTCATCTGGAACACCACCGACTACCTC  
GAGCACCCCTCCTTATGCCGACTCCGGCAGCATTACCAAGTACCCATCTTCCCGTTAGGCCCTTGCAAG  
CAATGGCTCCACCTCTTCCACCAGCTTCCTTAAAGAGGAAAACGGTTGTCTAAATTGGCTCGAAAACCA  
GGCACCAAAATCGGTTATTTATGTGAGTTTCGGAAGCAACGCGACAATGGAGCCAAAAGAGCTGAGCGAG  
GTGGCTGCGGTTTAGCCAATAGCGACCAACCATTTTATGGGTGGTTAGACCTGGTTTCGGTTAAAGGT  
CGAAATGGGTGGAGCACTTGCCGAGGGGTTTATAGAGGCTGTGGGAGAGAGAGGTGTATCGTGAAGTG  
GGCTCCACAGAAGAAAGTGTGGCGCATGGGGCGGTGGGAGGATTCTGGAGTCATTGCGGCTGGAATTG  
AGCTTGGAGGGTCTTTCCGAAGGGTTACCGATGATTTCAGGCCGTGTTTGGTGATCAGAGAGCAAAATG  
CTAGGTATTTGGCTCATGTTTGAGGGTGGGATTGGAATTGGAACCTGAATTGGAGAGAGGAGCCATTGA

AAGAGCTGTGAGAAGGCTTATGACGGGTAAAGAAGGGGAAGAATTAAAGAGGAGGGCGATGGATATGAAG  
CAAAACATTGAAGAAAGTGTGCAGAAAGATGGATCTTCTTACAATTCCTGATTGAGTTGGCAGATTTCA  
TCTCTGATTTTACAAGACACGGCAATGTGTTTAA

>GWHPAAAL018171

ATGGGTAAGCAGCTTCATGTTGTCTTCTTCCCGTTCATGGCGCACGGCCACATGATTCCGACGCTGGACA  
TGGCCAAGCTCTTCTCCTCCAGGGGTGTCAAAACCACCATCATCACCACCCCTCTCAACGCCCTGTTTT  
CTCCAAATCAATCCAGAGGTCCAACCAATTGGGTCTCGATATCAGCTTAAAAATCTTTGATTTCCGGCG  
GTTGCCGCCGGCTTGCCGGAAGGATGCGAGAGCGCTGACCAATCACCTCCGAGGACATGTTGCCAAAT  
TCTTCGTCGCCACGGCGTTGCTCCGGGAGCCGCTGGAGCGGCTGCTGAGTGACCACGCCCGGATTGTTT  
AATCGCCGGCATGTTTTTCCCTTGGACGACGGAGTCGGCGGCGAAATTCGGCATTCCAAGGTTGGTTTTTC  
CACGGGACCAGTTTCTTCGCGCTCTGCGCCGGGAGTCTCTGAGGACGCACAAGCCTTTCCGGCAAGTCA  
CGTCGGATTCCGAACCCTTTGTCTGCCAGAGCTCCCGCACGAGATAAAGCTGACGAGAACGGAGGTGTC  
GCCGTTTGAGCTGCACGATACCGAAACGGCCATATCCGGAGTCTTGAAACAAGTGAGCGAGTCGGAGAAA  
ACTTGTTATGGCATTATCGAAACACCTTCTATGCACTCGAACCAGATTACGCCGATCACTACAGAAACG  
CCATGGGGAGAACGGCGTGGCACGTTCGGACCTCTCTCTCTCTGCAACAGAGGAATCGAAGACAAAGCAGA  
GAGAGGAAAAAATCTTCCATCGACGAACACGAATGTCTTCAATGGCTTGATTCAAAGAAACCCAAATCC  
GTCTCTACGTCTGTTTTCGGAAGCATGGCCAAATTCGCCGATTCCCAACTGTACGAAATCGCCGCCGGTC  
TTGAATCCTCCGGCCAACAGTTCATCTGGGTGGTGAGAAAATCAAAAGACGAAGAAGAACAGAAGGAAGA  
GACATGGCTGCCCCATGGATTTCGAGGAGAGAACTCAGGGGAAGGGCCTGATCGTCAGAGGGTGGGCCCC  
CAGATGTTGATTCTCGACCAGGAAGCAATCGGCGGATTCTGTGACTCACTGCGGCTGGAATCCACGCTGG  
AGGGAGCCTGCGCCGGAATTCCGATGGTGACTTGGCCGGCGTTCGCAGAGCAATTCTACAACGAGAAGCT  
GGTGACGGATGTTCTGAAGATCGGGGTTTCCGTTCGGAGCTAAAGAGTGGAACACAGGGCCGAGGGAGGGG  
GTGAAGAGGGAGGCAATCGAGAAGGCGGTGAGGAGCGTAATGGAGGGAGAAAAAGCGGAGGAAATGAGGA  
GGAGAGCGGCGCGCTGAAGGAGGCGCCATGGAAGCTGTTGAAGAAGGTGGATCTTCATACTCTGATTT  
GACTTCTCTCATTGAGGAGTTGACTTCAAGCCAAAAGATAAATGGAACATAA

>GWHPAAAL018716

ATGGAGATGGAGATGGAGAAGAGAGAGTACAGAGCCCATGTCCTGGCAATTCCATTTCCGGCACCCAGGCC  
ATGTTAACCACCTTCTCCAATTCTGCAAGCGCTGGAATTCAAGGGCTTGAAGGCGAGTCTCGCCATCAC  
CAAATTCAGTCCAAATCCATGCAATCCAGACTCGGGTCGATCCAGATCCACACGATCTCCGACGGGTAC  
GATGAGATTGGACGGCACAACGCGGAGAGCGTCGGCGTATGGATCTCGACCTTCAAGGAAGTAGGTTCGA  
AATCCGTGGCAATCTCATCCAAAAGTTTCGGAGCTTGGGTATCCGATCGATTGCATCGTCTACGATTC  
GTTTCTCCCTTGGGTTCTGGATGTCGCCAAGGAGAACGGAGTTGCCGGAGCTTCGTTTCATGACCCACAAG  
TGTGCGGTGAATCACATCAACTATCATGTCTACCATAAGAAGATCCCCTACCCCTTTTCTTCTCCGACGT  
ACTCGATTCCGGGATTACCGTCGCTCGATCTCGAGTACATGCCCGGATTTATGCACGTCCACCCCGATTA  
CTACGACCTGGTTCTCAGCCAATTCTCGACTGTGGATCGCGCTGATTACGTGTTTGTCAATACTTTCTAC  
AAATTGGAGGCTGAGGTATTGGATGAAATGTCAAAGACCCTTCCAGTGAAACCAATAGGACCAACAGTCC  
CATCTTTCTACTTGGACAACAGGGTTGAAGATGACAAAACTATGGGCTCAACCTCCAACAACTGGACTC  
GTCGGTTTGCCTCAATTGGCTCAGCTCTAAGCCTGCAAGGTGCGTGGTTTACGTGTCGTTTGGCAGCGTG  
GCCACCGCCAGTCCAGCAGCCAACGAAATGGAGGAGATAGCGTGGGGGTTGAAGAACAGCAATTGCTACT  
TCCTGTGGGTGGTGAATGCTAACGAAGAGCCGAATCTCCCCAGAATTTCAAGGAGGAGATGTCCGAAAA  
AGGGTTGATTGTGGCGTGGAGTCCCCAGCTGGAGGTACTATCGCACCATTCCGTTGGTTGCTTCTCACT  
CACTGCGGGTGAATTCAACCATCGAAGCTATTTGTCTGGGCGTTCCGATGGTGGCTGTGCCCAAATGGG  
CGGATCAAACCACCAACTCGAAGTTCATACAGGATGTTTGAAAGTTGGGGTCAAAGTGATGCCATCTGA  
AAACGGGATTGCTAGAAGAGAAGAGATTGAGCGGTGTATTAATGTT

>GWHPAAAL019177

ATGGACCACCACCGCCGCCACCACCTTCCTCCTTATCTCTCTCCCTGCCCAAGGCCACTTCAACCCCA  
CTCTCCAGCTCGCCAAAGTCCTTGACGCGCCGGCGTTACTGTTACCTTCGCCACCACCGTCTACGGCCT  
AAACCAGCTAAAGGTTAACTCATTACCGTCGACGGCATAGCCTACGCCTCCTTCTCCGATGGTCACGAC  
GAAGACCGCTCCAAAGCTAGCAGCGACTTTGCCGGCTACCTGGAGGATCAAAGGCGCGTGGGGTCCCAAA  
ACCTGATAAACTCCTCGAAAACCTCGCCAACGACGGCCGTCCCGTTACCTTCATAGTCTACACCGTTCT  
CCTTCCATGGGTTGCCAGGTGGCCCGTGAGATGCACGTGCCGTCCGCATTCTTCGCCATACAGTGTGCC  
GCCACTTTGGCCGTCTATCACCGCTTCTTCAACAGCAGCGACGGACTCCTCGGCGGCGAAAACGAAATCA  
ACGAGTCGCTTTCCGTTGAATTACCTGGACTGCCGCCGTGAGCTCCGGCGAGATCCCTTCATTTCTAAT  
GCCGGCCGATCAGTATCATTCTGTAGTCCGTCTTTCGAGAACACATACTCACCTCGAAGAAGAT  
CCAAATCCGACGGTTCTGATCAACACCTTCGATGCCTTAGAGGAAGATTCAATCAGAGCCGTCGGAATA  
TGAAGATCATCGCCGTCCGCCCTTAGTTCCTTCGGCCTTCTCCGACGGAATCGACGGGTCGGACAAATC  
ATTCCGCTCGCATCTGTTTCGAAACTCCGACGACCATCACCTCCGGTGGCTCGATTGAAATCGGAATCC  
TCCGTCATCTACGTTTCCTTCGGGAGCCTAGCCATTCTTGGGAAACCCAGAAGGAAGAGATCCTGAACG  
GACTGATCGACACCGAGAGACCTTTCTCTGGGTCATCCGCGACACCGCCGAGAAGAAGAAGAGATGGC  
GGTGCCGAAAATGGACTGGTGGTGCCTTGGTGTACGAGGTGGAGGTGCTCGCCATTATCGATAGGG  
TGCTTCGTACCCACTGCGGGTGGAATTCGACGATAGAGAGCCTGGTCGCCGAGATTCCGGTGGTGGCGA  
TGCCGCAATTCTCCGACCAGTTGACGAACGCGAAGCTGGTGGAGGAGGTGTGGGGGAATGGGGTTAGAGC  
GAGAAAGAGTGAAGAGAAGGGGGTTGTAGAGAGAGAGGAAATCAGGAGGTGTGTGGAGGTGGTGGGG  
GGAGGAGAGAGGGGAGAGAGATAAGAGGAAGTGCTCGGAAATGGAGAGGTCTGGCCATGGCTGCCGTCA  
GGGAGGGGGTTCTTCAAGCAAAAATCTTAGAGATTTTTTGGATAGCTTGGGATAA

>GWHPAAAL019178

ATGGACCACCACCGCCGCCCGCCTCCACCACCTTCCTCCTCATCTCTCTCCCTGCCCAAGGCCACATCA  
ACCCCACTCTACAGTTCGCCAAAGTCCTCGACGCGCCGGCGTCACTGTACCTTCGCCACCACCGTCTA  
CGGCCTTAGCCAGCTTAAGGCTAACTCATCCACCGTCGACGGCATAGCCTACACCTCCTTCTCCGACGGT  
TACGACGAAGCGGTGCCAAAGCAAACATCATCTTCCCGACTACATGGAGGATCTAAAGCGCTGGGGT  
CCCCAAACCTGATAAACTCCTCAAAAACCTCGCCGGCGAGGGTCGTCCCGTCACCTTCTTAGTCTACAC  
GGTCTCTGTCCCTGGGTGGCCATGTGGCTCGGGAGATGCACGTGCCGTCCGCATTCTTCGCCATACAG  
TGTGCCGCCACTTTGGCCGTCTATCACCGCTTCTTCAACAGCAGCGACGGACTCCTCGGCGGCGAAAACG  
AAATCAACGAGTCGCTTTCCGTCGACTTACCTGGACTGCCGCCGTGAGCTCCGGCGAGATCCCTTCATT  
TCTAATGCCGGCAATCAGTATCATTCTATTAGTCCGTCTATCCGAGAACACATACTCACCTCGAA  
GAAGATCCAAATCCGACGGTTCTGATCAACACCTTCGATGCCTTAGAGGAAGATTCAATCAGAGCCGTCC  
GGAATATGAAGATCATCGCCATCGGCCCCCTAGTTCGGTCGGCCTTCTCCGACGGAATCGACTCGTCGGA  
CAATCATTCCGGTGCATCTGTTTCGAAACTCCGGCGACCATTACCTCCGATGGCTGGATTGAAATCG  
GAATCCTCCGTGATCTATGTTTCCTTCGGGAGCCTAGCCGTCTTGGGAAACCCAGAAGCAAGAGATCC  
TGAACGACTGATCGACACCGGGAGACCTTTCCTTTGGGTTCATCCGCGACACCGCCGAGAAGAAGA  
AGAAGAAGAGACGGCAGTGCCGGAATGGACTGGTGGTGCCATGGTGTACGAGGTGGAGGTGCTGGCC  
CATTCTCGATCGGGTGTCTCGTCACCCACTGCGGGTGGAATTCGACGATGGAGAGCCTGGTCGCCGGAG  
TTCCGGTGGTGGCGATGCCGCAATTCTCCGACCAGTTGACGAACGCGAAGCTGGTGGAGGAGGTGTGGGG  
GAATGGGGTTAGAGCGAGAAAGAGTGAAGAGAAGGGGGTTGTAGAGAGAGAGGAAATCAGGAGGTGTGTG  
GAGGTGGTGGTGGGGGAGGAGAGAGGGGAGAGATAAGAGGAAGTGCTCGGAAATGGAGAGGTCTGG  
CCATGGCTGCCGTACGGAGGGGGGTCTTCAAGCAAAAATCTTAGAGAATTTTTGGATAGCTTGGGATA

A

>GWHPAAAL020336

ATGTTTACCAGTAACAGAGTAGAGCTCGTGTTTCATCCCTTCGCCGGGAATGGGCCACCTCGTCTCCGCCG  
TCGAGATGGCCAAGCTTCTCGTCGATCGAGACCAACGTCTCTCCATCACCATCCTCATCATGAAAGTACC  
CTCCAAAACCAAGGCCAATTACTCGCCGTCCCAATCCCTTTCCACTGCCGCCGCTCACGTATACGGTTC  
GTAGACCTTCCCGAATCAGAATCCACCCCCAATTCTCCCGCAATCCTTCATTTCCGGCTTCATCCCCA  
GTCAGAAGACCCGCGTTAGGGACGCCGTGCCAAAATCGCCGCTGCTCCGGGAGCTCACAGACTCGCCGG  
TTTCTTCATCGACATGTTCTGTACTTCGATGACCGACGTCGCCGACGAGTTTGGCGTCCCGACTTACGTG  
TTCTTCACCTCCGGCGCCGGCTTATTGGGACTGATGTTCCATCTCCAAACCATGAGAGATGACTACAATC  
ATGACATCACCGAATTGATGGACTCGGACACTGACTTAATAGTCCCGAGTTGGATCAAACCTGTCGCCGT  
TAAATTCCTACCATCTGTATTTGTCAACAAGGAAGAAGGGTCCCACATGTTCCTTGATCTCACCCGTCGG  
ATCATGAAGACAAAAGGTATCGTGATCAACACATTCTTCGAGCTGGAATCACAGGCAATCAATTCCCTTA  
ACACCTGCCGTATATCCAGTCGGACCCATCCTGAACGTCGCCGGCGACAACAACTCCGCTTCTGCTGG  
CGCAATCATGAAGTGGCTCGACAGTCAACCCCTTCGTCGGTGGTTTTCTATGCTTCGGAAGCATGGGA  
TGCTTCGACGTTGACCAAGTGAAGGAGATTGCATGTGCCCTAGAACACAGTGGTCATCGCTTCTTGTGGT  
CTCTTCGACGACCACCGTCAAATGAAACGTCAGAGTTACCGGAGGAGTACACAAATCTCGAAGAAGTCTT  
TCCAGAAGGATTCCTAGAACGAACGACCAAGATAGGGAAAGTGATCGGGTGGGCGCCACAGACGGCAATA  
TTGTCCACAGGGCAGTGGGAGGGTTTGTATCGCACTGCGGGTGGAACTCGACGCTGGAGAGCGTGTGGT  
ACGGCGTCCCACTGGCAACATGGCCACTGTTTGCAGGAGCAACAAGTGAACGCATTTATGATGGTGAAGA  
GTTGGAGATGGCAGTGGAGATTAAGATGGATTATCATAAGTCATTTTACTTGAAAAATGGAATAGTTTTG  
AAGAGCGAAGAGATAGAGAAGGAATACGGCGGTTGATGGAGAGCGGTGACATTGAGATCAGGCAAAAGG  
TGGAACAAATGAGAGACAAGAGCCGGGTGGCGGTGAAGGAAGATGGATCTTCTTTTCGTTGATTGAGCG  
TTTGATCGAGGATGTAATCAATGGAGCAAAAATGAAATAA

>GWHPAAAL020411

ATGGTCATCCCAGACTTTCTCATTGTTGAAGATAACAACAGCTCTGAAGCTCTGAGCTGGGTTGATTCAT  
GTACCGGTGATGGGTATGGTGGCCAAATGCACCATGAAAGCAGCGAATCCAATTGGGAGTGGAGCCAAAG  
CCTGCCCTCGAAAACACTGAAAGGGATTCATGGCGAAGAAGACGGGTGTAGACAAGCATGAAAGTTCCAAA  
CAGTCCAATAACACCATACTGATCAAGAGCTTCAAGGAAATTGAAGGTAAGTACTATGATTATCACTCTC  
TTTTGGCCAAGAAAAAGTTTGTCCCTGTGCGCCAGTGGTTCAGGAACCTGTCTGTGAAGAAGGGTTTTCT  
TAAGATCAATGAATGGCTAAACAAAAAGATTACGGTTCAACTGTGCTCGTCTCATTGAGGAGTGAATAT  
TTTCTCAAAAAAGAAGATAACATAGAAATAGCACATGGGCTTGAGCTTAGCAACGTGAATTTTATCTGGG  
TTTTAAGGTTTCCCAAAGGTGAGAACTTGTGACAAAGAACCTTTCATTAGGGTTTTCTATAGGGT  
TGGAGATAGAGGGATGGTGGTGGAGGGATGGGCGCCACAGGTAAGGATACTAGGTACCCCCAGTACCGGT  
GGATTGCTAGCCACTGTGGGTGGGGTCTGTGATTGAGAGCATGAGTTTTGGAATTCGAATTATAGCCA  
TGCCAATGCACCTTGATCAACCATCAATGCTAGGGTTGTGGAGGAAGTGGGTATTGGTGGGAGGCCAC  
CATGTACATCAGTGGAACCTGAAGAGAGAAAAATTGCGGCGGTGATCAGGGAGGTGGTGGTGGAGACAGA  
AGGGGAAGGCGTGAGGAAAAAGGCAAGAGAGATGAGGGATGA

>GWHPAAAL021381

ATGACAATACCACATGTTCTTGCAATACCATATCCAGCACAAAGTCATGTAATGCCATTCATGGAGCTCT  
CCCAGTGCCTCGTCCAGCATGGTGTGAGAGTCACATTTGTAAACACAGACTTCAATCACAAGAGGGTCAC  
AAAATCAATGTCCGAGAAAGAGAGTTTGACGGGCATGATGCATTTGGTTTCAATCCCAGATGGGTTAGAA  
CCATGGGAGGACAGAAACGATGTAGGAAAACTATTTGAATCAATCTTTCAAGTGATGCCCTCAAAGCTGG  
AGCAGCTGATAGAAAAGATCAATGCATCAGAAGGGAATAAAGCTGCGTTATTTCTGATCAGTGCCT  
GGGTGGGCTCTCGAAGTTGCAGAGAAGATGGGAATCAAGCGGTCACCTTTTGCCAGCATCAACAGCC  
ACGATGGCCTTAACAATGAACATCCCAAACTAATCGATGACGGGGTCATAAATGAAAATGGCAGGAGCT  
GCTCCTTCAGCTCATGGAATAGATACGAAATAACTCATCTGTACCATTTCTTTTCATTTTGAATTTCA



CACTGCAAGAACTCCCATCAGCAAACAGATAATTCAACTGTTACCAACCATGCCGGCCATGAACACCGCA  
AACTTCTACTGGGCTGTTTTGGCGACTTAAGCACGGAAAAAGTATTTTCAAATGATGGTGA AAAACA  
ATAAATTCCTAAAATTGGCAGACCGGGTGATTTGCAACTCAATCCACGAGCTGGAGCCTGCAGCCTTTAC  
TCTATGCCAGAGGTATTCCCAATAGGGCCACTCCCCTTGATCAATAAGGTCGGCCGTT CAGGAGCCAAC  
TTTTGGCCAGAAGACCCAACCTGTCTAAAATGGCTTGACCAACAGCCACCACAATCAGTGATTACCTTG  
CATTTGGAAGCTTCACGATTTTGGATCAAACCAATTCAGAGAACTCGCTCTTGGGCTTGA ACTCACCAA  
CAGGCCATTCCCTTGGGTTGTGCGTCCAGACATAACCGACCAGACCAAAGATCCATAACCCAGAAGGATTT  
ATACAGAGAGTAAGCGATCGGGCCCAAATTGTGGGTTGGGCCCCGCAACAGAGCATCCTAGGCCACCCTT  
CTGTGGCTTGTTTCATGAGCCACTGTGGTTGGAATTCACCATAGAGGGTGT CAGCAATGGAGTCCCTTT  
CCTATGCTGGCCCTATTTGCGCCAGCAATTTTGAATCAGCAGTATATATGTGATGTATGGAAGGTGGGA  
TTGGGTTTTGCGAGAGATGAAAGTGGGATCATTGTTCAAGATGAAATAAGGAATAAGGTGCAACTTGT  
TGGGCGATGAAAGCTTTAGAGCAAGGGCCACGGTCTTAAGGAAAAAGCTATGGAGACCGTTAAAGAAGG  
TGGTTCCTCTCACAGGAATTCAGCGATTTAATTGGATGGATGAAAGAGATCAAACATGACTAA

>GWHPAAAL021402

ATGTCTGATGTCGCCGGCCGACCGCCCCATATAGCTCTCTTCCCAGGCGCCGGCATGGGTCATCTCACCC  
CATTCTCCGGCTGGCCGCCATGCTTGCTTCCATAACTGCAAAGTCACCCTTATTGCCGTCCATCCGAC  
AGTTTCCGCCGCTGAATCTCCCAAATCTCCGCCTCTTTGCCGCCAACCACCACATCAACCGCCTTGAT  
TTTCACATTCTTCTCACAATCCGCCGGATTCCGAGGTCAATGACCCTTTCTTCGTCCAATTGCAAGCCA  
TTAGCCGCTCCGTTTCATCTCCTTGGTCCCCTCTTGTGCGGTGCATCTCCGCCAATCTCCGCCGTCTTTTC  
TGACTTCCCGGTTGCCGCCAGTATGGCTCAAATAACCGACGACCTCACCATAACCCAACTACATAGTATCG  
ACCACGTCCGCCAGATTCTTCTCTCTCATTGCCTACTTCCCTCTCTTGAACCTTCAAAACCACAATAAGT  
CCCAAATCGAAATCCCGGTATATCCCCGCTACCATTTTCAACTCTTCTCCGCCATTATTAGTCCAAA  
CAACCTCTTCACGACTGGGTTGGCAACCAATTCCAAGTACCTGCCAAAAGCAAAGGGCATATTAGTCAAT  
TCCTTTCACGGGTTGCAACCAGAAACAATCGAAGCTTTCAACAATGGCAAAATTCAGAAAATCTCCCCC  
CTCTACTCCCAATCGGTCCCTTACTTCAACCCCATGAACACATTCTCAATGCCATGAAATTCATGGCT  
AGACAAACAGGCTGAAGAGTCTGTAGTGTACGTTAGTTTCGGAAGCAGAACCGCCATGGCAAAGGAACAA  
GTAAGAGAACTGGGAGATGGGTTAGAGAGAAGCGGATGTCCATTTTGTGGGTTTTAAAACTAAAATCT  
TGGACAAAGACGAGAGTGAAGAGGTAGAAGAATTTCTGAGTAATTCATTTCTCGAGAGAACGAGGAGAAA  
GGGTGTAGTTTTGAAAGAATGGGTTAACCAGGAGAGGATACTTTCGCACCCTGCGATTGGAGGTTTTGTT  
AGTCATTGCGGTTGGAACCTCAGTGATGGAAGCGGCTAAAGAAGGGGTGCCATTTTGGCATGGCCGATAG  
GGGAGAAGATTAGAGAGGTGATGGAGGATGAGAAGTTGAGGGCAAAGGCAAGGAAGGTGGGAGAGGAGGC  
AAGGAAGGCTGTTGGAATGGTTGGTGGGAGCTCTGAAATGGTGCTGCAGGGGATCCTTCAAAGTATTGCA  
GAAACATGCCATTAG

>GWHPAAAL021780

ATGGCCTCCAAACCTCTTGTTTCATGTCTTTCTCGTCTCTTTCCCCGGCCAAGGCCACGTCAACCCACTTC  
TCCGTCTCAGCAACCTCCTCGCCTCCGGTGGCTTTTTCGTCACTTTCTCCACCACCGTCTCCTTCGGCAA  
GCAAATGCAGAGCGTGAATCCTGCCGTACCCGGTGAACCCACTCCCGTCGGCGACGGCTTCATCCGGTTC  
GAATTTCTCGACGAAGAGTTGGCCCTGGACGACCCCGTCGGAGGGACCCAAATCTGTTTTTCTATCACC  
TGGAGCTCGCCGAAAGGAGAATCTCCGCCGTTTGGTGGAGAACCAATCGTCGGAGGACGGTCGAACGCC  
GGTGTGCTGCCTCATCAACAACCCGTTTCTCCCGTGGGTTGCAGACGTGGCGGATAGCTTGGGCATTCCC  
TGTGCGATCTTGTGGGTGGAATCATGCGCCTCCTTGTGCGCTTATTACCACTACTATCACGGGCTGGTGC  
CTTTTCCAGACGGGGAGCAGCCGGAACCTCGACGTCGAAATACCCTTTTTGCCGTTGCTGAAACACCATGA  
GATCCCTAGCTATTTGCACCCCAATGATCCATGCACATTCTTGAAAAAATTAGTGTTGGGGCAATCAAG  
CGACTACCCAAGATTTTTTGTGTATTGATTGATACTTTTGAAGAGCTAGAGCCTCAAATCATTGACACG

TGTCGGATCTCATCCCGATAAGGTCTGTGCGGCCCTCTGTTGAGATACCGGAAATCGAGTTCCTGGATCAC  
CGGAGACCGTTTAAAAACCGACGACTGCATCGAATGGCTTGACTCAAAACCGCCGTCGTCGGTTCTGGTC  
ATGTCGTTCCGGAGCGTCGCCCAGGTCAAACAAGAGCAAATCGACGAAATTGCCACGACTGTTGAGCT  
CATGTGTGTCGTTCTTGTGGGTCATGACGCCGCCGATGGCAGGCTCGCCGATAAGCCGCGGATCCTGCC  
GGATGGGTTCTCTGAGAAAATGGGCGATCGCGGTAAGGTCGTAGAGTGAGTCCACAGGAGCGAGTCCTG  
GCTCACCCGTCGGTGGCCTGTCTCGTGACACACTGCGGCTGGAACACGACGGTGGAAGTGTGTCCAACG  
GGAAGCCGGTGTGGCTTTTCCTCAGTGGGGAGACCAGGTGAACAACGCCAAATTCCTTGGTCGACGTTTT  
TGGGGTTGGGATCAGAGTTTACAGGGGGGAAGACAGGGGCAGTATCGTCTCGAGGGATGAGTTTGAGAAA  
TGCGTGCGGGAGGCGATGAGTGGCCCTAAAGCGGTAGATATCAAGGAAAACGCGATGAGGTGGAAGAAGG  
TGGCGGAGGAAGCGGTGGCGGAAGGCGGCTCCTCCCGCCGAATATGTTGGATTTCATGGAAGAGATCAA  
GAGGAGGAGTGTGGATTGA

>GWHPAAAL021819

ATGGGGGAGAAGCAACCGGAGCTCCAAAAGCAACAGCGACAGGGGCTCCGATTGGTGTCTTCCCACTTC  
CATTCAAAGGCCACATCAACCCCATGCTTCAGCTCGCCGCCATTCTTCACGCCAATGGCTTCCCATCTC  
CATACTCCACACTACCTTCAACTCTCCCACCCCTTCCGACCACCCTCACTTCGACTTCACCCAATCTCC  
GTCGACGGTCTGTGCGAAACAGATTCTCCGACGCCGGATCTGGTTGATCTCCTCGAACTACTCAACCAAC  
GATGCGCGGCGCCGTTCCGCGATTGCCTGGAGAAGTTGACATCGGAGGAGCCCGTCGCCTGTTTGATCTC  
GGACGCCATTCTGCATTGCACCGCCACCGTCGCTGACAGTCTTCGTATTCCAAGGATCGTACTGAGGACC  
GGCGGGGTCGCCTCCTTTCTTGCCTTTGCCTCCTTTCCACTTCTTCTGGATAAGGGTTATCTTCCCATT  
AAGAATCGAGGCTTGAAGAGGCAGTTCAGAGCTTCCTCCACTGAGAATCAAAGATCTTCCGGTGATCAA  
TACCGGCAAACCGGAGGCCCTATATCATCTTCTAGCAGAGATGATCAAGACGGCCAAGAATCCTCAGGC  
CTCATCTGGAACACCTTCGACGAACCTGAACAGCCGGAATTATCCAAACTCCGGCGTGAATCCCCATCC  
CAATCTTCCCAATCGGCCCTTTTCAGAAACACCTCCTCCTAACTTCCACACAGGAAGACCGGAGTTCTTC  
CATCTCTTGGCTTCAAAATCAACCCCCAAGCTCCGTCATCTACGTGAGCTTCGGCACCATTGCGTCAATG  
GAGGAATCCCAATTCACGGAGATAGCCCATGGACTCGCCGACAGTCTCCATCCCTTCTGTGGGTGGTCC  
GGCCAGGTCTAATCCGTGGCTCGGAATGGCTCAAGAATTTGCCGGATGGGTTCTTGAGAGGCTGGAAGG  
AAGAGGGAAGATCGTGAAGTGGGCTCCACAGGCAGAGGTGTTGGCTCATCCGGCGGTGCGGCGATTCTGG  
ACTCACAGCGGGTGAATTCGACGGTGGAGAGTATCAGCGAAGGAGTTCCGATGATATGTATGCCGTGTT  
TCACGGATCAGTTGGTGAATGCCAGGTATGTGAGCCATGTTTGGGGAGTTGGGTTGACGTTGGAAGGTGG  
GATTGAGAGGGGGAAGATTGAGAGGGTGTGAGGAGAGTGTGGGTGAAGAAGGGAAGAGATGAGGAAG  
AGGATTTTGTGTATGAAGGAGAGAGTGAATGTTTGCTTGAGGAAAGGTGGATCCTCCCATCAATCTCTAC  
ACAACCTTGGTAAGTTACATCTCGTCACTCTAG

>GWHPAAAL022080

ATGACTTTTCTCTGTTATCCTTCCTTGTGCTACGTTTGGCCATCACCTGAAACACCCGGTAGCCAAA  
AACCTCATGTTCTGGTAGTCCCATTCTAGCACAAGGTCACTTTAGTCCAGCGCTGCAACTCTCCAAGCG  
CTTAGCCTCAAAGGTCTTAGGGTCACTTTGTACCACCATTAGCTGCCCCAAGTCCAATGGTTCCATT  
AGGATGGAGCAAATTAGCGATGGCTACGAACAACGTGAAAAACCAGAGAGCATTGAAGCCTTTGCCGAAG  
GTATCAAAACCGCAATCTCGCAAGGCCTACATGATCTAATGGAGAAAACAAAACAAGTCGGTTACCCTGT  
GAACTAGTTGTTTATGATTCTGGTATGCCATGGGCACTAGAGATGGTACATAAGTCGGGTGTTTATGGA  
GTTCTATTCTTCACTCAACCTGCGTTGTATGTGCCCTCTACTACCATATGCAACAAGGGACTCTGGAGG  
TTCCATTTGAAGGAACAAAAGTCACCCTACCTTCATTGCCGCCATTGGAGAAAAATGATCTGTCATCTTT  
TATCTCTAACTTGTTCACACGAATTCCTCGTGAAAGGGTTATTGGACCAATTCTCCAATATCCACAGA  
GCAAATTGGATCTTATTCAACACATTCGACAAACTGGAAAAAGAGGTAGTGAAGTGGATGGCAAGCCAGT  
GGCCTATCAGAACCGTCGGACCAACTATTCCACCCATGTATTTAGACAAACAACGAAGAGAGACAAAGA

ATACGGCCTTAGCCTCTTCACTCCAAACACCGAGGCTAGCATGAAGTGGCTGGACACGAAAGAACAAGGT  
TTAGTGGTTTATGTCTCATTTGGGAGCATGGCCATCCTTGATGAAACTCAAATGGAGGAATTATCATGGG  
GCCTCGTGCAGAGCAACAACTATTTCTTGTGGGTGATCAGAGCTTCTAAAGAGAGCAAGCTTTCCAGCAA  
GTTTCATGGCTAAGACCTTAGAGAAAGGGCTGATGGTTAATTGGTGGCCTCAACTTGAGGTTTTGGCTCAC  
CAAGCGGTGGGATGTTTTGTGGCTCACTGTGGTTGGAACCTGACGCCTGAAGCTTTGTGCCTTGGGGTGC  
CAATGGTTGCTATGCCACAGTGGGTTGATCAAACAATAATGCGAAGTTCGTGGCCGATGTGTGGGGGG  
CAGGGGTTCGAGAGGAGGCCAATGA

>GWHPAAAL022859

ATGGAGATGGAGATGGAGAAGAGAGAGTACAGAGCCCATGTCCTGGCAATTCCATTTCCGGCACCAGGCC  
ATGTTAACCCACTTCTCCAATTCTGCAAGCGCCTGGAATTCAAGGGCTTGAAGGCGAGTCTCGCCATCAC  
CAAATTCAGTCCAAATCCATGCAATCCAGACTCGGGTCGATCCAGATCCACACGATCTCCGACGGGTAC  
GATGAGATTGGACGGCACAACGCGGAGAGCGTCGGCGTATGGATCTCGACCTTCAAGGAAGTAGGTTCGA  
AATCCGTGGCGAATCTCATCAAAAAGTTTCGGAGCTTGGGTATCCGATCGATTGCATCGTCTACGATTC  
GTTTCTCCCTTGGGTTCTGGATGTGCCAAGGAGAACGGAGTTGCCGGAGCTTCGTTTCATGACCCACAAG  
TGTGCGGTGAATCACATCAACTATCATGTCTACCATAAGAAGATCCCCTACCCCTTTTCTTCTCCGACGT  
ACTCGATTCCGGGATTACCGTCGCTCGATCTCGAGTACATGCCCGGATTTATGCACGTCCACCCCGATTA  
CTACGACCTGGTTCTCAGCCAATTCTCGACTGTGGATCGCGCTGATTACGTGTTGTCAATACTTTCTAC  
AAATTGGAGGCTGAGGTATTGGATGAAATGTCAAAGACCCCTCCAGTGAAACCAATAGGACCAACAGTCC  
CATCTTTCTACTTGGACAACAGGGTTGAAGATGACAAAACTATGGGCTCAACCTCCAACAACCTGGACTC  
GTCGGTTTGCCTCAATTGGCTCAGCTCTAAGCCTGCAAGGTGCGTGGTTTACGTGTCGTTTGGCAGCGTG  
GCCACCGCCAGTCCAGCAGCCAACGAAATGGAGGAGATAGCGTGGGGGTGAAGAACAGCAATTGCTACT  
TCCTGTGGGTGGTGAATGCTAACGAAGAGCCGAATCTCCCCAGAATTTCAAGGAGGAGATGTCCGAAAA  
AGGGTTGATTGTGGCGTGGAGTCCCCAGCTGGAGGTACTATCGCACCATTCCGTTGGTTGCTTCTCACT  
CACTGCGGGTGAATTCAACCATCGAAGTATTTGTCTGGGCGTTCCGATGGTGGCTGTGCCCAAATGGG  
CGGATCAAACCACCAACTCGAAGTTCATACAGGATGTTTGAAAGTTGGGGTCAAAGTGATGCCATCTGA  
AAACGGGATTGCTAGAAGAGAAGAGATTGAGCGGTGTATTAATGTT

>GWHPAAAL023009

ATGATTCGACGCTGGACATGGCCAAGCTCTTCTCCTCCAGGGGTGTCAAAACCACCATCATCACCACCC  
CTCTCAACGCCCTGTTTTCTCCAAATCAATCCAGAGGTCCAACCAATTGGGTCTGGAAATCAGCTTAAA  
AATCTTTGATTTTCCGGCGGTTGCCGCGGCTTGCCGGAAGGTTGCGAGAGCGGTGACCAAATCACCTCC  
GAGGACATGATTCCAAAATCTTCGTCGCCACGGCGTTGCTCCGGGAGCCGCTGGAGCAGTGCTAAGTG  
ACCACCGCCCGGATTGTTTAGTCGCCGACATGTTCTTCCCTTGGACGACGGAGTCGGCGGCGAAATTCGG  
CATTCCGAGATTGCTTTTCCACGGGATCAGTTTCTTCGCGCTCTGCGCCGGGAGTCTTTGAGGACGCAC  
AAGCCTTTCCGGCAAGTCACGTGGATTCCGAACCCCTTGTCTGCCAGAGTCCCGCACGAGATAAAGC  
TGACGAGAACGGAAGTGGCGCCGTTTGACCTGTACGATACCCAAACGGCCATATCCGGAGTCTTGAAACA  
AGTGAGGGAGTCGGAGAAAACTTGTTATGGCATTATCGCAAACACCTTCTATGCACTCGAACCCGATTAC  
GCCGATCACTACAGAAACGCCATGGGGAGAACGGCGTGGCAGTCGGACCTCTCTCTCTGCAACAGAG  
GAATCGAAGACAAAGCAGAGAGAGGAAAAAAGCTTCCATCGACGGACAGCAATGTCTTCAATGGCTTGA  
TTCAAAGAAACCCAAATCCGTCCTCTACGTCTGTTTCGGAAGCATGGCCAAATTCGCCGATTCCCAACTG  
TACGAAATCGCCGCCGCTTGAATCCTCCGGCCAACAGTTTCATCTGGGTGGTGAGAAAATCAAAAGACG  
AAGAAGAACAGAAGGAAGAGACATGGCTGCCCCATGGATTTCGAGGAGAGAACTCAGGGGAAGGCCTGAT  
CGTCAGAGGTGGGCCCCCAGATGTTGATTCTCGACCACGAAGCAATCGGCGGATTCTGTACTCACTGC  
GGCTGGAACCTCCACGCTGGAGGGAGTCTGCGCCGACTACCGATGGTGACTTGGCCGGCGTTTCGCAGAAC  
AATTCTACAACGAGAAGCTGGTGACGGATGTTCTGAAGATCGGGGTTTCCGTCGGAGCTAAAGAGTGAA

CAGAGGGCCGAGGGAGGGGGTGAAGAGGGAGGCGATCGAGAAGGCGGTGAGGAGCGTAATGGAGGGAGAA  
GAAGTGGAGGAAATGAGGAGGAGAGCGGCGGCTGAAGGAGGCGCCATGGAAGCGTTGAAGAAGGTG  
GTTCTTCTACTCTGCTTTGACTTCTCTCATTGAAGAGTTGAGCTCCCGCCAAAAGATTAATGGAAAATA  
A

>GWHPAAAL023788

ATGGAGAGAAAAACCAGCATCTTAATGTTCCCATGGATTGCCTATGGCCATATATCTCCATTTCTAGAGC  
TTGCCAAAAAGCTCTCACAGAGAGACTTCTTTATATACCTGTGTTCAACTCCAGCCAATCTTGCTCCGT  
CAAGCCCAAAATTGATGAGAAATATTCTCTCTTAATAAAGCTTGTGGAGTTCCACCTCCCCACTCTCCCC  
GACCTTCCACCGTGCTTCCACACCTCCAACGGCCTCCCGCCCCACCTCATGCACACCCTCATGACCGCCG  
TTGACATGTCAAACCAAGTTTCTCCGACATTCTCGAAACCTAAAACCAGATTACTCATATACGACTT  
TGTCCTCGCATTGGGCTCCGGCCACCGCGCAGCCCACAACATCCCGGCGGTGGAGTTCATCACCAGCAGC  
GCCACTGTCTATTTTCGACATTACGAGAAAGCACACCAGGATGAAATGATTGAATCCGACAGATATCAGT  
ACAATAAGAATCTCTCCGTAAAGTCCCCCAACAATCCAACAATATCATACTGATCAAGAGCTTCAAGGA  
AATCGAAGGTAAGTACTATGATTATCTCTCTCTTTTGGCCAAGAAAAAGATTGTCCCTGTGCGCCAGTG  
GTTTCAGAAACCTTTCTGTGAAGAAGGGTTTCTGAGATCATTGAATGGCTAAACCAAAAAGATTACGGTT  
CAACCGTGTTCGTTTCATTTGGGAGTGAATGTTATCTCAAAAAAGAAGATATCATAGAAATAGCACATGG  
GCTTGAGCTTAGCAACGTGAATTTTCATCTGGGTTTTAAGGTTTCTAAAGGTGAGAACTAGGTGCACAA  
GAAACACTTCCATTAGGGTTTCTCGATAGGGTTAGAGAGAGAGGGATGGTGGTGGAGGGATGGGCGCCAC  
AGGCAAGGATACTAGCTCACCCAGTACAGGTGGATTGCCAGCCACTGTGGGTGGGGTCTGTGATTGA  
GAGCATGAGTTTTGGGGTTCCAATTATAGCCATGCCGATGCAGTATGATCAACCAATCAATGTACGGTT  
GTGGAGGAAGTGGGTCTTGGTGTGGAGGCCACCAGGGACATAACCGGAAAACCTGCAGAGAGAGAAAATTG  
CGGCGGTGCTCAGGAAGGTGATGGTGGAGAGAGAAGGGGAAGGCGTGAGGAAGAAGGCAAGAGAGATGAG  
GGATGATATCAGAATCAAAGGGGACGAGGAGATTGACAACGTGGTGTGGAATTACAGCAGCTATGCAAG  
ATAAAATAA

>GWHPAAAL023789

ATGGAGAGAAAAACCAGCATCTTAATGTTCCCATGGATTGCCTATGGCCATATATCTCCATTTCTAGAGC  
TTGCCAAAAAGCTCTCACAGAGAGACTTCTTTATATACCTGTGTTCAACTCCAGCCAATCTTGCTCCGT  
CAAGCCCAAAATTGATGAGAAATATTCTCTCTTAATAAAGCTTGTGGAGTTCCACCTCCCCACTCTCCCC  
GACCTTCCACCGTGCTTCCACACCTCCAACGGCCTCCCGCCCCACCTCATGCACACCCTCATGACCGCCG  
TTGACATGTCAAACCAAGTTTCTCCGACATTCTCGAAACCTAAAACCAGATTACTCATATACGACTT  
TGTCCTCGCATTGGGCTCCGGCCACCGCGCAGCCCACAACATCCCGGCGGTGGAGTTCATCACCAGCAGC  
GCCACTGACTATTTTCGACATTACGAGAACGCACACCAGGATGAAATGATTGAATCCGACAGATATCAGT  
ACAATAAGAATGTCTCCGTAAAGTCCCCCAACAATCCAACAATATCATACTGATCAAGAGCTTCAAGGA  
AATCGAAGGTAAGTACTATGATTATCTCTCTCTTTTGGCCAAGAAAAAGATTGTCCCTGTGCGCCAGTG  
GTTTCAGAAACCTTTCTGTGAAGAAGGGTTTCTGAGATCATTGAATGGCTAAACCAAAAAGATTACGGTT  
CAACCGTGTTCGTTTCATTTGGGAGTGAATGTTATCTCAAAAAAGAAGATATCATAGAAATAGCACATGG  
GCTTGAGCTTAGCAACGTGAATTTTCATCTGGGTTTTAAGGTTTCTAAAGGTGAGAACTAGGTGCACAA  
GAAACACTTCCATTAGGGTTTCTCGATAGGGTTAGAGAGAGAGGGATGGTGGTGGAGGGATGGGCGCCAC  
AGGCAAGGATACTAGCTCACCCAGTACAGGTGGATTGCCAGCCACTGTGGGTGGGGTCTGTGATTGA  
GAGCATGAGTTTTGGGGTTCCAATTATAGCCATGCCGATGCAGTATGATCAACCAATCAATGTACGGTT  
GTGGAGGAAGTGGGTCTTGGTGTGGAGGCCACCAGGGACATAACCGGAAAACCTGCAGAGAGAGAAAATTG  
CGGCGGTGCTCAGGAAGGTGATGGTGGAGAGAGAAGGGGAAGGCGTGAGGAAGAAGGCAAGAGAGATGAG  
GGATGATATCAGAATCAAAGGGGACGAGGAGATTGACAACGTGGTGTGGAATTACAGCAGCTATGCAAG  
ATAAAATAA

>GWHPAAAL023791

ATGGAGAGCAAAACCAGCATCTTGATGTTCCCATGGATTGCCCATGGCCATATATCTCCATTTCTAGAGC  
TTGCCAAAAAGCTCTCAAAGAGAACTTTTTGATTTACCTGTGTTCAACTCCGGCGAATCTTGTCCTCGT  
CAAGCCCAAAATTGATGAGAAGTTTTCTCTCTCTATAAAGCTTGTGGAGCTCCACCTCCCCGCTCTCCCC  
GACCTGCCGCCGTGCTTTCACACCACGAATGGCCTCCCGCCCCACCTCATGTTACCCCTCAAGGACGCCT  
TTGACATGTGCAACCAAAATTTCTCCGACATTCTCGAAACCCTGAAACCAGATTTACTCATTTACGATTT  
TCTCCAGCCGTGGGCTCCGGCCACTGCGGCCGCACACAACATCCCGGCGGTGGAGTTCATCACCAGCAGC  
GCCACCATGACGTCCCTGATGCTCCACGTGTTCAACGACCCAGACAAAGACTTCCCCTTCTCGGACACTG  
TCTATTTTCGAGATAACGAGAGAGCCCACCTGGATCGAATGATTGAATCCGCCAGAAATCAGCACAAGAA  
GAAGAATCCCGCCATAGAGTGTCTCAAACAATCCAACAATATCGTACTGATCAAGAGTTTCAAGGAAATC  
GAAGGTAAGTACTGTGATTATCTCTCTCTTTGGCCAAAGAAAAAGCTTGTCCCTGTCGGCCCTGTGGTTC  
AGGAACCTGTCTGTGAAGAACAGTTTTCTGATATCATTGAATGGCTAAACAAAAAAGATCACGGTTCAAC  
TGTGTTCTGTCATTTGGGAGTGAATATTTTCTCAAAAAAGAAGATATCACTGAGATAGCACATGGGCTT  
GAGCTTAGCAACGTGAATTTTATCTGGGTTTTAAGGTTTCCCAAAGGTGAGAACTTGCTGCACAAGAAA  
CCCTTCCATTAGGGTTTCTCGATAGGGTTGGAGAGAGAGGGATGGTGGTGGAGGGCTGGGCGCCACAGGC  
AAGGATACTAGGTCACCCAGTACCGGTGGATTCCGCCAGCCACTGTGGGTGGGGTCTGTGATTGAGAGC  
ATGAGTTTTGGAATTCGATTATAGCCATGCCGATGCACCTTGATCAACCCATCAATGCTAGGGTTGTGG  
AGGAAGTGGGTATTGGCGTGGAGGCCACCAGGGACATCACCGAAAACTAAAGAGAGAGAAAAATTGCGGC  
GGTGATCAGGGAGGTGGTGGTGGAGACAGAAGGGGAAGGCGTGAGGAAGAAGGCAAGAAAGATGAGGGAT  
GATATCAGAATCAAAGGGGAGGAGGAGATTGACAATGTGGTGCTGGAATTACTTCAGCTATGCAAGAAAA  
AATAA

>GWHPAAAL023813

ATGGATACTACTAGAGAGAGAAGCAGTGAGAGAATGAGAATACTGATGTTCCCATGGATAGCCCATGGTC  
ACATATCTCCATACCTAGAACTAGCCAAGAGACTCAACCAGAGAAACATCAAAACCTACCTGTGTTCAAC  
CCCCATTAATCTTAACTCAGTCAAGAACAAGATTGACAACAACCTCTGATTCACTACTACAACCTGGTTGAG  
CTCCACCTTCCGTCCACACCGGAGCTTCCCTCCGCAGTACCACACCGCCAATGGCCTCCACGCCACCTCA  
TGATCCCCCTCAAAGCCACCATCGAAGCCAGCGGCCACCCAAGTTCTCCGCCATGCTCGAAACCTAA  
ACCGGACTTGGTGTTGTATGATTTTAATTTGCCCTGGGGCGCCACTGTAGCTGCGTCGACAACATCCCT  
GCTGTTCAGTTCATAATCGTTGGAGCGGTGATGATTTCTTTGCCCTCCACACGCTGGAGAAACCGGCGA  
CCGAAAAGTACCCATTTCCGGCAATAACACTGTGCGAGTCCCAATCTCACGAAATGCGCAAAATTATTGGA  
CGAATCGGTGCTTGGGATTTCCGACAAAGACCGTTCCGGGAAGGCGTCGATCGTTCTCAAGACATTATT  
CTGATCAAAACCTCAACAGAAATTGAGAGTAACTACCTGAATTATCTCTCGGAGCTCGCCGAAATAAGA  
AGATTGTTCCGGTGGGCCAACTTGTACAGCAAGCCGATGATCGAAGACGTGATTTTAACGATGAGGACCA  
GATCATCAAATGGTTGGACAAAAAGGAGAAAGCTAATTCAGTCGTGTTTGTCTCATTCCGATCGGAATGT  
TTTTTATCAAAGGAGGAGATTCAAGAAATGGGTGCGGGTTTAGAGCTAAGCAGAGTTGATTTTCATCTGGG  
TCGTCAGATACCCAGTTGGGGACAAAACCTAGGGTTCTTGAAGATGAACTGCCCCAAGGGTTTAGAGAGAG  
AGTACTCGGAGGAGAGAGAGGCATGGTGGTGGAGGGATGGGCCCCACAGAGTAAAAATACTAGGTCACCCA  
AACCTAGGTGGGTTTTTGTAGCCATTGTGGGTGGAGCTCGGTGATGGAGAGCATGAAAAATGGGCGTTCCGA  
TCATAGGGATGCCAATGGGGTTGATCAGCCATTGAATTGTAAGGTGGTGGAGGACGCCGGCGTCGGGGT  
GGAGGTTAAGAGAGACAGCGATGGAAAAATAAAGGTGAAGTGATTGGTGAGGCGATAAGGAGGGTGGTG  
GCGGAGATGGGCGGCAGAGTGTGAGGAAGAAAGCAAAGGAGTTGGGTGAGAAGTTGAGGGAGACTGGAG  
AGAGAGAGGTGGAGGCGCGGTGCAGGAGATCTTGAAATTCAGTTCCAATAAACAATAA

>GWHPAAAL023819

ATGGCGGCGAAAAACGACGATGAATCAGGGGACAATCAAACGGTTGCGGAGTACGGCGAAAAACGACGAT

GGGGAGGATGTTCTGTTGCCGGTGAGGCGGCGGCATGGAGACGGGGAATTGGTGGGGATGAAAGAGAGAG  
TGNGAACTCCGGCGAGTTTTCTGAATGGCTGGACGGGAAGGAGGAGCTATCGACAGTGTTCTCTCCTTC  
GGGAGCGAGTACTTCTTGTCTAAGGAAGAGATAGTGGAGATAGCACATGGGTGGAGCTAAGCGAAGTTA  
ATTTTCATCTGGGTAATCAGGTTCCCAATGGGGGAGGAGAAGAAAAGTGGGTGGGGAGGCACTGCCATT  
AGGGTTTAAGGAGAGAGTAAGGGAGAGAGGGATGGTGGTGGAGGGATGGGCACCACAGGCGAAGATATTA  
GGGCACAAAAGTGTAGCTGGGTTTGTGTCTCACTATGGGTGGAACTCGGTTTTGGAAGGGATGAAGTTTG  
GGGTACCATTTGGTGGCCATGCCCATGCACCTTGATCAGCCGGTGAACGCCAGGCTTGCGGTGGAGGTAGG  
TGTTCGCGTGGAGGCTTTGAGGGATGAGGACGGCGCGTTCAAAGGAAGGAGGTGGCGAGAGTGATAAGG  
GAGGTGGTGGTTGGGGAAAATTGTGGAGGAGTTAGAGAGAGAGCAAGGGAGTTGAGTGAGAACATGAGAT  
TGAGAGGTGATGTGGAGGTACATGGGCTTGTGGAAGTCCTAGCACAACTTCATCAGAAGAATAAAGCACA  
ATCATGTTAG

>GWHPAAAL024115

ATGGCCGAGGATAGGAATGAGGGAAACATTGTTATGTTTCCATTTCATGGCCCAAGGCCATCTCATCCCTT  
TCTTAGCACTTGCGAGACAGATAGAGCAAAGGCACGGCGGCTACACAATCACCATCGTCAACACACCTCT  
AAACATTTGTAAGCTCAAATGCTGGCTCCCGCCGGAACAACCATACGCCTGGTAGAGATTCCCTTCTCC  
GCCGCCGACCACGGCCTCCCTCCAGATTTCGGAACACCGACATGCTTTCCCGTGAGCAAGCCCTCTACC  
TCTTTGAGGCTTCGGAGAGTCTCGAAAAACCGTTTCGAGAATCTCATATCAGAGATTGCCACCGCGCATGG  
TCGCCAGCCAATATGCATCGTGTGCGATATGTTCTTGGGGTGGACGGTCAATGTCGCGAAAAAGCTCGGA  
ATCTTTCATTCCGTGTTTATCGCCGGTGACGGTTACGGCATGGGATTGTACTTTTCTTTGTCTCTGAATG  
AAAATTTGTGGACGGTTGAGGCGGCGGATGAGTTTCTTCCAGTTGACTTTCCTGGAGCAGCAAGGATTCA  
CTGGTCACGGATTCCGATAGACCTCAAATATGAAGAGGCGGCCGAGTCTTGTTTCGATTTTCGAAAACGC  
CAATTTTCTTACTGTTTGTGCTCCGATTCGATCTTGTGAACAGTATCAAGGAGTTGGGGCAAAAGGGCG  
TGGAATATTTCCGCCGAAAACGGGAGGAAAGCCTGTATGGACAATAGGCCCAGTTTCCAATCTCACGGT  
GAAGAACAAAATATTCACCAAAATCAGCACAAACCCTATCTCCGACTGGCTCGATCTTCACCTCCGGGT  
TCGGTTCATACATATCGTTTGGATCACAGTGCAGCCTCTTGGCCTCACAATGAAGGAATTGGCTATGG  
GTTTGGAGGAGAGCAGGTGTCCATTTCATATGGGTGGTTCGGCCGCCGGTTCGAATTTGACCTGACCGGAGA  
TTTCAGGAGTGAATGGCTACCGGTGGGGTTCGAGGAGAGAATGAGGCGGTTGAACCAGGGTTTTTTGATT  
CACGGATGGGGCCACAGCTAGAGATTCTCTCTACCGGTTCGACCGCGGGTTTCTCAGCCACTGCGGGT  
GGAATCCGTGGTGGAGGGGTGTGCGGTGGAGTGGTGATATTGGGCTGGCCAATGGCCGGAGAGCAGTT  
TTCAACTCGGAGATGCTGGCGGAAGAGGTGGGCGTTTGCCTGAGGTGAGAGAAAAGAATAACGGGTGC  
GGGATTGTGCGCCATCAAAGGATTGCAGAGGTGATCGAAATGGCCATGGGGAAGTCAGAGAAAGGGGAGG  
AAATGAGGAGAAAAGCAAGAGAGATGAGCGAGAAAATGGAAGCTGCAGTAAAAGTGGAAGAAGGGTTAG  
AGGATCATCTGTCAAAGTCATGGACGAATTTATCAGCACAGCAATATCAAAGAAGAAGAGATAA

>GWHPAAAL024577

ATGGCGGCAACCATCAGAATGGCGGTAGCCTAACTTTCACCGGTCCGGTTCCATCGTTGCCGTTCCCTT  
TTCCAGCACACGGCCATCTCAACCAGCTCCTCCACCTCTCCTGCTTCTTCTCCTCCGCCGGTCTTCCCGT  
TCATTTGCCCAGACCGCCACCCACAACCGCCAAGCCAGGCTCCGCGCCACCAGCCTCAACTTCGAGAAG  
ATCCATTTCCACGACCTCCCTCACCCGATTTCCAATCTCCGCCACCGAATCCGACCGCGCCATCAAAT  
TCCCGGCCATTTACAGCCGTCGTTTCGAGGCCGCCCTCCATCTCCGGCAACCCCTCGCCGCCCTCCTGCG  
AGAAATCTCCACCGTTTCGAGAAGGGTCATCGTCATTTCATGACCCACTCATGAGTTCGGTGGCGCAAGAA  
GCTGCGTCGATTCTCAACCCCGAAACCTACGTCTTCAGCTGCCTCTCCGTCTTGTTTCAGCTCGCGCACC  
TCTGTGAAAATAAATTTAGGCGGAACCTCCGGCGAACCTTACCCACCATGGATGGGTGCTTAACGCCGGA  
ATTCATGGAGTTTTCAGCTTCTCAATTTTCAGCTACTGGGGACTGAAGAAGGAAAATTCAGAGCTGGGTAT  
CTCTATAACTCCTGCAAATTAATCGAAGGTAGGTACATTGATTTACTGTGAGCTATGATCAGTATCAAG

ACAAGAAAATATGGGCAATCGGACCGATCCTGCCGGTAAAATCAGTGACCAAAACCTCAAATTGGAGCCA  
TAAATCCATTGAATGGCTCGATAAAACAAGAACCAGATCGGTGATTATGTTTCTTTCCGGACGATGACG  
TCAATTTCCGACGAACAGATCAGAGAGTTGGCGGTGGGGTTAGAACAGAGTAAACAGAGGTTTCATCTGGG  
TTTTGAGAGAAGCAGACAGGGCAGACATTTTTTCCGGCGAAGAACAGAGGAAGGTTGAGGTGCCGGAGGG  
GTTTGAAGAGAGAGTCAAAGGGATAGGGATGGTGGTGAGAGACTGGGCGCCGCAGCCGGAGATTTTAGGC  
CACCGGTCGACCGGCGGATTTCATGACTCACTGCGGTTGGAATTCGAGTTTGAGAGTGTGACCATGGGAG  
TGCCGGTGGCCGCTGGCCGATGCACTCCGACCAGCCGAGAAACGCCGTTTTGTTGACGGAAGTACTGAA  
AGTCGGCGTTCCGGTGAGGGAGTGACGGGAAAAGGAGAGATTGTGGGTTTCGTCGGAGATCGAGGAAGCT  
GTGAGAAGATTAATGGCGTCTGAAGAAGGGGAGGAAATAAGGAAGAGGGCGGAGGAACTCGGCGGAGAAA  
TCCGCCGATCTACGGCGGAAGGCGCGTTTGAGGGTGAGTTAGATTTCATTTGTAGCCCATATCACCAG  
AAATTAG

>GWHPAAAL024578

ATGGAAGCCTTTGGATTTTCCGGCAGAGACCACTCAAGCCGCCACGACGTGGTGGTGGTGATGGTGCCAT  
TTCCGGCGCAGGGCCATCTGAACCAGCTCCTCAACCTCTCCCGCCTCCTCACCTCCACGGCATTCCCGT  
TTACTTCGCCGGCACC GCCATTCAACAACGCCAGGCACGGCTGCGTGCCACGGCTGGGATCCACTCACC  
ACCCCAACATGCACTTCCACGACTTCCCAACCCCTTCGTTCCAATCTCCGCCGCCGAACCCTAATGACG  
CCTCCACCAGCTTCCCCACCACTCCTCCCTTCCTTCAACGCCCTCCCTCGACCTCCGCCAGCCTTTTCGC  
CGATCTTCTCCGCGATTTCTCGCCGAGGCAAGGAGAGTCGTCGTCATTACGATTCTCTGATGGGTTCC  
GTTGTTTCAGGACGTCGGTTCGACTCCGAATGCCGAGTCCTACACTTTCACAGCGTCTCCGCCTTCACCA  
TTTTCTGGTACCTCTGGGAAGCGAAGGGCAGGCCCTTCCGGTGGAAGGAGAGATTCTCAAAGACATTCC  
GCCGACCGACGGCTGCTTCGCGTCGGAGTTCCCGAGTTTCATACAGAACCAACATGCATACATGAAGTTC  
AACTCCGGCGATCTTTACAACACCAGTAAAGTCATCGAAGAAACCTACATCGATTACTTGTGTAAAGAAC  
CGATTAAAGGAAAACAAGAAGCAATGGCCGATCGGCCGTTTAATCCGGTAGAGCCCGTTGAGACGAAGAA  
ACCCAACGGCCGCCATTTTTGCCTGAACTGGCTCGACAAAACAGGCAATAAACTCTGTGATTTTCGTTTCG  
TTCGGAACGTCGACTTCATTGAAAGACGATCAGATCGAAGAACTGGCAAATGGGTTGGATCAGAGCGAGC  
ATAGATTTCGTATGGGTGGTGAGAGACGCCGACAGAGGTGACGTCTTCGACGGAATGCCGAGGAGAGTCGA  
ACTTCCGGTAGGGTTTCGAAGAGAGGGTGAGAGAGAAGGAATTGTAGTGAGAGATTGGGCGCCGAGCCC  
GAGATTCTCCGGCACC CGTCGACGGGAGGTTTCATGAGTCACTGCGGTTGGAATTCCTGTATGGAGAGCA  
TCACCATGGGGTGCCGATCGCGGCGTGGCCGATGCACTCCGACCAGCCGAGAAATGCCGTGCTGATCGC  
CAAGTTGCTGAAGATTGGGATCATCGTGAAGGACTGGGGGCGCGGGGGAGCGAGTGGTGGCGGAGACG  
GTTGAGAAGGCCGTCAAGTCGGAAGAGGGTGACAAGATACGGCACGGCGCGGTTTGAGCGACGCGGTGA  
GGGAATCGGTGGCGGAAGGTGGGTCCACGCGGTTGGAGTTGGATTTCGTTGCTCACATCACTAGGAG  
TTAA

>GWHPAAAL025080

ATGGAGGATGCCATAGTTCTCTATCCTTCTCCAGGAATTGGGCACCTCATCTCCATGGTGGAGCTGGGGA  
AGCTCATACTCAACCACCACCGGTCCTTCTCCATCAACATCCTCATCACCACCCACCCCTACAATACCGG  
CCGCACTGCTCCCTACATCGACCGAGTCTCCGCCGCAATCCCTCCATCCACTTTCACCACCTCCCTCC  
GTCCCCCTCTCAGTCTCCACCACCTCCCTCAACCACGAAACCTGGCCTTCCAACCTCCTCCTCTCAACA  
ACCCCATGTCCACCAAGCCCTTACCTCCATATCCCAAACCTCCACTCCCTGCGCCTTCATCATTGACTT  
CTTCTGCGCCTCTGCTCTCTCTGTTGCCAAAGATCTCAATATTCCGACATACTTTTCTACACTTCCGGT  
GCCGGAGCCCTCGCTTCCTTCTTTATCTCCCCACCAATTCACCGGAGCACTGCCGGAACCTGAAAGACC  
TTAAAACCTCCCTCCACATCCCCGACTCCCGCCATTTCCGGCGTCTGACATGATGAAACCGGTGCTCGA  
CCGATCTGACAAAAGCGTACGAATTCCTTCTTGACGTATCCTTAAACTTCCCGAAAGCTTCCGGAATCATC  
ATCAACACTTTCGAATATCTTGAGCCTCGATCCATCAAGGCAATATCCAGCGGTCTCTGTGTTTCGAATT

CGGACGGTCCGCCGCCGCCGATCTATTGCATCGGACCTTTGATTGCAGCGGGAGACAGATCCGACGGCAA  
AACCTTGAACAGACACGAATGCTTAAGGTGGCTCGACTCGCAGCCTAGTAAAAGTGTCGTGTTCTTTGT  
TTTGGGAGCTTAGGGTTGTTTCCGATGGACCAGTTGAGAGAGATCGCTATTGGGTTAGAGAGAAGCGGTT  
GTCGGTTCTTGTTGGGTGGTGAGGAGTCTCCGCCGCCACCTGAAAACCAAACAGAGCGGTTTTTGGCTCC  
TGCAGACCCGATTTGGGCGCATTATTGCCGGACGGTTTCATGGACCGGACCGAGGGGAGGGGGTTCGTG  
GTGAAGTCGTGGGCCCCACAGGTGGAGGTGCTAAGTCATGACTCTGTTGGTGGGTTCGTGACTCACTGTG  
GGTGGAACTCGGTTTTGGAGGCGGTGTGTGCCGGCGTGCCAATGGTGGCGTGGCCGCTCTATGCGGAGCA  
GAAGTTCAATAGGGTGGTGCTGGTGGAGGAGATGAAGTTGGCTCTACCGATGGAGGAGTCCGAAGATGGG  
TTCGTTTGCCTGGCGAGGTGCGAAGCGAGTTACCGAGTTGATGGACTCGGTGGACGGGAGATTGGTGA  
GGAAACATGTGTTGGCTGCAAGAGATGCCGCTAAGGCGGCGATTGGCGATGGCGGGTCATCTCGACTCGA  
TTTGGGTCAATTAATTGAGTTGTGGACTCAGAACTGA

>GWHPAAAL025081

ATGGAGGATGCCATAGTTCTCTATCCTTCACCAGCAATTGGGCACCTCATCTCCATGGTGGAGCTGGGGA  
AGCTCATACTCAACCACCAACCTACCTTCTCAATCATCATCTGATCGCCACCCACCCCTACAACGCCGG  
AAACACTGCTCCCTACATAAACCAAGTCTCCGCCACCACCCCTCCATCCACTTCCACCACCTCCCTCC  
GTCCCCCTCTCACTATCCACCGCTCCCGGAACCACGAAACCTGGCCTTCCAACTCCTCCTCCTCAACA  
ACCCCATGTCCACCAAGCCCTTACCTCCATATCCCAAACCTCCACTCCCCGCGCTTCATCATGGACTT  
CTTCTGCACCCCTGCTCTCTCTGTGCGCCAGAGATCTCAATATTCCGGCGTACTTTTTCTATACTTCCGGC  
GCCGGAGGCCTCGCTTCTTTCTTTATTTCCCCACCATTACCGGAGCACTGCTGGAACTTGAAAGACC  
TTAAACCTTCTCCACATCCCCGACTCCCGCGTTCGCGGCGACTGACATGCCGAAACCGGTGCTCGA  
CCGAGCTGACAAAGCATACGAATTCTTCTTGATGTATCCTTAAACTTCCCAAAGCTTCTGGAATCATT  
GTCAACACTTTTGAATATCTTGAGCCTCGATCAATCAAGGCAATATCCGATGGTCTCTGCGTTTCGGATT  
CGGACGGTCCCACGCCCGGATCTATTGCATTGGACCTTTGATCGCTTCGGGAGATAGATCCGATGGCGA  
AATCGTGAACAAACACGAATGTTTAAGGTGGCTCGACTTGCAACCTAGCAAAAGTGTCGTGTTCTTTGT  
TTTGGGAGCTTAGGGTTGTTTCTTTGGAGCAGTTGAGAGAGATTGCTGTTGGGTTAGAGAGAAGCGGTT  
GTCGGTTCTTGTTGGGTGGTGAGGAGTCCACCGCTGCCACTGGAACCAAACCGAGCGGTTTTTGGCTCC  
TGCGGACCCGATTTGGGTGCGTTATTGCCGGACGGTTTCATGGACCGGACCGAGGGGAGGGGGTTCGTG  
GTGAAGTCGTGGGCCCCGAGATGGAGGTGTTGAATCATGACTCGGTGGGTGGGTTCGTGACTCACTGCG  
GGTGGAACTCGGTTCTGGAGGCGATGTGTGCCGGCGTGCCGATGGTGGCGTGGCCGCTCTATGCGGAGCA  
GAGGTTCAATAGGGTGGTCTTGGTGGAGGAGTTGAAGTTGGCTCTACCAATGGAGGAGTCCGAAGACGGG  
TTCGTTTGCCTGCGAGGTGAGAGAGCGAGTTACCGAGTTAATGGACTCGGTGGAAGGGAGATCAGTAA  
GGACGCATGTCTTGCGGCGAGAGATGCCGCTAAGGCGGCGATTGGTGATGGCGGGTCGTCTCGACTCAA  
TTTGGGTGATTAGTTGATTGATGACTCGGAACCTGA

>GWHPAAAL025228

ATGTCTGTCCATGTCTTGATCTTCCCATAACCCGCCCAAGGCCATCTCCTCCCACTTCTGGACCTCACCC  
ACCAACTAGCCCTCCATGGCCTAACCATACCTGGTCACACCCAAAAACCGCCCCACCTTGACCC  
ACTTCTCTCGACCCACCCGTCGATCGGAACCTGGTCTTGCCCTTCCCGCACCACCCCGCCATCCCTCC  
GGCGTCGAAAACGTCAAGGACCTTGGAATTCGGAAATGTCCTCGTCATCAACGCTTTATCCAAGCTTA  
GGGACCCGATTATCCAGTGGTTCAAGGCACACCCTAATCCCCCTGTTGCCATCGTCTCCGATTCTTCTCT  
CGGGTGACCAACGATCTGGCCGGTCAACTGGGTATTCCCCGCGTCGCTTTTACTCCTCCGGTGCCTTT  
TTAACTCCATTTTGTTTCATTTTACC GCGAGTTGAGATCTGCTGCCCTGTCTTGACCGCGGTAAAAT  
TCACTGATTTACCGCGGTGCGCGAGTTTACTGAGGCGCATCTTCCACCATAGTCCGGCACTACAGGGA  
ATCGAATCCCGAGTGGAACCTTTGAAGGAGGGCGTAATTGCAAATTCGTGGAGTTGGGGGTCCATTTTA  
AACACATTTGATGATTTGGAGGGGAGTTTCTGGAATACTTGAAAAAGAAAATGGGTACAAACCGGGTTT



ATGGAGTCGGGCCGCTCAATTTGGGTCGGGTCAATACGGATCCGGATGCGGATCCAAGTAATACCGTTTT  
GGGATGGCTTGATGGTTGCCCCGATGGGTCTGTGATATACGTTTGTTTGGGAGTCAAAAGTTTCTCAAG  
AAGGCCAAATAGAGGCTTTGGCTCTCGGGCTTGAACGGAGCAAGGCCGATTATATGGGTAGTCAAGC  
CCATAACGGCCCAACAAGAGGCGGACGGGTACGGGTCAATCCTGGACGGGTTTGAAGAACGGGTATCCGG  
GCGGGGCATGGTGATAAAAGGTTGGGCCCCACAGGTGAAAATACTGAGTCACCGAGTTGTTTACGGGTTT  
CTGAGTCACTGCGGATGGAATCGGTGCTCGAGGCGATAGCGGCGGGGTGATGATACTGGGTTGGCCGA  
TGGAGGCGGACCAATTTGTGAATGCTAGGCTATTGGTGGAATACATGGGGGCAGCAATCCGAGTTTGTGA  
GGGGCGGACTCGGTGCCTGACTCGGATGAGTTGGCCCGGACGATCGCCGAGTCAGTAGATGGGAACAA  
CAAGAGAAAGGGAGAGCAAGGAATTGAGAGATAAAGCATGGGAAGCAGTTGGGCCTTGTGGGAGCTCTA  
CAAAGGATTTGGTGGGCTTTGTGAAGGATCTGGCCCAACTTGATGAGAATGGTGTTGA

>GWHPAAAL025545

ATGATTCCGACGCTGGACATGGCCAAGCTCTTCTCCTCCAGGGGTGTCAAAACCACCATCATCACCACCC  
CTCTCAACGCCCTGTTTTCTCAAATCAATCCAGAGGTCCAACCAATTGGGTCTGAAATCAGCTTAA  
AATCTTTGATTTTCCGGCGGTTGCCGCGGCTTGGCGGAAGGTTGCGAGAGCGTGACCAATCACCTCC  
GAGGACATGATTCCAAAATCTTCGTGCCCACGGCGTTGCTCCGGGAGCCGCTGGAGCAGCTGCTAAGTG  
ACCACCGCCCGGATTGTTTAGTCGCCGACATGTTCTTCCCTTGGACGACGGAGTCGGCGGCGAAATTCGG  
CATTCCGAGATTGCTTTTCCACGGGATCAGTTTCTTCGCGCTCTGCGCCGGGAGTCTTTGAGGACGCAC  
AAGCCTTTCCGGCAAGTCACGTCGGATTCCGAACCTTTGTCTGCCAGAGTCCCGCACGAGATAAAGC  
TGACGAGAACGGAAGTGGCGCCGTTTGACCTGTACGATACCCAAACGGCCATATCCGGAGTCTTGAAACA  
AGTGAGGGAGTCGGAGAAAATTTGTTATGGCATTATCGCAAACACCTTCTATGCACTCGAACCGATTAC  
GCCGATCACTACAGAAACGCCATGGGGAGAACGGCGTGGCACGTCGGACCTCTCTCTCTGCAACAGAG  
GAATCGAAGACAAAGCAGAGAGAGGAAAAAAGCTTCCATCGACGGACACGAATGTCTTCAATGGCTTGA  
TTCAAAGAAACCCAAATCCGTCCTCTACGTCTGTTTCGGAAGCATGGCCAAATTCGCCGATTCCCAACTG  
TACGAAATCGCCGCCGCTTGAATCCTCCGGCCAACAGTTTCATCTGGGTGGTGAGAAAATCAAAAGACG  
AAGAAGAACAGAAGGAAGAGACATGGCTGCCCCATGGATTTCGAGGAGAGAACTCAGGGGAAGGCCTGAT  
CGTCAGAGGGTGGGCCCCCAGATGTTGATTCTCGACCACGAAGCAATCGGCGGATTTCGTACTACTGC  
GGCTGGAATCCACGCTGGAGGGAGTCTGCGCCGACTTCCGATGGTGACTTGGCCGGCGTTCGAGAGC  
AATTCTACAACGAGAAGCTGGTGACGGATGTTCTGAAGATCGGGGTTTCGTCGGAGTTAAAGAGTGAA  
AGCAGGGCCGAGGGAGGGGTGAAGAGGGAGGCGATCGAGAAGGCGGTGAGGAGCGTAATGGAGGGAGAA  
GAAGCGGAGGAAATGAGGCGGAGAGCGGCGGCTGAAGGAGGCGGCCATGGAAGCGGTTGAAGAAGGTG  
GCTCTTCTACTCTGATTTGACTTCTCTCATTGAAGAGTTGAGCTCCCGCCAAAAGATTAATGGAATA  
A

>GWHPAAAL025754

ATGGAACCAAGAAAGGTAATGGCGGAGCGCACATACTGGCGATTCTTTCCCTGCCCGAGGACACA  
TGAACCTCTGATCCAGTTCTGCAAGCGCCTCGTCTTCAAGGGCGGAGTGAAAGCCACTGTTGCCATCAC  
CAGGTACCAGGCCAAGTCCATCCAGACGAGACTCGACACCATACAGATCGACACGATCTCCGACGGCTAT  
GACGAAGGCGGCTTCTACGTAATCGACAGCATCGAAGACTCCATCGAGAAATTAAGGTTGCGGGATCTC  
AAACCTTGCCGAATCATCGAGAAGTACGAGAAATTTGGGAATCCCATTGATTGCATCATCTACGATGC  
GTTCTTGCCTTGGGTTCTTGATGTCGCCAAGAAGTTCCGGAAAAATCGTGCTGCTTTTTTACCCAACCC  
TGTGCCGTGAATTGCATCAATTATCACGTGTATCATAAATTGCTACCCTACCCTTTCTCTTCGCCGCCGA  
TCTCCGTTTCCGATTGCCCTCCGCTTAATCTCGAGGATATGCCCGGGTTTATCTACGTTGATCCGGGTCA  
CTACGTGCTGGTACAAAGCCAGTTCTCAAAAGCTGATGAAGCTGACTACCGTTTCGTCAATACATTCTAC  
GATCTGGAGGCTGAGGCAGTGGATGCGATGAAGAAGATCCATTCTCTGAGAACAAATAGGACCGACAGTCC  
CGTCATTCTACCTGGACAAAAGAGTGCCAAATGACAGCAACTACGGGCTTCATTCTCCAATTTGATCAT

GCAACAAAAGAAGAGCACGAGCACCCCCGACGCGGACCCCTTGGCCTGCTTGGACTGGCTGAGCACTAAA  
CCACCCCGTTCAGTTGTGTATGTGTCTGTTGGTAGCGTGGCCGTGGCCAGCCAGTGAGCGAAGAAATGA  
AGGAAATCGCATGGGGTTTGAGGAACAGCAATTGCTTCTTGTGGGTGTGAAGGGTAACGAAGAGCC  
GAATCTCCCTGAGAATTTCAAGGAAGAGACAGCTGACAAGGGGATGATAATCCGTGGAGTCCCCAGTTG  
GAAGTGTGGCGCATGAAGCTACTGGGTGCTTTATAACACATTGCGGGTGGAATTCAACTATTGAATCGT  
TGTGTTTGGGTGTGCCGATGGTGGCGATGCCTAAATGGGCGGATCAGACAACGAATGCCAAGTACATTGA  
GGATGTTTGGAAAGCCGGGGTGAGGGCAAAGGTTGGTGAGAATGGAGTTGCTTCAAGGGAAGAAATCGAG  
AGGTGTATAAGGGCGGTTTTGGAGGGAGAGAGTGGGAAGTATTACAAGAGCAATGCTATGAAATGGAAGG  
ATTTGGCTACACATGCTGTGAGCGAGGGCGGACTTCGGACAAGAACATTGCCGAGTTTTTGTCTGAATT  
GAAGGCCCGTTGA

>GWHPAAAL025999

ATGGAGAAAACAACCCACGTAGCAATTTTGCCGACGCCGGGATGGGTCATCTTATTCCGCTGGTGGAAT  
TCGCCAAGAGACTCATCGACGGTTACAATTTTTCTTCACTTTGATTCTTCCCACCGACGGGCCTCTGTC  
GAAAGCCCACAAGGAGTTTGTGGATTCCCTTCCGGCGGGGATTGACCACGTTCTGCTGCCGCCGTGAGT  
CATGACGACATGACGGTGGAGAACCGGATTGCGCTCACCATCAGCCGGTCTCTCCCGCTTTTCGCGACG  
CGTTCAAGACGTTGGTCGACGAGAAGAAAGTGGCGGCGCTGGTGATCGATTTGTTCCGTACGGACGGTTT  
TGACGTTGCGATTGAGTTCGGCGTGTGCGCGTTCATCTTCTTCCCGTCGACGGCGATGGCTCTGTCGTTG  
TTTTCTCACTTGTGCAAGCTCGACGCTGAGACCGTCGGCGAGTACAGAGACCAGCCGGAACCGATTCCGA  
TTCCGGGTTGCATACCGATTAGGGGAAAGATATGCTGGACCCGGTTCAGGACAGGAAGAACGACGCCTA  
CAAATGGCTGTCCACCACGCCGGGAGGTACAAATTGGCGGAGGGAATCATGGTGAACAGCTTCAGGGAG  
GTGGAACCCGGACCCATAACCGCTCTTCTGAAGAAAGAACCCGGTAAACCACCGATTTACCCCGTCGGAC  
CGCTCATAAAGATGAGTTCGAACGCCGACGACGCCGAGTCGGAGTGTTTGAATGGCTGAACGGGCAGCC  
GAGTGGGTCCGTCCTCTTCGTCTCCTTCGGCAGCGCGGGACCCTCTCATCCGTCCAGCTCAATGAACTC  
GCCATGGGACTGGAAATGAGCGAGCAGAGGTTTCATCTGGGTAGTCCGGAGCCCGAACGACGGAACCTCCG  
CCGCCACCTACTTCAACGTCAACAGCCAAACCGACCCTTACAGTTTCTACCGGAGGGATTTCGTGCGCCG  
AACCAGGGGGCGCGGCTGCTCGTGCCGTCTGCGGCCCCGAGGCTGCTATCCTCAGCCACGGCTCCACC  
GGCGGGTTCTTGACCCACTGCGGCTGGAATCCACCCTTGAGAGCGTCTACAACGGCGTGCCGCTCATCG  
CCTGGCCGCTCTACGCCGAACAGAGGATGAACGCCGTGATGCTGACGGAGGATCTGAAGGTGGCGTTGAG  
GCCCCAAACTGGAGAAAACGGGATCGTAGGCCGCTCGAAATCGCGAACGTGGTGAAGGGTCTGATGGAA  
GGGGAGGAAGGAAGGGGATTTCGGAGCAGAATGAGAGATCTGAAGGACGCGCGCGCAAAGCCATCGGAG  
AAGACGGTGCTTCTACAAAAGCACTTTCTGAAGTGGCATGCATATGGAAAAATAAGATTAATTACTGCTT  
TAATTAG

>GWHPAAAL026143

ATGGACCACCACCACTTCCTCCTCATCTCTCTCCCTGGCCAAAGCCATTTAAACCCCACTATCCAGCTCG  
GCAAAGTCTTCGACGCGCCGGCGTCACTGTACCTTCGCCACCACCGTCTACGGCCTTAACCAGCTAAA  
GACTAAATCAACCACCGTCGACGGCATAGCTACACCTCCTTCTTGACGGTCACGACGAAGACGGCCAC  
AAAGCTAGAAGCAACTTCGCCGGCTACATGGACGATCTAAAGCGCGTGGGGTCCCAAAACCTGATAAAAC  
TCCTCGAAAACCTCGCCGGCGAGGGTCGTCCCGTCACCTTTATAGTCTACACCGTTCTCCTTCCATGGGT  
TGCCCAGGTGGCCCGTGAGATGCACCTGCCGTGCGCATTTCTTCCCATACAGTGTGCCGCCGCTTTGGCC  
GTGTATCACCGCTTCTTCAACAGCAGCGACGGAATCCACGGCGGCGAAAACGAAATAAACGACTCGATTT  
CCGTCGAATTACCGGACTACCGCAGCTGAGCTCCGGCGAGATCCCTTCGTTTCTACTGCCGGCCGATCC  
GCAACATTCTTCTATCAATCAGCCTTGCCGAGAACACATACTCACCTCGAAGAAGATCCAAATCCGACG  
GTTCTGATCAACACATTTCGATGCCTTAGAGGAAGATTCAATCAGAGCCGTCCGGAATATGAAGATCATCG  
CCGTCGGCCCCCTTAGTTCGTCGGCCTTCTCCGACGGAATCGACGCGTCCGACAAATCATTCGGCTGCGA

TCTGTTTCGAAACTCCGGCGACCAATACCTCCCGTGGCTGGATTGCGAAATCGGACTCCTCCGTCATCTAC  
GTTTCCTTCGGGAGCCTAGTCGTTCTTGAGAAACCCAGAAAGGAAGAGATCCTGAACGGACTGATCGACA  
CCGGGAGACCTTTCCTCTGGGTCATCCGCGACACCGCCGAGAAGAAGAAACCGGGTGC CGGAAAA  
TGGGCTGGTGGTGCCGTGGTGTACGCAGGTGGAGGTGCTGGCCATTTCATCGATCGGATGCTTCGTCACC  
CACTGCGGATGGAATTCGACGATGGAGAGCCTGGTGGCCGGAGTTCCGGTGGTGGCGATGCCGCAATTCT  
CCGACCAGTTGACGAACGCGAAGCTGGTGGAGGAGGTGTGGGGGAATGGGGTTAGAGCGGGAAAGAGTGA  
AGAGAAGGGGGTTGTAGAGAGAGAGGAAATCAGGAGGTGCGTGGAGGTGGTGGTGGGGGAGGAGAGAGG  
GGAGAGGAGATAAGAGGAAGTGCTCGGAAATGGAGAGGTCTGGCCATGGCTGCCGTCAGGGAGGGGGTT  
CTTCAAGCAAAAATCTTAGAGAATTTTTGGATAGCTTGGGATAA

>GWHPAAAL026144

ATGCACCTGCCGTCGGCATTCTTCGCCATACAGTGTGCCACCGCTTTGGCCGTCTATCACCGCTTCTTCA  
ACAGCAGCGACGGACTCCTCGGCGGGGAAAAAGAAATCAACGAGTCGCTTTCGGTTGAATTACCTGGACT  
GCCGCCGCTGAGCTCCGGCGAGATCCCTTCATTTCTAATGCCGGCCAATCAGTATCATTATCTGTAGT  
CCGTCTTTCCGAGAACATACTACCCCTCGAAGAAGATCCAAATCCAACGGTCTGATCAACACCTTCG  
ATGCCTTAGAGGAAGATTCAATCAGAGCCGTCCGGAATATGAAGATCATCGCCGTCGGCCCCCTTAGTTCC  
GTCGGCCTTCTCCGACGGAATCGACTCGTCGGACAAATCATTTCGGCTGCGATCTGTTTCGAAACTCCGGC  
GACCAATACCTCCGGTGGCTGGATTGCGAAATCGGAATCCTCCGTCATCTACGTTTCCTTCGGGAGCATAG  
TCGTTCTTGAGAAACCCAGAAAGAGATCCTTAACGGACTGATCGACACCGGGAGACCTTTCCTCTG  
GGTCATCCGCGACACCGCCGAGAAGAAGAAGAGACGGCGGTGCCGAAAAATGGGCTGGTGGTGCCGTGG  
TGTACGCAGGTGGAGGTGCTGGCCATTTCATCGACCGGTGCTTCGTCACCCACTGCGGGTGAATTCGA  
CGATGGAGAGCCTGGTCGCCGTGTCCCGGTGGTGGCGATGCCGCAATTCGCCGACCAGTTGACGAGCGC  
GAAGCTGGTGGAGGAGGTGTGGGGGAATGGAGTTAGAGCAAGAAAGAGTGAAGAGAAGGGCGTTGTAGAG  
AGAGAGGAAATCAGGAGGTGTGTGGAGGTGGTGGTGGGGGAAGGAGAGAGAGGAGAGGACATAAGAAGAA  
ATGCTCTGAAATGGAGAGGTCTGGCCATGGCCGCCGTCAGGGAAGGGGGTCCTTCGTGCAAAAATCTTAG  
AGATTTTCTGGATAGCTTGGGATAA

>GWHPAAAL026243

ATGGAAGAGCTGACGGAAACAAGAAGATATCCAAAAGAGGTGGTGTAGTCCCTTATCAAGCACAAGGCC  
ACATGAGCCCCATGCTCCAACCTCGGCACCCTCCTCCACTCCCTAGGCTTCTCCATCACCGTTGCGCACGC  
CCGGATCAACTCGCCTGACCCCTTGACCCACCCGGATTTCGATTTCGACCCATATCGGAGGACCTATCG  
GATCGCGACACCTCATTCCATGGCCTACTCTCTCTCATCAGACTCTCAACACCGGCTGCAAGAGACTGC  
TCCGGGAGTGTGTTGGTGGGTTGAAGGAAGAACGGGGACCGGTGCGATGCGTGGTGTACGACTCGGTGAT  
GTATTTTGCTGATGAGGTGGTGAATCAGATGAAGATTCCGAGCATGGTGCTTCAGACTTGTAACTGCTGCT  
TATGTTTTGCCCTGCCAGCTTCTTCCCCAGCTTAAGGCAGAAGGCTATCTTCCCTCTGAATCGGAAGATC  
CTGCCGGGGACCACCTCGTGCCGAAGCTTTATCCCCTCAGATTCAAGGATTTACCCATTCTTAAATTTAA  
CACACCCACTCTCAACTACTCACGACTCTAAGCGACATAAGAACATCCTCCGCCGTAATTTGGAACACC  
ATTGACCACCTCGAGCACCCCTCTTTATGCCGACTCCGGCAACATTACAAAGTACCCATCTTCCCATTAG  
GCCCCCTTGAAAAGATGGCACCCCTCCTCTCCGCCAGCTTTCTTAAAGAGGATTACGACTGTCTAACTTG  
GCTTGAAAAACAAGCTCCAAAATCTGTTATTTATGTGAGTTTCGGAAGCATCGCAATGGTGGAGCCAAAT  
GAGCTAAGTGAGGTGGCGTGGGGCCTAGCCAACAGCGGCCAACCGTTCTTATGGGTGGTTCGACCCGGTT  
TGGTTGAAGGGTCAGAAAGGATCGAGCACTTACCGGAGGGTTTTAAAGAGACTGTTGGAGAGAGGGGGTG  
TATTGTGAAGTGGGCCCCGAGAAGGAGGTGTTGGCACACGAGGCGGTGGGAGGATTTTGAGCCATTGC  
GGGTGGAATTCGAGTTTGAGAGCATTCTGAAGGGGTGCCGATGATTTGTAGGCCGTGTTTTGGCGATC  
AGAGAGTGAATGCTAGGTATTTGACTCATGTTTGGAGGGTAGGATTGGAATTGGAATAAATTTGAGAG  
AGGGGCCATTGAAAGTGCTGTGAGAAGGCTTATGATAGGTAAAGAAGGGAAAGAAATAAGGCGGAAAGTG

TTGGATATGAAGCAAAACATTGAAGAAATAGTGCAGAAAGGCGGCTCTTCTTACAATACCCTGATTGAGT  
TGGCAGATTTTCATTTCTGATTTTCACAAAACAGGGCAATATTAA

>GWHPAAL026244

ATGGAAAACCAGAAGGAAACAAGATATCCAAAAGAGGTGGTGTAGTTCCCTTTCCAGTACAAGGCCACA  
CAAGCCCCATGCTCCAACTCGGCACCCCTCCTCCACTCCCTTGGCTTCTCGATCACCGTCGCACACGCCCG  
TATCAATTACCTCACCCGTCGACCCACCCGGAGTTCGATTTCCAACCCATATCGGAGGACCTAGCGGAT  
CGCGACACCTCATTCAACGGCCTATTCTCTGTTCATCATGACTCTCAACACCGACTGCGGAGAGCCGCTCC  
GGGAGTGTTTGGTTTCGGTTAACGGAAGATCGGGGGCCGGTCGCATGCGTGGTGTACGACTCGCTCATGTA  
TTTTGCCGATGAGGTTGCGAATCAGATGAAGATTCCGAGCATGGTGCTTCAGACTTGTAATGCTGCTTAT  
ATTTTGCCATGCCAGCTTCTTCCCCAGCTGAAGGCAGAAGGCTATCTTCCCTCCGAATCTGAAGATCCTT  
CATGGGAGGACCTCGTGCCGAAGCTTCACCCCTCAGATTCAAGGATTTACCCTTTCTAAATTTGACAC  
ACCCACTCTACAAGTACTCATGACTCTATGCGATGTAAGAACGTCCTCCGCCATAATTTGGAACACCACC  
GACCACCTTGAGCACCCCTTCTTATGCCGACTCCGGCAGCATTATAAAGTACCCATCTTCCCATTAGGCC  
CCTTGCAAAAAATGGCTCCCTCATCTTCCACCAGTTTTCTTAAAGAGGAATATGACTGTCTAACTTGGCT  
CGAAAAACAGGCTCCAAAATCTGTTATTTATGTGAGTTTCGGAAGCATCGCGACGGTGGAGCCAAATGAG  
CTAAGCGAGGTGGCGTGGGGCTGGTCAACAGTGGCCTGCCGTTTTTATTGGTTGTTTCGACCCGTTTGG  
TAAATGGGTCAGAATGGATCGAGCACTTGCCGGAGAGTTTTAAAGAGTTTGTGGAGAGAGGGGGTGTAT  
TGTGAAGTGGGCCCCACAAAAGGAGGTATTGGCACACGAGGCGGTGGGAGGATTTTGGAGCCATTGCGGG  
TGGAATTCGAGTTTGGAGAGCATTTCTGAAGGGGTGCCGATGATTTGCAGACCGTGTTTGGCGATCAGA  
GAGTGAATGCTAGGTATTTGACTCATGTTTGGAGGGTAGGATTGGAATTGGAAGATAAATTGGAGAGAGG  
AGCCATTGAAAGAGTACTGAGAAGGCTTATGACGGGTAAAGAAGGGGAAGAAATAAGGCGGAGAGCGATG  
GACATGAAGCAAAACATTGAAGAAGTTGTGCAGAAAGGCGGCTCTTCTTATAATTCCCTGATTGAGTTGG  
CAGGTTTCATCTCTGATTTTCACACGACAAAAGCAATGTGTTTAA
